# Supplementary material for: Glypican-1 drives unconventional secretion of fibroblast growth factor 2
Source: eLife. 2022 Mar 29;11:e75545. doi: 10.7554/eLife.75545 (PMC8986318; doi:10.7554/eLife.75545)
Supplement: Figure 1—source data 1. [file elife-75545-fig1-data1.xlsx]

## Sheet: 20210724 plain matrix export Vo
Significant	-Log(P-value)	Difference	Protein IDs	Majority protein IDs	Protein names	Gene names	Sequence coverage R1 Bcyt [%]	Sequence coverage R1 F2cyt [%]	Sequence coverage R2 Bcyt [%]	Sequence coverage R2 F2cyt [%]	Sequence coverage R3 Bcyt [%]	Sequence coverage R3 F2cyt [%]	BiotinylationAtLysine site positions	Oxidation (M) site positions	Symbol color	Symbol type	Symbol size	Show label	Only identified by site	Reverse	Potential contaminant	Fraction 1	Fraction 2	Peptides	Razor + unique peptides	Unique peptides	Sequence coverage [%]	Unique + razor sequence coverage [%]	Unique sequence coverage [%]	Mol. weight [kDa]	Q-value	Score	Intensity	MS/MS Count	Mean	Mean f2_1	Intensity R1 Bcyt	Intensity R1 F2cyt	Intensity R2 Bcyt	Intensity R2 F2cyt	Intensity R3 Bcyt	Intensity R3 F2cyt	Mean f2	Mean b
+	3,53969985841507	5,35607846577962	A0A024R1S8;Q14847;Q14847-2;C9J9W2;A8K1D2;Q14847-3;B4DIC4;B4DJI4;F6S2S5;Q9NPR7;K7ESD6;J3KSN1;B7ZB56;O76041-2;Q59FZ8	A0A024R1S8;Q14847;Q14847-2;C9J9W2;A8K1D2;Q14847-3;B4DIC4;B4DJI4	LIM and SH3 domain protein 1	LASP1	24.1	4.6	37.5	10	34.9	10	96	64;131;139;252	Color [Red]	9	4					16	32	13	13	13	414	414	414	29717	0	1679	38995000	51	6499106,66666667	0,0244385823607445	23,16368	17,55652	24,14243	18,67993	23,27498	18,2764	18,24228	23,59698
+	2,68466440983169	-4,80173492431641	A0A024R1U0;P46060;B4DY16;B4E0U0;Q9BSK3;Q8WUS7;H0Y4Q3;B0QYT5;B0QYT4	A0A024R1U0;P46060;B4DY16;B4E0U0;Q9BSK3	Ran GTPase-activating protein 1	RANGAP1	0	15.7	0	19.9	0	3.9			Color [Red]	9	4					17	1	10	10	10	237	237	237	63541	0	19304	7806300	20	1301030	∞	16,1853	21,18192	16,01924	22,10063	16,49949	19,82668	21,31122	14,6716
+	1,88120781448955	8,25189781188965	B2RA03;A0A024RAY2;P05783;F8VZY9;I6L965;CON__H-INV:HIT000015463	B2RA03;A0A024RAY2;P05783;F8VZY9;I6L965	Keratin, type I cytoskeletal 18	KRT18	82.8	24.7	74.2	17.2	80	1.6	407;426	58;74;84;174;213;313;335;402	Color [Red]	9	4					96	107	44	43	32	856	84	70	48029	0	32331	922190000	256	153698164	0,00737241143360734	27,28268	21,84084	28,85082	21,51307	27,99787	16,02177	21,10128	28,18493
+	2,83948656755861	-4,34095891316732	A0A0S2Z4G7;A0A0S2Z491;P06748-2;P06748;A4ZU86;P06748-3;Q9BTI9;Q9NX34;A0A024R3V9;E5RI98;E5RGW4	A0A0S2Z4G7;A0A0S2Z491;P06748-2;P06748;A4ZU86;P06748-3	Nucleophosmin	NPM1	30.6	41.5	12.8	39.6	7.9	38.9	141	1;5;7;9;65;81;249	Color [Red]	9	4					26	45	12	12	12	506	506	506	29464	0	81651	137970000	95	22995883,3333333	19,4005889892578	21,70033	24,93481	21,0747	25,9382	20,12956	25,05445	25,38236	21,10433
+	2,2132572969645	-10,9200960795085	D9ZGF5;P09038-2;A0A087WUF6;P09038-3;P09038-1;P09038	D9ZGF5;P09038-2;A0A087WUF6;P09038-3;P09038-1;P09038	Fibroblast growth factor;Fibroblast growth factor 2	FGF2	9	92.3	15.5	97.4	0	76.1	35;75;86;95;144	85;151	Color [Red]	9	4					163	59	30	30	30	981	981	981	17254	0	32331	9043700000	416	1507288966,66667	796,943664550781	22,65711	30,5	22,17026	32,16354	16,408	31,33213	31,4875	21,84916
+	3,45810538288959	-8,57518482208252	P35052;H7C410;A0A024R4D5;H7C024;Q59GI7;P35052-2;C9J4Y6;H7BZE9;Q53EX3;H7BZL4	P35052;H7C410;A0A024R4D5;H7C024;Q59GI7;P35052-2	Glypican-1;Secreted glypican-1	GPC1	0	31	0	25.6	0	32.4		99;405	Color [Red]	9	4					40		17	17	17	407	407	407	6168	0	13154	64836000	48	10806050	∞	15,62607	22,77581	14,95193	24,11386	15,82148	25,23535	24,36534	17,55843
+	2,89076172281778	-5,59293874104818	Q6IBA2;Q59G24;P53999;B7Z1Z0;Q6E433	Q6IBA2;Q59G24;P53999;B7Z1Z0	Activated RNA polymerase II transcriptional coactivator p15	PC4;SUB1	0	26	18.9	26.8	0	26		63	Color [Red]	9	4					4	13	5	5	5	268	268	268	14395	0	27446	24780000	18	4129970	104,213233947754	16,8285	21,67866	17,84549	23,74253	16,73839	22,77002	22,96392	16,26053
+	2,09053463187711	-6,02908198038737	Q9BZZ5-2;G3V1C3;Q9BZZ5-3;Q9BZZ5;Q9BZZ5-5;Q9BZZ5-6;Q9BZZ5-1;B4DDR3;H0YER7;E9PQK6	Q9BZZ5-2;G3V1C3;Q9BZZ5-3;Q9BZZ5;Q9BZZ5-5;Q9BZZ5-6;Q9BZZ5-1;B4DDR3;H0YER7	Apoptosis inhibitor 5	API5	0	25.6	0	31.2	2.6	17.7		127;293;300	Color [Red]	9	4					32	1	19	19	19	472	472	472	56769	0	30934	28651000	38	4775225	78,9758529663086	16,04179	21,18186	15,5782	24,1321	18,45061	22,84387	23,16898	16,86564
+	3,04651770994234	3,74879773457845	Q9UKY7;Q9UKY7-2;D3DND1;D6R9V8;H0Y8K3;D6RFH2;D6RDN0;Q9UKY7-3;D6R973;D6RAV0	Q9UKY7;Q9UKY7-2;D3DND1	Protein CDV3 homolog	CDV3	42.2	27.9	41.5	27.9	42.2	27.9		134	Color [Red]	9	4					10	20	8	8	8	527	527	527	27335	0	6399	44891000	43	7481798,33333333	0,0749478563666344	23,6058	19,31935	24,19175	20,06999	23,22919	20,391	19,99272	23,73069
	1,29782931754313	1,49336687723795	A0A024QZ77;Q96C19;H0Y4Y4;Q53SA2;Q7Z2R5;B4DEE0;A0A087X1Z2;A0A024R493;Q59EU6;Q9BUP0-2;Q9BUP0;C9JTV4;Q8WYH2	A0A024QZ77;Q96C19;H0Y4Y4	EF-hand domain-containing protein D2	EFHD2	53.8	53.3	46.7	42.9	46.7	40		115;136	Color [Gray]	9	4					26	99	22	22	22	538	538	538	26697	0	32331	203900000	144	33982833,3333333	0,392976939678192	25,64039	24,27711	25,72902	24,76744	25,19667	23,04143	24,19265	25,54013
	1,84936890122266	3,43474197387695	A0A024QZE9;Q9NWS0;M0QYA2;M0R3A4;M0QYF4;M0QXD5;M0R2P8;M0R028;M0QZM3;M0R3A8;M0QZ61;M0QZZ1;M0R0J2;Q9NWS0-3;M0R1R3	A0A024QZE9;Q9NWS0;M0QYA2;M0R3A4;M0QYF4;M0QXD5;M0R2P8	PIH1 domain-containing protein 1	FLJ20643;PIH1D1	43.4	9.7	57.9	30	35.5	8.3	5	101;132;171	Color [Gray]	9	4					9	40	12	12	12	607	607	607	32431	0	12215	39913000	55	6652093,33333333	0,105800993740559	22,91947	19,14525	24,28221	21,29519	22,88737	19,34438	20,27971	23,52028
	0,812188179616164	-1,49533843994141	A0A024QZN2;Q8WXX5	A0A024QZN2;Q8WXX5	DnaJ homolog subfamily C member 9	hCG_2024613;DNAJC9	0	6.5	0	10.8	0	0			Color [Gray]	9	4						4	2	2	2	108	108	108	29909	0	7644	1252800	4	208793,333333333	∞	17,31682	18,66227	16,03256	19,67642	18,04875	17,54546	18,67172	14,45851
	1,63698948659915	-2,16639296213786	E5RIU6;A0A087WZZ9;I6L9I5;A0A024QZP7;Q5H9N4;P06493;K7ELV5;A0A024QZJ8;P06493-2;B7Z3D6;F8VXD2;B3KX76;F8VYH9;F8VZZ0;F8VTV8;F8VWX7;F8VZ51;Q6LC83;Q8IWB3;A0A0S2Z355;Q9BWF9;Q6IAW3;A0A090N7W4;A0A024RBB6;Q9BVE2;E7EUK8;B4DK59;B5BU53;B2R9L6;A0A024R880;B4DHU6;B4DER5;A0A087X209;Q59G02;F5H6Z0;B4DGP5;A0A024R996;B4DK03;A0A024R980;A0A024RBH0;J3QSD7;A0A024RA66;A0A024RA85;P11802-2;Q00535-2;Q00535;P11802;Q00534;Q96Q4…	E5RIU6;A0A087WZZ9;I6L9I5;A0A024QZP7;Q5H9N4;P06493;K7ELV5;A0A024QZJ8;P06493-2	Cyclin-dependent kinase 1	CDK1;CDC2;DKFZp686L20222;CDK3	15.3	23.8	4.2	5.3	0	0			Color [Gray]	9	4						4	4	2	2	238	138	138	21738	0	34176	708380	5	118063,333333333	4,73633480072021	16,91403	18,42415	14,93994	17,8309	15,7604	17,85851	17,57284	15,32907
	0,491161970942441	-2,91488393147786	B2R4S9;A8K9J7;A0A024RCL8;A0A024RCJ9;A0A024RCJ2;A0A024QZZ7;I6L9F7;U3KQK0;B4DR52;Q99880;Q99879;Q99877;Q93079;Q8N257;Q5QNW6;Q16778;P62807;P58876;P57053;P33778;P23527;P06899;O60814;Q5QNW6-2;Q0D2M2;Q96A08;L0R4T3	B2R4S9;A8K9J7;A0A024RCL8;A0A024RCJ9;A0A024RCJ2;A0A024QZZ7;I6L9F7;U3KQK0;B4DR52;Q99880;Q99879;Q99877;Q93079;Q8N257;Q5QNW6;Q16778;P62807;P58876;P57053;P33778;P23527;P06899;O60814;Q5QNW6-2;Q0D2M2;Q96A08	Histone H2B;Histone H2B type 1-L;Histone H2B type 1-M;Histone H2B type 1-N;Histone H2B type 1-H;Histone H2B type 3-B;Histone H2B type 2-F;Histone H2B type 2-E;Histone H2B type 1-C/E/F/G/I;Histone H2B type 1-D;Histone H2B type F-S;Histone H2B type 1-B;Histone H2B type 1-O;Histone H2B type 1-J;Histone H2B type 1-K;Histone H2B type 1-A	HIST1H2BI;HIST1H2BK;HIST1H2BN;HIST1H2BJ;HIST1H2BD;HIST1H2BM;HIST1H2BL;HIST1H2BH;HIST3H2BB;HIST2H2BF;HIST2H2BE;HIST1H2BC;H2BFS;HIST1H2BB;HIST1H2BO;HIST1H2BA	0	0	0	20.6	0	30.2		60;63	Color [Gray]	9	4					4	3	3	3	3	302	302	302	13906	0	92179	19635000	6	3272481,66666667	∞	16,09674	15,32625	16,57793	19,14542	17,23601	24,18367	22,64195	14,81649
	0,40412277282052	1,76039250691732	Q9GZV0;A0A024R0K2;A0A024R0E2;O75534-2;O75534;O75534-3;O75534-4;E9PLT0;Q96L66;E9PKN4;E9PLD4;Q8WU01;Q9UG93	Q9GZV0;A0A024R0K2;A0A024R0E2;O75534-2;O75534;O75534-3;O75534-4;E9PLT0;Q96L66	Cold shock domain-containing protein E1	CSDE1;UNR	0	1.7	2.3	0	7	2.3			Color [Gray]	9	4					8		4	4	4	7	7	7	85729	0	7116	3394200	9	565708,333333333	0,223377987742424	16,45243	18,12151	18,63817	14,51025	21,17432	18,35199	17,65639	19,81883
	0,369406315638424	-1,13757006327311	M0R3F1;A8K3W4;A0A024R0J9;A0A0A0MRA5;B7Z4B8;A8K6U7;A8K5K0;Q9BUJ2-4;Q9BUJ2-2;Q9BUJ2;Q9BUJ2-3;M0QYM5;M0QYI8;B3KM60;M0QYZ0	M0R3F1;A8K3W4;A0A024R0J9;A0A0A0MRA5;B7Z4B8;A8K6U7;A8K5K0;Q9BUJ2-4;Q9BUJ2-2;Q9BUJ2;Q9BUJ2-3	Heterogeneous nuclear ribonucleoprotein U-like protein 1	HNRNPUL1;HNRPUL1	0	4.7	0	6.7	0	0			Color [Gray]	9	4					5		3	3	3	67	67	67	71611	0	22804	1408400	7	234740	∞	17,0815	18,73876	16,96958	19,8891	16,75431	15,59025	18,8407	16,55411
	0,378822381386679	1,24570147196452	F2Z2F1;B0QYF8;B2RA67;A0A024R1G3;P02144;B0QYF7;Q8WVH6;B4DUI1;U6FM64;U6FIV2;U6FIU7;F2Z337	F2Z2F1;B0QYF8;B2RA67;A0A024R1G3;P02144;B0QYF7;Q8WVH6;B4DUI1	Myoglobin	MB	28.3	14.2	0	27.4	0	0			Color [Gray]	9	4					2	5	3	3	3	283	283	283	11897	0	49925	1962500	8	327085	0,306336939334869	20,51874	16,86762	18,65748	18,37785	16,21499	16,40865	17,22697	18,93378
	1,84768951003106	-3,94792715708414	A0A024R1K8;Q15459;B4E091;Q15459-2;H7C1L2	A0A024R1K8;Q15459;B4E091;Q15459-2	Splicing factor 3A subunit 1	SF3A1	0	11.7	1	10.8	0	1.9			Color [Gray]	9	4					15		10	10	10	182	182	182	88885	0	18358	6938000	18	1156325	19,6277866363525	15,80054	21,21703	18,35956	21,64773	16,60541	19,74454	21,06942	16,7746
	0,66881796413107	-1,59560775756836	B2RDN9;A0A024R1N4;P12956;B4DE32;B1AHC9;P12956-2;Q6IC76;B4E356	B2RDN9;A0A024R1N4;P12956;B4DE32;B1AHC9;P12956-2	X-ray repair cross-complementing protein 6	XRCC6	0	2.3	0	0	0	4.1			Color [Gray]	9	4					3		3	3	3	64	64	64	69784	0	64993	1241500	3	206921,666666667	∞	15,96046	17,40732	16,31401	16,55281	16,92491	20,02608	18,65873	16,76083
	0,17407822052341	-0,54659875233968	E4W6B6;B2R4D8;A0A024R1V4;P61353;K7ERY7;K7EQQ9;K7ELC7	E4W6B6;B2R4D8;A0A024R1V4;P61353;K7ERY7;K7EQQ9;K7ELC7	60S ribosomal protein L27	RPL27	0	13.5	0	6.3	0	6.3			Color [Gray]	9	4					1	3	2	2	2	135	135	135	14257	11148	2139	793750	4	132291,666666667	∞	17,32606	18,74511	15,70517	15,98922	18,4982	18,4349	18,01336	14,71965
	0,312627074141635	-2,50697771708171	A0A0S2Z487;A0A024R1X8;P14923;A0A0S2Z495;Q7KZ86	A0A0S2Z487;A0A024R1X8;P14923	Junction plakoglobin	JUP	2.4	7	25.5	2.4	0	42.1		164;180;193;471;631	Color [Gray]	9	4					45	1	26	26	15	485	485	332	81744	0	18918	107260000	50	17876655	18,2393455505371	18,47409	19,13796	22,3131	18,23257	15,64932	26,58692	25,01457	20,82559
	0,551166823902194	-1,94095293680827	B4DUQ1;A0A024R228;Q6IBN1;Q5EC54;P61978-3;P61978;P61978-2;B4DFF1;Q5T6W2;S4R359;S4R457	B4DUQ1;A0A024R228;Q6IBN1;Q5EC54;P61978-3;P61978;P61978-2;B4DFF1;Q5T6W2	Heterogeneous nuclear ribonucleoprotein K	HNRPK;HNRNPK	11.8	31.4	32.6	33	39	33.5		27;42	Color [Gray]	9	4					67	18	18	18	10	431	431	246	4851	0	13922	108780000	97	18130440	2,20713567733765	19,77046	23,09502	22,69192	25,3221	24,64576	24,51388	24,5728	23,43063
	0,605378507781288	-0,980739593505859	A0A024R2T2;Q96AT1	A0A024R2T2;Q96AT1	Uncharacterized protein KIAA1143	KIAA1143	19.5	10.4	34.4	23.4	17.5	23.4			Color [Gray]	9	4					2	16	5	5	5	344	344	344	17465	0	12314	17286000	18	2881033,33333333	2,3414261341095	20,54482	20,39352	21,15066	22,73929	20,32729	21,83217	21,94508	20,71769
	1,35562163012068	-2,77555815378825	A0A024R2Z6;Q9BVP2-2;Q9BVP2	A0A024R2Z6;Q9BVP2-2;Q9BVP2	Guanine nucleotide-binding protein-like 3	GNL3	0	2	0	2	0	0			Color [Gray]	9	4					2		1	1	1	2	2	2	60572	90543	15336	1119900	2	186645	∞	16,80619	17,58358	15,04525	19,81668	14,88108	17,65893	18,50994	15,29575
	0,413639143311176	-1,17142740885416	A0A024R326;Q6IPI1;P47914	A0A024R326;Q6IPI1;P47914	60S ribosomal protein L29	RPL29	9.6	9.6	9.6	5.1	0	9.6			Color [Gray]	9	4					2	4	2	2	2	146	146	146	17553	0	26227	4313500	6	718911,666666667	2,39892196655273	19,39324	18,82233	19,14694	18,67783	16,4893	21,0436	19,95276	18,69038
	0,656476046553908	-1,50763193766276	A0A024R395;P49959;Q05D78;F8W7U8;P49959-2;P49959-3;Q9BS79;F5GXT0;F5H742;A0A0S2Z438;F5H256	A0A024R395;P49959;Q05D78;F8W7U8;P49959-2;P49959-3;Q9BS79;F5GXT0	Double-strand break repair protein MRE11A	MRE11A	0	6.4	0	3.2	0	0		157	Color [Gray]	9	4					5		5	5	5	96	96	96	80592	0	78379	1123800	5	187300	∞	16,04972	19,76215	16,31083	17,83984	17,03555	16,317	18,51499	15,10133
	0,550705897230646	-1,09421602884928	Q86T74;A0A024R3E4;P46937-5;P46937-3;P46937-6;P46937-7;P46937-2;P46937-8;P46937;P46937-9;H0YCI3;P46937-4;B4E2Y3	Q86T74;A0A024R3E4;P46937-5;P46937-3;P46937-6;P46937-7;P46937-2;P46937-8;P46937;P46937-9;H0YCI3;P46937-4;B4E2Y3	Transcriptional coactivator YAP1	DKFZp451O0517;YAP1	0	15.9	9.1	9.3	4.8	9.3		263;270;297	Color [Gray]	9	4					7		4	4	4	249	249	249	43281	0	98334	2605800	9	434303,333333333	1,67477571964264	16,39188	19,06954	19,42302	18,90979	18,04948	19,16769	19,05289	18,30893
	0,0943717613481191	0,0566450754801444	C9K058;A0A024R3V4;H7BZ14;B4DN80;Q9H2H8	C9K058;A0A024R3V4;H7BZ14;B4DN80;Q9H2H8	Peptidyl-prolyl cis-trans isomerase;Peptidyl-prolyl cis-trans isomerase-like 3	PPIL3	17.5	17.5	0	0	0	17.5		50	Color [Gray]	9	4						3	1	1	1	175	175	175	90341	0	53605	479380	4	79895	1,65167605876923	17,46387	16,97365	16,90393	16,94828	17,0983	17,37424	16,60284	15,87891
	0,419555103451437	-0,642255147298176	B4DYU9;A0A024R411;Q13416	B4DYU9;A0A024R411;Q13416	Origin recognition complex subunit 2	ORC2L;ORC2	0	3.5	0	2.3	0	0			Color [Gray]	9	4					2		2	2	2	58	58	58	58667	0	12472	359230	2	59873,3333333333	∞	15,63091	17,54683	16,37472	17,35604	16,73202	15,76153	16,86963	16,24032
	1,09674083845612	-6,2198600769043	B3KM80;B3KTP9;A0A024R4A0;P19338;Q6ZS99;H7BY16;Q9BQ02	B3KM80;B3KTP9;A0A024R4A0;P19338;Q6ZS99;H7BY16;Q9BQ02	Nucleolin	NCL	0	47	37.7	50.2	16.4	46.6		456	Color [Gray]	9	4					149	6	44	44	44	554	554	554	58554	0	32331	500630000	195	83438816,6666667	11,458854675293	16,01584	26,80304	25,13497	27,55567	21,67051	27,12218	27,19351	23,67512
	0,418574417843478	1,35881678263346	A0A087WX29;A0A0A0N0L3;A0A024R4E2;Q13148;K7EJM5;A0A0A0N0N3;A0A0A0N0M3;K7EN94;B1AKP7;G3V162;A0A087X260;A0A087WYY0;B4DRW3;A0A087WXQ5;A0A087WV68;Q13148-4;K7EJ99;A0A0A0MSV7;A0A087WW61;A0A087WX67;A0A087WXV3	A0A087WX29;A0A0A0N0L3;A0A024R4E2;Q13148;K7EJM5;A0A0A0N0N3;A0A0A0N0M3;K7EN94;B1AKP7;G3V162;A0A087X260;A0A087WYY0;B4DRW3;A0A087WXQ5;A0A087WV68;Q13148-4	TAR DNA-binding protein 43	TARDBP;TDP43	7.4	0	25.9	7.4	16	12.3			Color [Gray]	9	4					9	4	4	4	4	259	259	259	26743	0	18708	4126300	15	687726,666666667	0,490564674139023	17,86012	16,15593	20,48915	18,08908	20,01373	20,04153	18,78813	19,81562
	0,62968981998399	2,99123636881511	B2R5V9;A0A024R4E5;Q00341;Q00341-2;H0Y394;B4DKR8;Q6ZS03;Q96CF6;H7C0A4;C9JIZ1;C9JZI8;C9J5E5;Q5HYC5;H7BZC3;Q6ZN49;C9JT62;C9JHS7;C9JK79;C9JHZ8;C9JES8;H7C2D1;C9JHS9;C9J739;C9JMQ6;C9JQ82;C9JBS3;C9JEJ8;A0A0U1RVI6;C9JHN6;Q2HJC8	B2R5V9;A0A024R4E5;Q00341;Q00341-2;H0Y394;B4DKR8;Q6ZS03	Vigilin	HDLBP	0	2.4	12.5	1.7	6.8	0			Color [Gray]	9	4					21		13	13	13	147	147	147	14138	0	52851	9987800	23	1664638,33333333	0,084772951900959	16,89007	18,26577	22,60741	18,82799	21,42583	14,85584	17,98913	21,54939
	0,550699710597845	2,43169085184733	A0A024R4F1;P06733;E2DRY6;P06733-2;K7EM90;A4UCS8;A4QMW8;L0R849;Q6FHV6;P13929-3;P09104-2;P13929-2;P13929;P09104;E5RI09;E5RG95;K7EPM1;K7EKN2;E5RGZ4;F5H0C8;D3DTL4;A8K3B0;F5H1C3;Q9NPL4;B4DUJ6	A0A024R4F1;P06733;E2DRY6;P06733-2	Alpha-enolase;Enolase	ENO1	57.1	17.3	71	35.9	57.1	54.6	92;103	94;97;165;169;244;368	Color [Gray]	9	4					83	63	29	29	29	728	728	728	47168	0	32331	300650000	167	50108383,3333333	0,713605105876923	25,4255	20,09146	26,29733	23,06974	25,514	26,78057	25,31471	25,80151
	0,0945300165889744	-0,267301559448242	A0A024R4H5;Q53HN4;O00273-2;O00273;K7ERT1	A0A024R4H5;Q53HN4;O00273-2;O00273;K7ERT1	DNA fragmentation factor subunit alpha	DFFA	5.2	6	0	6	0	0			Color [Gray]	9	4						3	2	2	2	112	112	112	2941	0	43429	569890	4	94981,6666666667	4,10014295578003	16,76979	17,38659	15,61837	18,12969	18,46288	16,13667	17,2205	15,18482
	0,376205535791654	-1,66461277008057	A0A024R4I7;Q8WZA0;Q8WZA0-2;K7ES95	A0A024R4I7;Q8WZA0;Q8WZA0-2	Protein LZIC	LZIC	0	4.2	15.8	32.6	0	15.8	176		Color [Gray]	9	4						11	5	5	5	326	326	326	21494	0	35532	3028300	12	504727,333333333	8,8669490814209	15,46682	15,36612	18,2275	21,13471	16,33614	18,52348	19,79098	16,64254
	0,0087076398914435	0,0167802174886091	A0A024R4T4;P61081;M0QX69;M0QYI6	A0A024R4T4;P61081	NEDD8-conjugating enzyme Ubc12	UBE2M	47.5	47.5	32.8	36.1	35.5	41.5	3	1	Color [Gray]	9	4					2	45	9	9	9	475	475	475	209	0	58688	54998000	51	9166300	0,923921585083008	23,91843	22,60524	22,08994	23,68035	22,97897	22,65141	23,0697	23,18386
	1,20344125917037	-1,69811121622721	A0A0A6YYC7;A0A024R4Z4;A0A024R4Z1;Q96JP5-2;Q96JP5	A0A0A6YYC7;A0A024R4Z4;A0A024R4Z1;Q96JP5-2;Q96JP5	E3 ubiquitin-protein ligase ZFP91	ZFP91-CNTF;hCG_2042749;ZFP91	0	4.7	0	2.3	0	0			Color [Gray]	9	4					2		2	2	2	7	7	7	5957	0	37515	536670	3	89445	∞	16,56693	17,59674	14,98079	18,36858	16,06513	16,74187	17,44871	14,19972
	0,587458277172304	-2,86798095703125	A0A024R588;A0A024R566;B4DJU4;A0A024R5D9;A0A024R572;Q15637-4;Q15637-6;Q15637-3;Q15637-2;Q15637;B4DSE4;Q15637-7;Q15637-5;B4DX42;Q14820;F8WEV5;H7C561;C9J792	A0A024R588;A0A024R566;B4DJU4;A0A024R5D9;A0A024R572;Q15637-4;Q15637-6;Q15637-3;Q15637-2;Q15637;B4DSE4;Q15637-7;Q15637-5;B4DX42	Splicing factor 1	SF1	0	18.4	11.7	22.6	22.8	18.4		116;141;195;212	Color [Gray]	9	4					40		12	12	12	276	276	276	59711	0	10435	46984000	46	7830816,66666667	1,88761126995087	16,31715	22,96008	21,15697	23,35111	23,732	23,49887	23,28742	22,37086
	1,23117707973002	-3,36752955118815	A0A024R5C5;P11498;P11498-2;E9PRE7;E9PS68	A0A024R5C5;P11498	Pyruvate carboxylase;Pyruvate carboxylase, mitochondrial	PC	21.1	66.6	36.8	69	56.5	56.4		75;204;403;508;566;604;616;641;724;743;754;828;854;881;900;921;1012;1095;1098;1116;1166	Color [Gray]	9	4					475	73	86	86	86	733	733	733	12963	0	32331	2932500000	712	488761169,333333	5,53996706008911	24,56139	28,94693	25,301	30,33202	28,51017	29,1962	29,62515	27,15527
	0,274244271081673	-0,131160100301109	A0A024R5G4;Q59HB8;A0A024R5M9;Q4LE64;Q14980-4;Q14980-3;Q14980-2;Q14980;Q3SYK8;F5H6Y5;F5H4J1;A8K394;Q96HN5;H0YFY6;Q7Z757;A0A087WY61	A0A024R5G4;Q59HB8;A0A024R5M9;Q4LE64;Q14980-4;Q14980-3;Q14980-2;Q14980;Q3SYK8;F5H6Y5;F5H4J1;A8K394;Q96HN5;H0YFY6;Q7Z757;A0A087WY61	Nuclear mitotic apparatus protein 1	NUMA1;NUMA1 variant protein	0	0.8	0	0.8	0	0			Color [Gray]	9	4					2		2	2	2	16	16	16	17451	0	24216	155530	2	25920,8333333333	∞	15,70991	16,22835	16,08411	16,26499	16,29724	15,99139	15,66182	15,82781
	1,08764032260744	-2,99103673299154	A0A024R5M8;Q15054;Q05BV7;B7ZAQ5;B4DYZ7;Q15054-2;Q569I8;Q15054-3;E9PM91;E9PNC0;E9PRK3;B4DMA6;Q8WUF6	A0A024R5M8;Q15054;Q05BV7;B7ZAQ5;B4DYZ7;Q15054-2;Q569I8;Q15054-3;E9PM91;E9PNC0;E9PRK3	DNA polymerase delta subunit 3	POLD3	0	13.1	9.4	25.3	2.8	5.6		107	Color [Gray]	9	4					22	1	10	10	10	253	253	253	514	0	90199	12766000	25	2127743,33333333	7,70563125610352	16,35517	20,4716	19,71389	22,92136	19,21017	20,85939	21,84486	18,89894
	0,425680629444552	1,22616831461589	V9HW65;A0A024R5Z7;P07355;P07355-2;H0YN42;H0YMD0;H0YMU9;A6NMY6;H0YKS4;B4DNH8;H0YM50;H0YMM1;B3KRQ1;H0YKZ7;H0YLV6;H0YMT9;H0YKX9;H0YNP5;H0YKL9;H0YN28;H0YL33;H0YKV8;H0YMW4;H0YMD9;H0YNA0;H0YNB8;H0YN52;H0YKN4;H0YLE2	V9HW65;A0A024R5Z7;P07355;P07355-2;H0YN42;H0YMD0;H0YMU9;A6NMY6;H0YKS4;B4DNH8;H0YM50;H0YMM1	Annexin;Annexin A2;Putative annexin A2-like protein	HEL-S-270;ANXA2;ANXA2P2	71.1	50.1	55.5	29.2	53.4	57.8	10;49	118;240	Color [Gray]	9	4					55	101	27	27	27	714	714	714	38576	0	32331	243020000	171	40502650	0,841238796710968	25,6462	23,14995	25,58569	22,69848	24,79521	26,50016	25,14142	25,39084
	0,57943808139971	3,00669097900391	B2RCI6;A0A024R6C4;A0A024R6F4;P49757-3;P49757;A0A024R684;A0A024R681;P49757-4;P49757-2;P49757-8;P49757-7;P49757-6;P49757-5;Q86SW5;G3V3R1;G3V3Z8;G3V3M5;Q86SW6;P49757-9;G3V4S6;G3V433;Q5D0E5;B4DUD7	B2RCI6;A0A024R6C4;A0A024R6F4;P49757-3;P49757;A0A024R684;A0A024R681;P49757-4;P49757-2;P49757-8;P49757-7;P49757-6;P49757-5;Q86SW5;G3V3R1;G3V3Z8;G3V3M5;Q86SW6	Protein numb homolog	NUMB	0	1.7	22.8	4.1	7.7	0		199;202;378	Color [Gray]	9	4					21		12	12	9	255	255	208	69358	0	29397	20711000	22	3451871,66666667	0,048563688993454	16,75119	17,41518	23,89763	19,58132	21,97561	16,60785	18,28655	22,65053
	0,152082715243429	-0,454196294148762	G3V5E1;A0A024R6K1;O75909-1;O75909;O75909-4;G3V2Q3;O75909-2;G3V235	G3V5E1;A0A024R6K1;O75909-1;O75909;O75909-4;G3V2Q3;O75909-2;G3V235	Cyclin-K	CCNK	0	11.4	6.3	8.5	0	0		141	Color [Gray]	9	4					6		5	5	5	212	212	212	43404	0	86123	1779000	8	296493,333333333	2,05358910560608	17,03577	19,12475	19,1521	19,2529	17,32777	16,50059	18,60528	17,56713
	0,607395674160773	-3,83659076690674	G3XAH6;A0A024R6M3;P51003;B4DHB8;B4DYF4;A0A024R6J7;P51003-2;G3V2A0;A0A0C4DGK1;G3V3I9;H0YJ00;A4D1Z6;A0ZTA0;Q9NRJ5;G3V457;B4DZL2;B7ZA53;H7C3W0;H0YJL4;F8WAT4;Q53T17;Q05DB9;Q2TAI9;Q9BWT3-2;Q9BWT3	G3XAH6;A0A024R6M3;P51003;B4DHB8;B4DYF4;A0A024R6J7;P51003-2	Poly(A) polymerase alpha	PAPOLA	0	45.2	36.7	43.2	22.9	34.1		251;313;335;337;436	Color [Gray]	9	4					111		33	33	33	552	552	552	80625	0	13707	157310000	139	26219000	3,21335411071777	15,71488	24,5715	24,52564	25,92023	23,65239	24,91095	25,25322	23,56914
	0,581224710449981	1,69941075642904	A0A024R6Q1;P55010;Q6IBU0;H0YLZ1;Q32Q19;Q05DF3;H0YN40;H0YMJ8;H0YM54;B4DEN3;H0YK11;H0YK29	A0A024R6Q1;P55010;Q6IBU0	Eukaryotic translation initiation factor 5	EIF5	28.5	26.7	49.4	35.5	35	11.4	413	39;88;216;275;324;340	Color [Gray]	9	4					76	19	22	22	22	529	529	529	49222	0	27944	198340000	102	33057116,6666667	0,221729785203934	22,70868	22,64724	26,64691	24,40009	25,58723	22,79727	23,51641	25,68953
	0,656683252450485	-1,16025161743164	H3BTI2;H3BTP8;H3BSY6;H3BP64;H3BUL4;H3BMX9;A0A024R6T8;Q9GZU8;H3BQQ6;Q6P4H7;H3BSF0;H3BN22;H3BPH9;H3BPF9;H3BU93	H3BTI2;H3BTP8;H3BSY6;H3BP64;H3BUL4;H3BMX9;A0A024R6T8;Q9GZU8;H3BQQ6;Q6P4H7;H3BSF0;H3BN22	Protein FAM192A	FAM192A;NIP30	52.8	53.8	9.4	23.6	23.6	23.6		1	Color [Gray]	9	4					5	16	6	6	3	708	708	387	13124	0	11478	14500000	24	2416606,66666667	1,72465634346008	21,67379	21,47135	18,95288	21,7961	20,48611	21,32608	21,54479	20,75848
	0,151015938070429	0,844869295756023	H3BNC0;A0A024R6Z2;A0A024R726;Q9NVM4-4;Q9NVM4-3;Q9NVM4;H3BPZ8;Q9NVM4-2;H3BSS9	H3BNC0;A0A024R6Z2;A0A024R726;Q9NVM4-4;Q9NVM4-3;Q9NVM4;H3BPZ8	Protein arginine N-methyltransferase 7	PRMT7	0	4.4	12.5	9.3	19.4	0		134;286;509;511	Color [Gray]	9	4					14		7	7	7	222	222	222	63775	0	42562	6691800	14	1115283,33333333	0,399673700332642	15,97362	18,17524	20,21098	20,62292	21,76636	16,61819	19,28078	20,60389
	0,634436865429318	-0,802800178527832	A0A024R784;O15164-2;O15164;Q6ZSA6;B4DYZ9;A0A087X1V3	A0A024R784;O15164-2;O15164;Q6ZSA6;B4DYZ9;A0A087X1V3	Transcription intermediary factor 1-alpha	TRIM24	0	2.9	0	0.9	0	0			Color [Gray]	9	4					2		2	2	2	37	37	37	11302	11299	22023	203960	2	33993,8333333333	∞	15,82145	16,57242	16,83913	16,70063	16,30285	18,09878	16,05299	15,76064
	0,656121377861948	-1,76794115702311	K7ELW9;A0A024R7G4;Q9NVP2;K7EIL9;K7ES22;B4DXU6;K7EM93	K7ELW9;A0A024R7G4;Q9NVP2;K7EIL9;K7ES22;B4DXU6	Histone chaperone ASF1B	ASF1B	9.1	38.2	0	17	0	9.1			Color [Gray]	9	4						6	3	3	3	382	382	382	18285	0	86218	3446000	8	574335	2,65411162376404	19,84698	20,32235	17,40844	18,68003	16,00112	19,55798	19,67024	18,26201
	0,263781159209267	1,8426628112793	A0A024R7G6;Q9UBC2-3;Q9UBC2;Q9UBC2-2;M0R165;A8K5P4;B4DME4;A5PKY0;B4DQX5;Q9UBC2-4;M0R2S2;M0R3I1;Q69YZ4;M0R1V5;K7EJR2;M0R330;M0QX30	A0A024R7G6;Q9UBC2-3;Q9UBC2;Q9UBC2-2;M0R165;A8K5P4;B4DME4;A5PKY0;B4DQX5;Q9UBC2-4;M0R2S2	Epidermal growth factor receptor substrate 15-like 1	EPS15L1	0	12.5	54.5	16	48.5	4.2		98;111;337;476;597	Color [Gray]	9	4					74	2	38	38	38	662	662	662	83247	0	29626	70237000	82	11706345	0,0735334008932114	16,80087	20,32421	25,50918	21,4977	24,07488	19,03502	20,61296	24,37842
	0,748631691548307	-0,925496737162273	B4E0Q6;B4DKZ7;A0A024R7K7;A0A024R7M6;Q86YP4-2;Q86YP4;Q86YP4-3;A0A0U1RR30;A0A0U1RRM1;B3KSZ4;Q8WXI9	B4E0Q6;B4DKZ7;A0A024R7K7;A0A024R7M6;Q86YP4-2;Q86YP4;Q86YP4-3;A0A0U1RR30;A0A0U1RRM1;B3KSZ4;Q8WXI9	Transcriptional repressor p66-alpha;Transcriptional repressor p66-beta	GATAD2A;GATAD2B	0	8.8	0	4.2	0	0			Color [Gray]	9	4					3		2	2	2	88	88	88	28651	0	32648	427250	5	71208,3333333333	∞	15,58193	17,59849	16,61534	17,80367	17,16889	16,7405	17,11976	15,70536
	0,350773091124019	0,705804824829102	A0A024R7Z5;O00560-3;O00560;B4DQ93;B4DHN5;E9PBU7	A0A024R7Z5;O00560-3;O00560;B4DQ93	Syntenin-1	SDCBP	35.2	24.8	44.3	24.2	6	13.8		57;92	Color [Gray]	9	4					2	39	10	10	1	487	487	6	32444	0	52102	24591000	51	4098500	0,58518660068512	22,81267	21,28675	22,6082	22,26679	20,74082	20,49072	21,52898	22,30201
	0,631305978365085	-2,13028144836426	A8MUD9;A0A024R814;P18124;O95036;C9JZ88;C9JIJ5	A8MUD9;A0A024R814;P18124;O95036	60S ribosomal protein L7	RPL7;WUGSC:H_RG054D04.1	5.3	5.3	0	0	0	26.4			Color [Gray]	9	4					4	2	4	4	4	264	264	264	24433	0	43351	6123400	6	1020566,66666667	40,7922477722168	17,16074	17,95436	16,94944	17,98021	17,88186	22,44831	20,926	15,57578
	1,76053015665177	-3,22778638203939	A0A024R895;Q01105-2;A0A0C4DFV9;B2RCX0;Q5VXV3;Q01105-3;Q01105-4;Q01105;A0A087X027;P0DME0	A0A024R895;Q01105-2;A0A0C4DFV9;B2RCX0;Q5VXV3;Q01105-3;Q01105-4;Q01105	Protein SET	SET	3.6	17.7	8.7	25.6	8.7	20.2	7		Color [Gray]	9	4					5	15	7	7	7	307	307	307	32103	0	10985	31783000	25	5297173,33333333	8,30269813537598	18,83904	22,24569	21,09526	23,87951	19,43196	22,92443	23,17272	20,11914
	0,363233658146995	-1,36835034688314	A0A024R8R0;J3QQJ0;Q9UHR5-2;Q9UHR5;Q659G6;F5H478;B7Z4X9;J3KRU5;X6R3T8;J3QLH3;J3QLM2;J3KS14;J3KRR6	A0A024R8R0;J3QQJ0;Q9UHR5-2;Q9UHR5;Q659G6;F5H478;B7Z4X9;J3KRU5;X6R3T8;J3QLH3	SAP30-binding protein	SAP30BP;DKFZp586L2022	8.8	13.3	0	9.1	0	0		147;149	Color [Gray]	9	4					4	5	4	4	4	136	136	136	3387	0	16234	2604800	9	434130	2,45814681053162	19,52273	19,66804	15,54082	19,95802	17,09194	16,63448	19,23534	17,93777
	0,435139055352592	-1,83567714691162	A0A024R8S3;A8MUA9;A8MU27;P61956-2;Q6EEV6;P61956;P55854;P55854-2	A0A024R8S3;A8MUA9;A8MU27;P61956-2;Q6EEV6;P61956;P55854;P55854-2	Small ubiquitin-related modifier;Small ubiquitin-related modifier 2;Small ubiquitin-related modifier 4;Small ubiquitin-related modifier 3	SUMO2;SUMO3;SUMO4	0	0	0	12.6	12.6	12.6			Color [Gray]	9	4					3		1	1	1	126	126	126	10871	0	70372	3279300	3	546548,333333333	10,0098705291748	15,46976	15,62443	17,17081	19,67545	18,18423	21,03194	19,92262	16,59926
	0,281371572979635	2,18694241841634	A0A0S2Z5A5;A0A024R8V0;Q9UHD8-7;Q9UHD8-2;Q9UHD8-5;Q9UHD8;A0A024R8Q0;Q9UHD8-3;A0A0S2Z5W9;Q9UHD8-4;Q9UHD8-9;Q9UHD8-8;K7EL40;K7EK18;Q1WWK5;K7ER52;K7EIE4;K7EQD7;K7ELJ9;K7EJZ2;K7ER14;K7EIR4;K7EKN4;K7EN52;K7ENQ5;K7EJ51;K7ENL0;K7EJL9;B4DTL7;K7EJV0;K7EQ08;K7ERG1;A2VCQ5;K7ER34	A0A0S2Z5A5;A0A024R8V0;Q9UHD8-7;Q9UHD8-2;Q9UHD8-5;Q9UHD8;A0A024R8Q0;Q9UHD8-3;A0A0S2Z5W9;Q9UHD8-4;Q9UHD8-9;Q9UHD8-8;K7EL40	Septin-9	SEPT9	0	11.6	39.4	8.6	32.7	0		174;234;270;362	Color [Gray]	9	4					39		20	20	17	486	486	417	63665	0	71773	35004000	46	5834150	0,0970915481448174	15,74133	20,25014	23,95331	20,81972	23,90095	15,9649	19,9779	23,34241
	0,186323386099936	-0,959268569946289	A0A024R9Y7;Q9UNF1;Q5H909;Q9UNF1-2;B4DX55;Q5H907;B4DWM5;B4DNG7;A0A024R254;Q9Y5V3;Q9Y5V3-2	A0A024R9Y7;Q9UNF1;Q5H909;Q9UNF1-2;B4DX55;Q5H907;B4DWM5	Melanoma-associated antigen D2	MAGED2	0	12.7	29.5	13.5	6.1	4		118;373;381	Color [Gray]	9	4					28		14	14	14	332	332	332	64953	0	43722	13055000	31	2175911,66666667	0,638870239257813	16,13716	19,92901	22,74146	21,43858	19,86339	20,25223	20,69408	21,34049
	0,298115742803487	-1,5618527730306	A0A024RA28;P22626-2;P22626;I6L957;A0A087WUI2	A0A024RA28;P22626-2;P22626;I6L957;A0A087WUI2	Heterogeneous nuclear ribonucleoproteins A2/B1	HNRPA2B1;HNRNPA2B1	0	0	0	3.3	0	14.6			Color [Gray]	9	4					4	1	4	4	4	179	179	179	31162	0	84341	5005400	5	834233,333333333	∞	16,2143	14,97115	16,78558	18,3705	17,81012	22,15391	20,67009	17,15634
	0,806135418214528	-1,74845759073893	A5PLK7;A0A024RAC5;Q9P258	A5PLK7;A0A024RAC5;Q9P258	Protein RCC2	RCC2	0	0	0	3.9	0	1.8			Color [Gray]	9	4					3		2	2	2	39	39	39	49678	0	26853	795280	3	132548,333333333	∞	16,87551	16,02808	15,99591	18,7751	15,08963	18,40325	18,01616	16,3704
	1,7991319872295	-3,30694961547852	A0A024RAC6;Q14241	A0A024RAC6;Q14241	Transcription elongation factor B polypeptide 3	TCEB3	0	8.7	0	3.5	0	0			Color [Gray]	9	4					6	1	4	4	4	87	87	87	87229	0	14174	1575900	7	262651,666666667	∞	15,20609	20,02093	15,01096	18,96581	16,75891	17,91007	19,00279	15,78344
	1,15374187268796	-2,32951450347901	B4DMD3;B4DY34;A0A024RAW9;Q9Y2W2;F5H5G4	B4DMD3;B4DY34;A0A024RAW9;Q9Y2W2	WW domain-binding protein 11	WBP11	0	7.6	0	4.2	0	0		214	Color [Gray]	9	4					5		4	4	4	95	95	95	64907	0	28642	1107000	7	184505	∞	16,56971	19,2547	15,54514	18,87721	15,47204	16,44353	18,4933	14,2241
	0,973601568503519	-2,63252385457357	F8W6I7;Q6IPF2;A0A024RB53;A0A024RAZ7;P09651-3;P09651-2;P09651;A0A024RC46;F8VZ49;Q9BSM5;Q0VAC0;F8VTQ5;A0A024QZ98;Q32P51;H0YH80;F8W646;B4DP35;F8VYN5;B4E0B5;Q3MI39	F8W6I7;Q6IPF2;A0A024RB53;A0A024RAZ7;P09651-3;P09651-2;P09651;A0A024RC46;F8VZ49;Q9BSM5;Q0VAC0;F8VTQ5;A0A024QZ98;Q32P51;H0YH80	Heterogeneous nuclear ribonucleoprotein A1;Heterogeneous nuclear ribonucleoprotein A1, N-terminally processed;Heterogeneous nuclear ribonucleoprotein A1-like 2	HNRNPA1;HNRPA1;hCG_2020860;RP11-78J21.1;HNRNPA1L2	17.6	31.3	14	33.6	0	21.8		72;137	Color [Gray]	9	4					5	25	11	11	11	41	41	41	33155	0	89741	16401000	36	2733500	3,8832848072052	20,94528	21,95401	20,35326	21,82478	16,9107	22,32803	22,05174	20,09447
	0,733834212878468	-1,97599220275879	Q75MH1;A0A024RB14;P62854;Q76N57;Q5JNZ5	Q75MH1;A0A024RB14;P62854;Q76N57;Q5JNZ5	40S ribosomal protein S26;Putative 40S ribosomal protein S26-like 1	RPS26;RPS26P11	7.8	20.9	7.8	0	0	13			Color [Gray]	9	4					1	4	2	2	2	209	209	209	12985	0	85254	3003300	5	500551,666666667	8,90015125274658	17,17329	19,38901	17,24711	16,74971	16,73154	20,9412	19,77954	16,62571
	0,125164304140196	-0,502737045288086	F8W1N5;F8VZJ2;F8VNW4;B4DDI8;F8W0W4;H0YHX9;A0A024RB41;Q13765;E9PAV3-2;E9PAV3	F8W1N5;F8VZJ2;F8VNW4;B4DDI8;F8W0W4;H0YHX9;A0A024RB41;Q13765;E9PAV3-2;E9PAV3	Nascent polypeptide-associated complex subunit alpha;Nascent polypeptide-associated complex subunit alpha, muscle-specific form	NACA;hCG_2016482	19.7	19.7	19.7	0	0	40.8			Color [Gray]	9	4					2	3	2	2	2	408	408	408	7813	0	27211	3389600	5	564926,666666667	4,12095499038696	18,46547	18,01814	18,19431	16,33512	17,41678	21,23152	19,79427	17,75129
	1,47980812653898	2,75073719024658	Q53FU3;A0A024RB72;F8VVA7;P61923;F8VXB1;F8W156;F8VYZ4;P61923-5;P61923-4;F8VUC5;F8W651;F8VXR1;P61923-3;F8VYK5;F8VYE0;P61923-2	Q53FU3;A0A024RB72;F8VVA7;P61923;F8VXB1;F8W156;F8VYZ4;P61923-5;P61923-4;F8VUC5;F8W651;F8VXR1;P61923-3	Coatomer subunit zeta-1	COPZ1	26.6	13.6	9	9	5.6	0		1	Color [Gray]	9	4						9	4	4	4	356	356	356	20267	0	25739	3292000	10	548670	0,0964044034481049	21,01195	17,02702	18,9583	17,25035	18,53035	15,97102	16,55804	19,9328
	0,00220422334426099	0,0122419993082694	A0A024RB77;G3V5T9;P24941;E7ESI2;B4DDL9;A0A024RB10;P24941-2;A0A024R8R3;Q00526;G3V317;K7EJ83	A0A024RB77;G3V5T9;P24941;E7ESI2;B4DDL9;A0A024RB10;P24941-2	Cyclin-dependent kinase 2	CDK2	23.2	36.6	11.1	12.4	0	0		91;233	Color [Gray]	9	4						19	8	8	6	366	366	302	33929	0	33923	6502000	19	1083650	1,58083593845367	20,31263	21,37873	20,2149	20,26029	17,42759	16,27937	20,34032	19,67963
	0,93288626767563	2,36404736836751	F8VY35;F5H4R6;H0YIV4;A0A024RBB7;P55209-2;P55209;F8W118;F8VV59;A0A024RBE6;F8W0J6;B7Z2V4;H0YH88;H0YHC3;F8W020;F8VUX1;F8W543;B7Z9C2;F8VXI6;P55209-3;F8VRJ2;B7Z5H0;F8VVB5;B7Z4K9	F8VY35;F5H4R6;H0YIV4;A0A024RBB7;P55209-2;P55209;F8W118;F8VV59;A0A024RBE6;F8W0J6;B7Z2V4;H0YH88;H0YHC3;F8W020;F8VUX1;F8W543;B7Z9C2;F8VXI6;P55209-3;F8VRJ2;B7Z5H0	Nucleosome assembly protein 1-like 1	NAP1L1	10.6	10.6	44.7	19.3	26.5	0		42;43;184;210	Color [Gray]	9	4					17	5	9	9	8	564	564	527	3102	0	26782	15166000	24	2527633,33333333	0,263321876525879	20,65779	19,18302	22,45746	21,29103	22,13041	17,67947	20,00703	21,93213
	0,262815226333536	-0,707750638326008	A0A024RBE7;P42167;A0A024RBH7;G5E972;P42167-2;Q59G12;P42167-3;H0YJH7;Q9P1N8	A0A024RBE7;P42167;A0A024RBH7;G5E972;P42167-2;Q59G12;P42167-3	Lamina-associated polypeptide 2, isoforms beta/gamma;Thymopoietin;Thymopentin	TMPO	11.9	14.3	0	18.3	9	12.1			Color [Gray]	9	4					2	1	9	2	2	289	48	48	5067	0	28432	689170	3	114861,666666667	∞	16,71141	17,33752	15,65077	18,99797	17,86075	16,01069	17,80954	13,38987
	0,381995159273986	-1,46025244394938	B4DRX3;Q8TBK5;Q8N5Z7;B2R4K7;A0A024RBK3;Q9HBB3;Q02878;F8VR69;F8VZ45;U3KQR5	B4DRX3;Q8TBK5;Q8N5Z7;B2R4K7;A0A024RBK3;Q9HBB3;Q02878;F8VR69;F8VZ45;U3KQR5	60S ribosomal protein L6	RPL6	0	6.6	0	6.6	0	10.6			Color [Gray]	9	4					3	3	2	2	2	106	106	106	26073	0	13263	2978000	6	496343,333333333	∞	17,36964	17,05558	15,601	17,51067	18,55519	21,34033	19,92098	14,5166
	0,0936924226326032	0,559290568033855	B7Z2S5;A0A087WSW9;A0A024RBK9;A0A087WSY9;Q16881-4;Q16881-3;Q16881;E9PIR7;B2R5P6;F8W809;E9PNQ6;Q6ZR44;Q16881-5;Q16881-2;Q16881-6;E2QRB9;Q16881-7;E9PKD3;E9PQI3;E9PLT3;E9PKI4;A0A0B4J225;E9PIZ5;E9PRI8	B7Z2S5;A0A087WSW9;A0A024RBK9;A0A087WSY9;Q16881-4;Q16881-3;Q16881;E9PIR7;B2R5P6;F8W809;E9PNQ6;Q6ZR44;Q16881-5;Q16881-2;Q16881-6;E2QRB9;Q16881-7	Thioredoxin reductase 1, cytoplasmic	TXNRD1	0	2.7	37.3	13.5	5.9	9		89;338	Color [Gray]	9	4					24		15	15	15	437	437	437	60021	0	53021	13797000	28	2299435	0,345288872718811	16,50775	17,89066	22,83921	21,03181	21,39184	20,13846	20,17081	21,70493
	0,419421710265875	-1,46269353230794	F8VU65;B4E3D5;Q53HW2;A8K4Z4;A0A024RBS2;Q8NHW5;P05388;F8VPE8;G3V210;F8VW21;Q6NSF2;F8VWS0;Q53HK9;P05388-2;F8VQY6;F8VRK7;F8VS58;F8VZS0	F8VU65;B4E3D5;Q53HW2;A8K4Z4;A0A024RBS2;Q8NHW5;P05388;F8VPE8;G3V210;F8VW21;Q6NSF2;F8VWS0;Q53HK9;P05388-2;F8VQY6;F8VRK7	60S acidic ribosomal protein P0-like;60S acidic ribosomal protein P0	RPLP0;RPLP0P6	0	10.1	8.9	0	0	14.2			Color [Gray]	9	4					3	3	4	4	4	231	231	231	27187	0	66698	4443300	7	740548,333333333	17,5029144287109	17,30586	18,76814	17,87352	16,76875	17,81046	21,84103	20,41808	16,28855
	0,436820664891384	-1,6423495610555	H0Y2X5;B4DYU3;B2R5T2;A0A024RC95;P47895;Q7Z3A2;H0YLT1;H0YNQ3;B4E0M6;H0YMG7;B4DH89;O94788-4;O94788-3;O94788	H0Y2X5;B4DYU3;B2R5T2;A0A024RC95;P47895;Q7Z3A2	Aldehyde dehydrogenase family 1 member A3	ALDH1A3;DKFZp686G1675	0	0	0	3.7	0	6.4	16		Color [Gray]	9	4					2	1	3	3	3	101	101	101	44256	0	36905	1647600	2	274610	∞	15,19181	15,32683	16,01434	17,75799	17,39517	20,44354	19,06702	15,25111
	0,916216846979383	-3,76690610249837	B4DMA2;A0A024RD80;P08238;B4DGL0;Q9H6X9;A8K3W9;Q6PK50;Q58FF7;Q58FF8;F8W026;O14942;B4DQX3;G3V2J8;B4DTA5;Q86SX1;Q96GW1;Q14568	B4DMA2;A0A024RD80;P08238;B4DGL0;Q9H6X9;A8K3W9	Heat shock protein HSP 90-beta	HSP90AB1	0	2	0	3.6	0	17.2		428;579;582;583	Color [Gray]	9	4					13		11	11	6	208	208	118	79194	0	56921	15764000	13	2627468,33333333	∞	16,57743	17,52221	16,00507	18,97301	16,45642	23,84441	22,32524	14,23246
	0,754553875716527	-1,43339093526205	D6RF44;H0YA96;D6RAF8;H0Y8G5;Q12771;B4DTC3;A0A024RDF4;A0A024RDB4;A0A024RDF3;Q14103-4;Q14103-3;Q14103-2;Q14103;D6RBQ9;B4E0W4;B4DTA2;A0A087WUK2;A0A024RDF6;O14979-3;O14979-2;O14979	D6RF44;H0YA96;D6RAF8;H0Y8G5;Q12771;B4DTC3;A0A024RDF4;A0A024RDB4;A0A024RDF3;Q14103-4;Q14103-3;Q14103-2;Q14103;D6RBQ9;B4E0W4;B4DTA2;A0A087WUK2;A0A024RDF6;O14979-3;O14979-2;O14979	Heterogeneous nuclear ribonucleoprotein D0;Heterogeneous nuclear ribonucleoprotein D-like	HNRNPD;HNRPD;HNRNPDL;HNRPDL	19.6	19.6	12.5	19.6	12.5	19.6			Color [Gray]	9	4					5	6	2	2	2	196	196	196	1264	0	91831	4214000	12	702331,666666667	2,62082624435425	19,32939	18,60628	17,12586	20,00881	18,46579	20,60612	19,9555	18,56547
	0,585124378639103	2,87394332885742	A0A024RDE8;Q96HC4;B7Z8X5;Q96HC4-7;Q96HC4-4;Q96HC4-6;Q59FC9;H0Y8Y3;B7Z481;A0A0A0MSP3;Q4W5K9;Q96HC4-3;Q96HC4-2;H0YBI4;A0A0D9SFR4;H0Y929;D6RAA1;A0A0D9SFW3;D6RGG6;Q96HC4-5	A0A024RDE8;Q96HC4;B7Z8X5;Q96HC4-7;Q96HC4-4;Q96HC4-6;Q59FC9;H0Y8Y3;B7Z481	PDZ and LIM domain protein 5	PDLIM5	4.9	3.4	30.5	5.9	29.7	1.5		26;79;419;453	Color [Gray]	9	4					37	4	18	18	18	386	386	386	63974	0	63146	37620000	43	6269955	0,0622628293931484	17,84665	18,17816	24,16415	20,50891	23,96543	18,66733	19,4874	23,49288
	1,35203985117906	-3,28106053670248	Q5T7C4;B7Z965;Q59GW1;A0A024RDR0;P09429;Q9NYD7;B3KQ05;Q75MM1;B2RPK0;D6R9A6;Q5U071;P26583	Q5T7C4;B7Z965;Q59GW1;A0A024RDR0;P09429;Q9NYD7;B3KQ05;Q75MM1;B2RPK0	High mobility group protein B1;Putative high mobility group protein B1-like 1	HMGB1;HMG1;WUGSC:H_NH0244E06.1;HMGB1P1	0	28.5	0	17.7	0	7.6		13	Color [Gray]	9	4						6	4	4	4	361	361	361	18311	0	52458	3066300	4	511060	∞	15,96564	20,29165	15,28471	20,59332	17,40727	17,61583	19,96313	14,88256
	1,52839397546507	-3,4474131266276	A0A024RDU9;P13984	A0A024RDU9;P13984	General transcription factor IIF subunit 2	GTF2F2	37.8	70.7	13.3	67.9	9.2	34.9	137	125;186	Color [Gray]	9	4					8	50	17	17	17	723	723	723	2838	0	90991	66401000	70	11066923,3333333	10,9214105606079	21,83144	24,52349	19,90382	24,90072	19,70926	22,36255	24,27336	20,82427
	1,09968521213604	-3,53680324554443	A8K670;A0A075B6F9;Q9Y314;M0R3B2;M0R1T7;M0QX85;B4DUN3;M0R1K2;A0A075B797	A8K670;A0A075B6F9;Q9Y314;M0R3B2	Nitric oxide synthase-interacting protein	NOSIP	17.3	19.6	0	28.2	8.6	24.6		194	Color [Gray]	9	4					8	16	6	6	6	282	282	282	33184	0	50959	18583000	26	3097211,66666667	5,31639289855957	21,17767	22,20015	15,99556	22,56347	19,12078	22,1408	22,31388	19,90344
	0,76409415609417	-4,37276713053385	Q8WYD2;A0A087WV90;E9PDN5;A0A087WTU7;A0A075B6G3;P11532-3;P11532-2;P11532-4;P11532	Q8WYD2;A0A087WV90;E9PDN5;A0A087WTU7;A0A075B6G3;P11532-3;P11532-2;P11532-4;P11532	Dystrophin	DMD	0	21.1	21.1	21.1	0	21.1			Color [Gray]	9	4					2	2	1	1	1	211	211	211	65204	0	34996	111110000	4	18517591,6666667	20,9407081604004	17,23301	19,78445	22,27182	23,021	16,70824	26,52592	25,07509	20,68686
	2,79614194864348	-3,20386219024658	A0A087WT30;Q8N5I9;J3KN91	A0A087WT30;Q8N5I9	Uncharacterized protein C12orf45	C12orf45	0	15	0	6.4	0	4.3		79	Color [Gray]	9	4						5	3	3	3	193	193	193	20336	0	51075	1563200	6	260540	∞	15,47457	19,51832	15,90778	18,14011	15,66213	18,99764	18,99115	13,22719
	0,169333788721534	-0,804083506266274	A0A096LNJ4;A0A087WX43;D6RE84;A0A087WTT9;Q9NP73-2;Q9NP73;A0A096LP10;A0A096LNL2	A0A096LNJ4;A0A087WX43;D6RE84;A0A087WTT9;Q9NP73-2;Q9NP73;A0A096LP10;A0A096LNL2	Putative bifunctional UDP-N-acetylglucosamine transferase and deubiquitinase ALG13	ALG13	14.4	20.5	14.4	43.2	0	0			Color [Gray]	9	4						8	4	4	4	432	432	432	14767	0	65273	3988300	8	664726,666666667	3,04281663894653	19,5193	19,78777	17,84285	20,99969	16,72545	15,7124	19,93245	18,32704
	0,940886892643142	-4,12454922993978	A0A087WV66;P46013;P46013-2;Q70L73;Q70L72	A0A087WV66;P46013;P46013-2	Antigen KI-67	MKI67	0	10.7	0	2.2	0	0		1004;1190;1370;1554	Color [Gray]	9	4					32	3	25	25	25	11	11	11	35862	0	53991	9711200	37	1618533,33333333	∞	14,85728	23,03587	14,9595	20,08395	17,56838	16,639	21,62626	13,60866
	0,397413830754988	-0,805688222249351	Q7Z3K9;A0A087WZZ5;Q13435;E9PPJ0;E9PJT3;H0YEX5;E9PJ04;H0YCG1;E9PIL8	Q7Z3K9;A0A087WZZ5;Q13435;E9PPJ0;E9PJT3;H0YEX5;E9PJ04;H0YCG1	Splicing factor 3B subunit 2	DKFZp781L0540;SF3B2	0	6.5	2.6	1.1	0	0		703;704;712;716	Color [Gray]	9	4					6		4	4	4	76	76	76	90022	0	52569	1392900	7	232148,333333333	1,35221898555756	16,44264	18,78274	19,17563	18,41592	17,11161	17,94828	18,02599	17,59067
	0,780120340884686	-2,18006197611491	A0A087X0M4;Q9BWU0;A0A087WWF4;B4DV74;H7C256	A0A087X0M4;Q9BWU0	Kanadaptin	SLC4A1AP	0	6.3	13.9	9.2	1.2	8.4			Color [Gray]	9	4					18		9	9	9	205	205	205	8289	0	18379	8726500	20	1454423,33333333	2,77618622779846	17,03013	20,1121	20,96726	21,81488	17,99281	20,6034	21,02819	19,55509
	0,794820300595154	1,59319814046224	E9KL42;B4DV16;A1L172;A0A087X0W7;Q86TX2;G3V4F2;B7ZMC1;A0A087WT95;P49753;B3KSA0;P49753-2	E9KL42;B4DV16;A1L172;A0A087X0W7;Q86TX2;G3V4F2;B7ZMC1;A0A087WT95;P49753;B3KSA0;P49753-2	Acyl-coenzyme A thioesterase 1;Acyl-coenzyme A thioesterase 2, mitochondrial	ACOT1;ACOT2	12.1	6.9	5.2	5.2	9.5	0			Color [Gray]	9	4					4	9	4	4	4	121	121	121	46277	0	7019	5769400	13	961560	0,391699522733688	20,80262	19,13824	19,71104	19,99755	20,47586	17,07413	19,04599	20,39817
	0,311399478109382	1,35288588205973	F6S8N6;A0A0A0MRJ6;H7BY58;P22061;P22061-2;F8WDT3;F8WAV5;F8WAX2;B7Z972;H7C4X2	F6S8N6;A0A0A0MRJ6;H7BY58;P22061;P22061-2;F8WDT3;F8WAV5;F8WAX2;B7Z972	Protein-L-isoaspartate O-methyltransferase;Protein-L-isoaspartate(D-aspartate) O-methyltransferase	PCMT1	29.6	17.6	5.2	5.2	4	0		90;168;214	Color [Gray]	9	4						9	5	5	5	348	348	348	26626	0	90604	3925600	10	654266,666666667	0,402035057544708	21,24348	19,64285	18,27517	18,22807	17,47409	15,06316	18,51739	19,832
	0,634502225379544	-1,00573317209879	B2RAU8;A0A0A0MRM9;Q14978;Q14978-3;Q14978-2;S4R402;S4R341;S4R349;Q96J17	B2RAU8;A0A0A0MRM9;Q14978;Q14978-3;Q14978-2;S4R402;S4R341;S4R349;Q96J17	Nucleolar and coiled-body phosphoprotein 1	NOLC1	0	1.6	0	3.7	0	0			Color [Gray]	9	4					2	2	2	2	2	37	37	37	73603	0	30361	733940	4	122323,333333333	∞	15,94508	18,92706	17,71752	17,84537	17,69812	17,60549	17,90034	15,04091
	0,0124725847927262	-0,0646088918050118	A0A0A0MRT2;Q9BTA9-5;Q9BTA9-2;Q9BTA9;Q9NZE0;C9JVK6;C9JD58;J3QTA0;B4DMH1;Q9BTA9-3	A0A0A0MRT2;Q9BTA9-5;Q9BTA9-2;Q9BTA9	WW domain-containing adapter protein with coiled-coil	WAC	0	5.1	6.1	6.9	5.1	0			Color [Gray]	9	4					6		3	3	3	111	111	111	53878	0	84406	4051000	10	675173,333333333	1,215256690979	16,41685	19,40466	19,61791	20,5435	19,96593	16,24636	19,49869	19,21742
	0,266019746258708	-0,385607401529946	Q53GS8;B3KM78;A0A0C4DFX9;Q9H3P2;B3KSP0;B3KTK5;H0Y3X6;Q9H3P2-7;F8W954;F8WF98;H7C2M8;C9JHL4	Q53GS8;B3KM78;A0A0C4DFX9;Q9H3P2;B3KSP0;B3KTK5;H0Y3X6;Q9H3P2-7	Negative elongation factor A	NELFA;WHSC2	0	4	4.9	7.6	0	0			Color [Gray]	9	4					4		3	3	3	116	116	116	57348	0	42914	452560	5	75426,3333333333	5,64666318893433	16,85404	17,31787	16,05511	17,75427	17,82875	16,82258	16,96755	14,47015
	1,06446321201683	-3,09653027852376	A8K6X3;A0A0C4DG89;Q7L014;D3DQA6;H0Y9U3;D6RJA6	A8K6X3;A0A0C4DG89;Q7L014;D3DQA6	Probable ATP-dependent RNA helicase DDX46	DDX46	0	8	0	5	0	0		430;506;509	Color [Gray]	9	4					11	3	8	8	8	9	9	9	11747	0	18178	3178600	14	529783,333333333	∞	15,96439	20,37857	15,40754	20,79193	17,4319	16,92292	20,01504	15,85156
	0,554212360642927	2,91691398620605	A0A0C4DGB5;D6RGF7;D6RBR1;E7EN75	A0A0C4DGB5		CAST	0	2.9	40.3	3.8	18.3	3.3		152;332;458;501	Color [Gray]	9	4					47		25	25	1	45	45	11	80998	0	12619	58044000	53	9674005	0,0458308421075344	18,20914	17,46483	25,57129	19,27032	22,42813	20,72267	19,69349	24,14103
	1,12366004544909	-2,35582542419434	A0A0C4DGV5;O95218-2;O95218	A0A0C4DGV5;O95218-2;O95218	Zinc finger Ran-binding domain-containing protein 2	ZRANB2	0	2.7	0	6.2	0	5.9			Color [Gray]	9	4					4	1	3	3	3	89	89	89	38223	0	48186	1932300	5	322055	∞	15,82142	17,01029	16,95505	19,73833	16,72482	19,82015	19,29695	16,19807
	1,58590715721298	-3,36235618591309	Q96CA8;Q6P5Y5;Q4VBY6;A4VCI5;Q5QPR4;J3QR29;B4E3D9;A0A0D9SEI3;Q5QPR3;B7ZVY7;A0A0D9SER5;A0A0D9SEN2;J3QR44;Q9UQ88-5;Q9UQ88-10;P21127-12;P21127-4;P21127-5;P21127-10;P21127-6;P21127-9;Q9UQ88-4;P21127-8;Q9UQ88-3;Q9UQ88-2;P21127-3;P21127-2;Q9UQ88;P21127;Q9UQ88-9;B4E0M9;B4E0N4;Q9UQ88-8;Q13882	Q96CA8;Q6P5Y5;Q4VBY6;A4VCI5;Q5QPR4;J3QR29;B4E3D9;A0A0D9SEI3;Q5QPR3;B7ZVY7;A0A0D9SER5;A0A0D9SEN2;J3QR44;Q9UQ88-5;Q9UQ88-10;P21127-12;P21127-4;P21127-5;P21127-10;P21127-6;P21127-9;Q9UQ88-4;P21127-8;Q9UQ88-3;Q9UQ88-2;P21127-3;P21127-2;Q9UQ88;P21127;Q9UQ88-9	Cyclin-dependent kinase 11A;Cyclin-dependent kinase 11B	CDC2L2;CDC2L1;CDK11A;CDK11B	0	9.3	1.9	18.1	0	1.9		212;369	Color [Gray]	9	4					15		10	10	10	205	205	205	52406	0	34394	5582300	15	930370	24,6689205169678	16,3898	20,03228	17,73046	21,86476	16,54256	18,85285	20,77012	16,14549
	0,236778675005647	-1,37154324849447	Q5S4N1;A0A0D9SFB3;A0A0D9SG12;B5BTY4;Q59GX6;A0A0D9SF53;O00571-2;O00571;A0A087WVZ1;A0A0J9YVQ7;B4E132;A0A024R9A4;O15523-2;O15523;B4DLU5	Q5S4N1;A0A0D9SFB3;A0A0D9SG12;B5BTY4;Q59GX6;A0A0D9SF53;O00571-2;O00571;A0A087WVZ1;A0A0J9YVQ7;B4E132;A0A024R9A4;O15523-2;O15523	ATP-dependent RNA helicase DDX3X;ATP-dependent RNA helicase DDX3Y	DDX3X;DDX3Y	0	0	2.8	6.6	9.7	9.7			Color [Gray]	9	4					9		3	3	3	97	97	97	40187	0	11711	5231400	10	871896,666666667	1,98472094535828	15,26709	15,92668	16,61281	19,28717	20,65622	21,4369	20,14514	19,1562
	0,457497370015048	-2,96488475799561	A8K5I0;A0A0G2JIW1;P0DMV9;P0DMV8;B4DNT8;Q59EJ3;B4DWK5;B4DI39;P0DMV8-2;B4DFN9;B4E1S9;B4DVU9;B4E388;V9GZ37;B3KTT5;B4DNX1;B4E1T6;Q9UQC1;B4DNV4	A8K5I0;A0A0G2JIW1;P0DMV9;P0DMV8;B4DNT8;Q59EJ3;B4DWK5;B4DI39;P0DMV8-2;B4DFN9;B4E1S9;B4DVU9;B4E388;V9GZ37;B3KTT5;B4DNX1	Heat shock 70 kDa protein 1B;Heat shock 70 kDa protein 1A	HEL-S-103;HSPA1B;HSPA1A	0	8.7	13.1	18.9	10.3	36.7		87;122;518;549	Color [Gray]	9	4					45		18	18	9	381	381	22	70051	0	97198	85572000	49	14262110	8,03704261779785	15,63356	19,9305	22,41062	22,89713	21,89275	26,00395	24,5965	21,58983
	3,03467579587257	-2,32177003224691	N0E466;N0E4C7;Q5SRQ3;Q5SRQ6;N0E472;A0A0G2JM12;P67870	N0E466;N0E4C7;Q5SRQ3;Q5SRQ6;N0E472;A0A0G2JM12;P67870	Casein kinase II subunit beta	CSNK2B;CSNK2B-LY6G5B-1181;CSNK2B-LY6G5B--991	0	8.8	0	8.8	0	0			Color [Gray]	9	4						2	1	1	1	88	88	88	14568	0	23042	538120	2	89685	∞	15,59974	18,18044	16,07735	17,87891	15,24786	17,8309	17,45258	15,01497
	0,973350904807465	-1,83909479777018	A0A0S2Z3F9;P50613;D6R9G1;D6RAD4;D6REC6;D6RFL0;D6RGG9;D6RI01;D6R9Z2;D6RF14;D6RIG9;A0A0D9SFW9	A0A0S2Z3F9;P50613;D6R9G1;D6RAD4;D6REC6	Cyclin-dependent kinase 7	CDK7	2.6	9.8	0	7.2	0	2.6			Color [Gray]	9	4						7	4	4	4	145	145	145	39038	0	60426	2323600	7	387276,666666667	9,82736110687256	17,71136	19,59931	16,7056	20,12376	17,18306	17,39423	19,4232	16,12639
	0,614786676399241	-3,30548477172852	A0A0S2Z3K9;P46108-2	A0A0S2Z3K9;P46108-2	Adapter molecule crk	CRK	86.8	76.5	41.2	53.4	46.1	52	105	181	Color [Gray]	9	4						7	15	1	1	951	74	74	22905	0	22731	14900000	7	2483350	1,65551590919495	22,41983	21,39242	14,37125	22,30416	17,36177	20,37273	21,56215	20,83486
	0,255415296905314	-0,806489308675133	L7RT18;A0A0S2Z3Q4;P46108;I3L297	L7RT18;A0A0S2Z3Q4;P46108	Adapter molecule crk	CRK	67.1	53	27.6	37.8	34.9	33.9	105	181	Color [Gray]	9	4					10	62	19	19	5	73	73	141	3383	0	19469	135000000	110	22499716,6666667	1,07711100578308	25,43129	24,79694	21,3213	24,69227	24,02977	23,71261	24,47599	24,36883
	0,319143015686213	-2,08326212565104	A0A0S2Z4Z9;Q15233;A8K525;Q15233-2;C9JYS8;C9IZL7;H7C367;A0A0S2Z4E7;C9J4X2;C9JJ13	A0A0S2Z4Z9;Q15233;A8K525;Q15233-2;C9JYS8;C9IZL7;H7C367	Non-POU domain-containing octamer-binding protein	NONO	0	15.1	33.3	39.7	13.2	13.8	5	1;90;132;269;277;298;300;310;312;326;384;387;389;393;441	Color [Gray]	9	4					51	3	18	18	17	437	437	42	54231	0	89943	59013000	66	9835600	1,04224753379822	15,95116	21,91656	24,65245	24,42752	21,26808	21,7774	23,25912	23,19942
	0,666024615148292	-1,61979643503825	A0A0S2Z5A4;A0A0S2Z5B9;D3DVA4;A8K1I7;Q7Z7F0-4;Q7Z7F0-3;Q7Z7F0-2;Q7Z7F0	A0A0S2Z5A4;A0A0S2Z5B9;D3DVA4;A8K1I7;Q7Z7F0-4;Q7Z7F0-3;Q7Z7F0-2;Q7Z7F0	UPF0469 protein KIAA0907	KIAA0907	0	0	0	9.8	0	7.5			Color [Gray]	9	4					2		2	2	2	172	172	172	1781	0	70599	578280	2	96380	∞	15,60385	16,19523	14,45234	17,69758	17,45757	18,48034	17,55645	13,73186
	1,55186935637572	-3,39139366149902	Q68D27;F5GYT8;E9PHF7;A0A0S2Z693;Q96RQ3;B4DH16;E9PG35;G5E9X5;B4DHW5;B7ZAW3	Q68D27;F5GYT8;E9PHF7;A0A0S2Z693;Q96RQ3;B4DH16;E9PG35;G5E9X5;B4DHW5	Methylcrotonoyl-CoA carboxylase subunit alpha, mitochondrial	DKFZp686B20267;MCCC1	0	17.7	0	15.3	4.2	4.2		199;246;503	Color [Gray]	9	4					13		8	8	8	219	219	219	63966	0	38196	6052400	15	1008735	18,1078453063965	16,20191	20,97141	16,86657	21,59814	18,27299	18,94609	20,86657	16,68802
	0,261285849025654	1,42412980397542	A0A0U1RQF0;P49327;Q6PJJ3	A0A0U1RQF0;P49327	Fatty acid synthase;[Acyl-carrier-protein] S-acetyltransferase;[Acyl-carrier-protein] S-malonyltransferase;3-oxoacyl-[acyl-carrier-protein] synthase;3-oxoacyl-[acyl-carrier-protein] reductase;3-hydroxyacyl-[acyl-carrier-protein] dehydratase;Enoyl-[acyl-carrier-protein] reductase;Oleoyl-[acyl-carrier-protein] hydrolase	FASN	0	0	3.8	0.5	3.1	2.6			Color [Gray]	9	4					14	1	10	10	10	64	64	64	2732	0	24156	5285900	15	880995,333333333	0,973983287811279	16,84197	15,53287	19,49837	16,14673	20,88554	21,2739	19,72963	19,76767
	0,569172269751058	-2,20052782694498	A6NLN1;A0A0U1RRM4;P26599;P26599-2;P26599-3;K7EK45;A0A0D9SF20;A0A087WU68;K7EKJ7;Q59H49	A6NLN1;A0A0U1RRM4;P26599;P26599-2;P26599-3;K7EK45	Polypyrimidine tract-binding protein 1	PTBP1	0	0	4.4	7.8	0	8.2			Color [Gray]	9	4					5		3	3	3	116	116	116	5651	0	80149	3836000	6	639330	15,7196092605591	15,25756	16,22346	17,8077	18,87222	17,00506	21,57621	20,19723	16,22273
	0,670774855690209	2,44167772928874	A1L3A7;Q7Z417;Q7Z417-2	A1L3A7;Q7Z417	Nuclear fragile X mental retardation-interacting protein 2	NUFIP2	6.5	10.4	20.3	6.3	30.1	0		245;403;532;690	Color [Gray]	9	4					33	4	17	17	17	348	348	348	7612	0	1775	24037000	38	4006248,33333333	0,159243881702423	19,63004	20,62417	22,60921	20,685	23,68923	17,29427	20,06995	22,72064
	0,129911915877648	-0,436389923095703	A2BEK1;O60927;Q5SRK2	A2BEK1;O60927	Protein phosphatase 1 regulatory subunit 11	PPP1R11	53.2	32.5	19.8	31.7	19.8	19.8		53;124	Color [Gray]	9	4					3	9	4	4	4	54	54	54	13952	0	13026	9936700	20	1656121,66666667	1,00131916999817	21,82815	21,29524	19,83187	20,80806	18,23519	19,10108	20,66033	20,65843
	0,474345345907045	-1,92815971374512	A4D177;Q13185;S4R2Y4;C9JMM0;B8ZZ43;K7ELA4;B5MD17;J3KS05;Q6IBN6;V9HWG0;Q6I9T7;P83916;P45973	A4D177;Q13185	Chromobox protein homolog 3	CBX3	30.1	36.6	21.3	51.4	0	14.8		137;140	Color [Gray]	9	4						32	8	8	8	525	525	525	20811	0	87389	13898000	34	2316383,33333333	2,30974936485291	21,11889	21,44045	20,8741	22,46349	16,15538	20,02891	21,62446	20,41672
	0,365052806574787	1,46758460998535	Q9UES0;A4D2J0;O15498;B5BU81;O15498-2	Q9UES0;A4D2J0;O15498;B5BU81;O15498-2	Synaptobrevin homolog YKT6	YKT6	28.8	6.8	0	6.8	11	0		1	Color [Gray]	9	4						8	4	4	4	288	288	288	21606	0	16277	5011700	10	835275	0,279036819934845	21,25885	18,58002	16,83805	19,42004	20,42624	16,12033	18,47536	20,31683
	1,52110199714572	-1,57386175791422	A8K7S0;A5PLN4;Q8IWZ8;K7EM86;V9GZ08;A0A024R7N3	A8K7S0;A5PLN4;Q8IWZ8;K7EM86;V9GZ08;A0A024R7N3	SURP and G-patch domain-containing protein 1	SF4;SUGP1	0	2.3	0	1.7	0	0			Color [Gray]	9	4					2		2	2	2	4	4	4	72442	0	27691	409290	2	68215	∞	15,01233	17,53723	16,23331	17,7411	16,17434	16,86323	17,0578	16,75997
	0,426505149187329	-1,83876260121663	A6NEM2;P51610-2;P51610;P51610-4;Q05C05;P51610-3	A6NEM2;P51610-2;P51610;P51610-4;Q05C05;P51610-3	Host cell factor 1;HCF N-terminal chain 1;HCF N-terminal chain 2;HCF N-terminal chain 3;HCF N-terminal chain 4;HCF N-terminal chain 5;HCF N-terminal chain 6;HCF C-terminal chain 1;HCF C-terminal chain 2;HCF C-terminal chain 3;HCF C-terminal chain 4;HCF C-terminal chain 5;HCF C-terminal chain 6	HCFC1	0.8	4.7	0	2.5	2	0		601	Color [Gray]	9	4					12	1	7	7	7	55	55	55	21347	0	42481	4413500	15	735596,666666667	5,16611242294312	17,06255	21,30719	15,78981	20,073	19,14295	16,13141	20,23327	17,86419
	0,0285965696429655	-0,126414616902668	H0YD13;B4DN59;A8K309;P16070-18;P16070-12;P16070-14;P16070-13;P16070-11;P16070-10;P16070-16;P16070-8;P16070-17;P16070-6;P16070-4;P16070-3;P16070-7;P16070-5;P16070;H0Y2P0;H0YDW7;H0YCV9;H0Y5E4;P16070-15;P16070-9;E9PKC6;H0YE40;H0YDX6;H0YD17;B4E2X0;C1PHC4;C1PHC3;Q86UZ1;J3KN83;P16070-19	H0YD13;B4DN59;A8K309;P16070-18;P16070-12;P16070-14;P16070-13;P16070-11;P16070-10;P16070-16;P16070-8;P16070-17;P16070-6;P16070-4;P16070-3;P16070-7;P16070-5;P16070;H0Y2P0;H0YDW7;H0YCV9;H0Y5E4;P16070-15;P16070-9	CD44 antigen	CD44	0	0	17	10.2	0	6.3		189	Color [Gray]	9	4					6		5	5	5	291	291	291	22683	0	49755	2832000	6	471995	1,00181663036346	16,71388	16,61155	20,43206	19,98008	17,61369	18,54725	18,84972	18,8471
	0,053339128071577	0,179954528808594	A8K3Q9	A8K3Q9			12	12	6.5	12	5.1	11.6			Color [Gray]	9	4						6	3	1	1	171	65	65	23455	0	21131	3536300	6	589383,333333333	0,628273189067841	19,43198	18,55056	20,48198	19,37044	16,75476	18,20786	18,79497	19,4655
	0,22376353084503	-1,64381535847982	V9HWF5;A8K486;P62937;B2RE56;Q71V99;F8WE65;C9J5S7;B4DM82;P62937-2;E5RIZ5	V9HWF5;A8K486;P62937;B2RE56;Q71V99;F8WE65;C9J5S7;B4DM82;P62937-2	Peptidyl-prolyl cis-trans isomerase;Peptidyl-prolyl cis-trans isomerase A;Peptidyl-prolyl cis-trans isomerase A, N-terminally processed	HEL-S-69p;PPIA	23.6	0	0	16.4	5.5	58.2		100;136;142	Color [Gray]	9	4					12	6	9	9	9	582	582	582	18012	0	20479	28729000	17	4788275	15,7003717422485	20,71423	15,99718	16,06694	19,09339	18,03472	24,65676	23,10199	19,12927
	0,814224916301228	-1,95013491312663	Q6NZ55;A8K4C8;P26373;J3QSB4;P26373-2;O60250	Q6NZ55;A8K4C8;P26373;J3QSB4;P26373-2	60S ribosomal protein L13	RPL13	5.2	15.2	5.2	5.2	0	9		155	Color [Gray]	9	4					2	6	3	3	3	152	152	152	24265	0	19221	2531800	8	421963,333333333	7,23423433303833	16,86121	19,54789	17,52359	16,82786	16,49596	20,35542	19,49996	16,64512
	1,16067612272913	-3,8206345240275	Q59H57;B4DR70;A8K4H1;Q8TBR3;Q6IBQ5;Q13344;P35637-2;P35637;H3BPE7;Q70T18	Q59H57;B4DR70;A8K4H1;Q8TBR3;Q6IBQ5;Q13344;P35637-2;P35637;H3BPE7;Q70T18	RNA-binding protein FUS	FUS	0	18.3	4.7	21.7	4.7	21		238	Color [Gray]	9	4					13		5	5	4	297	297	297	31994	0	10973	16743000	17	2790461,66666667	8,47648525238037	15,34994	21,12136	19,72614	22,58573	19,77875	22,60964	22,25119	19,16772
	0,0829433412441154	-0,582000414530437	D6RAT0;Q6NXR8;A8K4W0;P61247;D6RG13;D6RB09;B7Z3M5;E9PFI5;D6R9B6;H0Y8L7;H0Y9Y4;D6RAS7;D6RED7;D6RGE0;D6RI02	D6RAT0;Q6NXR8;A8K4W0;P61247;D6RG13;D6RB09;B7Z3M5;E9PFI5;D6R9B6;H0Y8L7;H0Y9Y4;D6RAS7	40S ribosomal protein S3a	RPS3A	31.7	19.4	47.1	22.9	0	7.5	212	131;132;135;192	Color [Gray]	9	4					2	27	13	13	13	559	559	559	25887	0	10377	22439000	30	3739751,66666667	0,439214795827866	21,2921	20,80522	23,63456	22,03002	15,64586	19,48328	21,12223	22,30923
	1,69017309772292	-2,51377550760905	A8K517;P62266	A8K517;P62266	40S ribosomal protein S23	RPS23	7.7	7.7	0	7.7	0	7.7			Color [Gray]	9	4					1	3	1	1	1	77	77	77	15807	0	24501	1763700	4	293948,333333333	8,7376880645752	17,46659	18,36944	15,43324	18,91023	16,35747	19,51895	19,00887	15,88162
	0,353481915696206	-1,19200642903646	A8K5Q1;Q7L2J0;Q7L2J0-2	A8K5Q1;Q7L2J0;Q7L2J0-2	7SK snRNA methylphosphate capping enzyme	MEPCE	0	1.6	0	2.8	0	0			Color [Gray]	9	4					3		2	2	2	28	28	28	74326	0	4183	798050	3	133010	∞	15,02272	17,21949	15,58339	19,29995	17,63645	15,29914	18,02118	16,15285
	0,650086580936254	2,11231994628906	A8K5T7;Q9Y2Z0-2;Q9Y2Z0;A8K7W3;Q9P1S2;B4DYC6	A8K5T7;Q9Y2Z0-2;Q9Y2Z0;A8K7W3;Q9P1S2;B4DYC6	Suppressor of G2 allele of SKP1 homolog	SUGT1	28.8	10.4	12.1	10.7	14.5	0		82;333	Color [Gray]	9	4					7	15	10	10	10	359	359	359	41052	0	49425	7138800	25	1189803,33333333	0,382916033267975	20,91568	20,02351	19,80931	19,79689	21,11127	15,67892	19,32968	20,71458
	0,0822765396258349	0,351553281148274	I3L3Q4;B3KV49;B4DX01;B7Z403;A8K8F0;F6TLX2;Q9Y3E8;Q9HC38-2;Q9HC38;Q9HC38-3	I3L3Q4;B3KV49;B4DX01;B7Z403;A8K8F0;F6TLX2;Q9Y3E8;Q9HC38-2;Q9HC38	Glyoxalase domain-containing protein 4	GLOD4	3.5	4.4	9.3	4.4	0	0			Color [Gray]	9	4						5	3	3	3	128	128	128	255	0	43455	1803500	5	300581,666666667	0,638449013233185	17,29356	17,77063	19,84242	18,87012	16,01156	15,45215	17,83771	18,48507
	0,922034469583179	-1,67388534545898	K7EP06;Q05D80;A8K946;O43148;O43148-2;B7Z8S9;B7Z3U8	K7EP06;Q05D80;A8K946;O43148;O43148-2;B7Z8S9;B7Z3U8	mRNA cap guanine-N7 methyltransferase	RNMT	0	6.4	6.4	10.4	0	6.4			Color [Gray]	9	4					5		2	2	2	104	104	104	34839	0	29173	1448700	7	241450	4,58007860183716	15,38555	18,00569	17,98604	19,22185	17,09682	18,26252	18,59645	16,40108
	1,16456392950756	-3,20469506581625	M0R2J3;Q4LE74;M0R300;M0R0P8;B0I1T6;Q13459-2;Q13459	M0R2J3;Q4LE74;M0R300;M0R0P8;B0I1T6;Q13459-2;Q13459	Unconventional myosin-IXb	MYO9B;MYO9B variant protein	0	8	0	8	0	0			Color [Gray]	9	4					5	3	1	1	1	8	8	8	19803	71211	16199	5513000	8	918830	∞	16,83912	19,33141	15,86605	22,21054	17,30314	18,08046	20,80944	17,07397
	0,0550277060340629	-0,200396219889324	B0S8I6;Q14320;A0A024QZY3;Q9Y247	B0S8I6;Q14320	Protein FAM50A	FAM50A	15.4	20	5.4	14.2	10.4	0		33;183	Color [Gray]	9	4					4	10	5	5	5	20	20	20	30693	0	11254	8470500	15	1411753,33333333	1,34100914001465	20,76757	21,32592	18,61691	21,0844	20,44879	18,02415	20,62524	20,20193
	0,528578073904137	-2,45576349894206	E9PBK2;D6RAD0;E9PEK3;Q8NB69;B1ALB4;Q96N31;B4DLY0;E9PD50;Q92540-2;Q92540;Q92540-5;Q92540-4	E9PBK2;D6RAD0;E9PEK3;Q8NB69;B1ALB4;Q96N31;B4DLY0;E9PD50;Q92540-2;Q92540;Q92540-5;Q92540-4	Protein SMG7	SMG7	0	17.8	17.8	17.8	0	17.8	54;55	43	Color [Gray]	9	4					4		1	1	1	178	178	178	82684	10941	20436	11113000	5	1852145	2,91712021827698	16,54057	18,50947	21,43593	22,60132	16,32104	20,55403	21,39552	19,85097
	0,221565073034282	-0,855363845825195	Q32XH3;M0R3D6;M0R1A7;M0R117;B4DM74;B2R4C0;Q02543;M0R0P7;B4DM94;B4DUV3;Q53HD3	Q32XH3;M0R3D6;M0R1A7;M0R117;B4DM74;B2R4C0;Q02543;M0R0P7;B4DM94;B4DUV3;Q53HD3	60S ribosomal protein L18a	RPL18A	0	7.4	7.4	0	0	16.9			Color [Gray]	9	4					2	3	2	2	2	169	169	169	15791	0	95809	2078300	5	346383,333333333	10,5052032470703	16,96308	16,74268	17,46276	16,00267	16,52334	20,76991	19,27083	15,8778
	0,589037247293592	-4,06311861673991	B2R4R0;P62805;Q0VAS5;Q6B823	B2R4R0;P62805;Q0VAS5	Histone H4	HIST1H4H;HIST1H4A	0	9.7	17.5	27.2	0	52.4		85	Color [Gray]	9	4					11	8	8	8	8	524	524	524	11367	0	36836	116350000	20	19391420	549,944763183594	16,46829	16,3099	17,68811	20,1029	16,84323	26,77618	25,2063	16,10315
	0,0781642735540059	-0,711885452270508	V9HWH9;B2R5H0;P31949	V9HWH9;B2R5H0;P31949	Protein S100;Protein S100-A11;Protein S100-A11, N-terminally processed	HEL-S-43;S100A11	9.5	0	64.8	63.8	8.6	43.8	3	43;89	Color [Gray]	9	4					4	20	7	7	7	743	743	743	1174	0	19483	27765000	26	4627508	1,54845666885376	15,54918	16,06487	23,05608	22,15536	21,01958	23,54026	22,42301	21,79218
	0,70723678388665	-1,96676286061605	Q6IAU5;B2R665;O15355;B3KXL8;B4DDC8;Q96IN7;Q59GB2	Q6IAU5;B2R665;O15355;B3KXL8;B4DDC8	Protein phosphatase 1G	PPM1G	0	4.9	0	6.6	2	2.2		32	Color [Gray]	9	4					7		6	6	6	134	134	134	59271	0	11315	2533700	8	422288,333333333	2,09127187728882	16,23877	18,87679	15,55958	19,25566	19,64463	19,21081	19,12405	18,05967
	0,44970868766925	-2,39438819885254	Q53FC7;B3KSM6;B2R6X5;P17066;B4DHP5;P48741;E9PM13;Q96H53	Q53FC7;B3KSM6;B2R6X5;P17066;B4DHP5;P48741	Heat shock 70 kDa protein 6;Putative heat shock 70 kDa protein 7	HSPA6;HSPA7	0	4.2	7.5	12	8.7	12.6			Color [Gray]	9	4					5		8	1	1	14	17	17	71003	0	16076	14216000	5	2369355	14,5724945068359	15,27378	16,81102	19,19828	19,52468	18,24827	23,56779	22,08031	18,21514
	0,468353671366206	-1,10525639851888	B4DT28;B4DMB1;Q0VGD6;Q6MZS5;B2R7W4;O43390-4;O43390-3;O43390;O43390-2;B4DMD1	B4DT28;B4DMB1;Q0VGD6;Q6MZS5;B2R7W4;O43390-4;O43390-3;O43390;O43390-2;B4DMD1	Heterogeneous nuclear ribonucleoprotein R	HNRNPR;HNRPR;DKFZp686A13234	0	0	5.3	5.3	0	5.3			Color [Gray]	9	4					6		2	2	2	53	53	53	55717	0	5472	2135100	7	355856,666666667	3,71541523933411	17,41502	17,11493	18,78852	19,50125	16,93955	19,84267	19,09707	17,20355
	0,877979681178563	-1,76293754577637	B2R8R5;Q13263-2;Q13263;M0R0K9	B2R8R5;Q13263-2;Q13263;M0R0K9	Transcription intermediary factor 1-beta	TRIM28	0	8	3.7	3.7	0	5.5		423	Color [Gray]	9	4					7		4	4	4	98	98	98	88559	0	19225	2890000	10	481655	6,3623161315918	17,18359	19,6258	18,58244	17,84224	16,88419	20,471	19,66703	16,99748
	0,852392273862043	-1,74943351745605	Q05CK9;Q59GL1;B2R8Z8;O60506-4;O60506-3;O60506-2;O60506;F6UXX1;B7Z645;O60506-5;B7Z213	Q05CK9;Q59GL1;B2R8Z8;O60506-4;O60506-3;O60506-2;O60506;F6UXX1;B7Z645;O60506-5	Heterogeneous nuclear ribonucleoprotein Q	SYNCRIP	0	0	2.9	2.9	0	7.5			Color [Gray]	9	4					4		3	3	3	104	104	104	5065	0	95417	1272000	4	212000,5	15,3616399765015	15,91584	16,88962	16,24643	18,2276	17,46574	19,75909	18,60272	14,66146
	0,186673076171377	-0,863964080810547	V9HW51;B2R960;O43396;Q59G46;K7ER96;B3KT45;K7EML9;K7EKG2;K7EPB7;K7EME7	V9HW51;B2R960;O43396;Q59G46;K7ER96	Thioredoxin-like protein 1	HEL-S-114;TXNL1	35.3	15.9	0	11.4	0	5.2			Color [Gray]	9	4						14	7	7	7	353	353	353	32251	0	29991	5519600	15	919935	0,602906942367554	21,71544	20,03711	16,58071	19,4186	16,75953	18,19186	19,40049	20,13048
	0,120166734594438	0,315088272094727	B2R9R2;P98170;B1AKU2	B2R9R2;P98170;B1AKU2	E3 ubiquitin-protein ligase XIAP	XIAP	0	5.4	8.2	2.8	2.6	0		422	Color [Gray]	9	4					7		4	4	4	111	111	111	56623	0	69128	1825400	8	304230	0,484169453382492	16,45414	18,36743	19,45445	17,97309	18,96435	17,58714	17,59873	18,64515
	0,125129605815046	0,587266286214195	B4DU58;V9HW69;B2R9S4;P40121-2;P40121;E7ENU9;H7C0X8;B8ZZL6	B4DU58;V9HW69;B2R9S4;P40121-2;P40121;E7ENU9	Macrophage-capping protein	HEL-S-66;CAPG	15.6	3.7	6.7	3.7	3.7	17.1		240;299	Color [Gray]	9	4					4	9	6	6	6	229	229	229	36248	0	24884	5186200	14	864368,666666667	2,14768004417419	19,70893	16,14275	18,47136	17,32536	18,70452	21,65491	20,16978	19,067
	0,596003547406521	-1,32619031270345	B2RDE8;P51858;A8K8G0;B7Z958;P51858-2;P51858-3;B7Z525;H3BPQ6;Q8N4N4;M0R0J3;A0A024R216;Q05CM9;Q9Y3E1;O75475-3;O75475-2;O75475;Q7Z4V5-2;Q7Z4V5;Q7Z4V5-4;Q7Z4V5-3	B2RDE8;P51858;A8K8G0;B7Z958;P51858-2;P51858-3	Hepatoma-derived growth factor	HDGF	25.4	36.2	47.5	45.4	17.9	24.2		20;33	Color [Gray]	9	4					24	30	12	12	12	583	583	583	26805	0	38064	42514000	69	7085633,33333333	2,25768756866455	21,91218	23,63356	22,90892	23,61538	20,22823	21,77896	23,22746	22,05262
	0,470658866388154	-1,57686932881673	Q5RKT7;B2RDW1;P62979;J3QS39;J3QTR3;F5H6Q2;Q3MIH3;F5GYU3;F5H2Z3;F5H265;Q5UGI3;B4DV12;F5H388;F5H747;F5GXK7;J3QKN0;Q5U5U6;Q5PY61;Q9UFQ0;Q96C32;Q96MH4;L8B4I8;L8B196;Q96H31;L8B4R0;A8K674;L8B4Z6;L8B4M0;L8B4J3;Q66K58;Q59EM9;P62987;P0CG47;P0CG48;M0R1M6;Q8WYN9;M0R2S1;M0R1V7;Q49A90;J3QSA3;F5GZ39	Q5RKT7;B2RDW1;P62979;J3QS39;J3QTR3;F5H6Q2;Q3MIH3;F5GYU3;F5H2Z3;F5H265;Q5UGI3;B4DV12;F5H388;F5H747;F5GXK7;J3QKN0;Q5U5U6;Q5PY61;Q9UFQ0;Q96C32;Q96MH4;L8B4I8;L8B196;Q96H31;L8B4R0;A8K674;L8B4Z6;L8B4M0;L8B4J3;Q66K58;Q59EM9;P62987;P0CG47;P0CG48;M0R1M6;Q8WYN9;M0R2S1;M0R1V7;Q49A90	Ubiquitin-40S ribosomal protein S27a;Ubiquitin;40S ribosomal protein S27a;Ubiquitin-60S ribosomal protein L40;Ubiquitin;60S ribosomal protein L40;Polyubiquitin-B;Ubiquitin;Polyubiquitin-C;Ubiquitin	RPS27A;HEL112;UBB;UBC;UBA52;DKFZp434K0435;UbC	18.6	16	21.8	21.8	10.3	30.1			Color [Gray]	9	4					12	9	6	6	6	385	385	385	17905	0	3683	52098000	22	8682983,33333333	6,48629856109619	20,38617	20,64051	21,87744	21,83623	20,72733	25,24481	23,8429	21,14551
	0,874675274351162	-1,91966946919759	B2RTX8;Q7Z5K2;Q7Z5K2-2;Q7Z5K2-3;A8K273;Q8WVX6	B2RTX8;Q7Z5K2;Q7Z5K2-2;Q7Z5K2-3;A8K273	Wings apart-like protein homolog	WAPAL	0	3.8	1.1	4.9	0	0		381	Color [Gray]	9	4					8		4	4	4	49	49	49	13222	0	23107	1925000	10	320836,666666667	6,7847785949707	16,06293	18,96138	17,91579	20,15474	16,57431	17,19592	19,09312	16,33082
	0,385769226343857	-0,904256184895832	Q96FC3;B3KM90;Q643R0;Q9ULW0;Q9ULW0-2	Q96FC3;B3KM90;Q643R0;Q9ULW0;Q9ULW0-2	Targeting protein for Xklp2	TPX2;HCTP4	0	6.1	0	0	0	6.1			Color [Gray]	9	4					2		1	1	1	61	61	61	24867	42599	18885	684350	2	114058,333333333	∞	17,88157	17,19441	16,1834	16,445	15,88915	19,02748	17,79941	16,04933
	0,94280146784872	3,08606338500977	B3KPS3;P68363;B3KT06;A8JZY9;P68363-2;F8VVB9;B4DDU2;F8VQQ4;F8VRZ4;F8VS66;B4DN58;F8VX09;F8VWV9;C9JDS9;Q6QMJ5;C9K0S6;Q15670;A6NHL2-2;A6NHL2;F8VRK0;F8VXZ7;F8W0F6;Q9H853	B3KPS3;P68363;B3KT06;A8JZY9;P68363-2;F8VVB9;B4DDU2	Tubulin alpha-1B chain	TUBA1B	63.2	7.9	57.5	12.7	65.6	51.9		119;267;278;342;363;378	Color [Gray]	9	4					73	53	21	21	0	704	704	0	46241	0	18735	332180000	146	55363166,6666667	0,295812726020813	25,39074	21,26247	26,85781	22,12862	26,43517	26,03444	24,59132	26,34857
	1,40254854664767	-3,40352630615234	B3KRB2;Q96PZ0;B3KY42;E7EUH7;H0Y863	B3KRB2;Q96PZ0;B3KY42;E7EUH7	Pseudouridylate synthase 7 homolog	PUS7	0	20.1	7.9	21	4.4	8.5		1;3;6;377;529	Color [Gray]	9	4					20	4	14	14	14	31	31	31	75007	0	44021	8649900	29	1441671,66666667	7,83169794082642	16,38415	20,95319	19,68943	22,04823	17,03123	20,31396	21,28595	18,31662
	1,82521467775407	-3,18430010477702	B3KRR4;Q32Q83;Q6P392;Q8WUA2	B3KRR4;Q32Q83;Q6P392;Q8WUA2	Peptidyl-prolyl cis-trans isomerase-like 4	PPIL4	0	8.2	7.6	31.8	0	8.2		226	Color [Gray]	9	4					14		8	8	8	318	318	318	42047	0	97635	7021000	16	1170163,33333333	18,8176021575928	16,87331	19,97421	18,43453	22,03386	17,50414	20,35681	21,08358	16,84957
	1,38134580152192	-3,92159589131673	Q96BA7;B3KX72;B4DLR3;Q00839-2;Q00839;Q7Z4Q5;Q5RI18	Q96BA7;B3KX72;B4DLR3;Q00839-2;Q00839;Q7Z4Q5;Q5RI18	Heterogeneous nuclear ribonucleoprotein U	HNRNPU;HNRPU	0	9.4	3	11.9	5.1	8.6		210;431	Color [Gray]	9	4					19		8	8	8	14	14	14	79715	0	10775	20462000	21	3410410	9,93045139312744	16,25253	21,36581	18,73879	22,89876	20,45222	22,94376	22,56309	19,25123
	0,605765709085815	0,758395512898765	B4DDF4;Q6FHE4;B4DUT8;Q99439;A0A087X271;Q6FHC3;Q53GK7;B4DHU5;B4DN57;H3BVI6;Q99439-2;A0A087X1X5;K7ES69;H3BQH0;A0A087WV51;U3KPS3;Q15417-3;Q15417	B4DDF4;Q6FHE4;B4DUT8;Q99439;A0A087X271;Q6FHC3;Q53GK7;B4DHU5;B4DN57;H3BVI6;Q99439-2;A0A087X1X5;K7ES69	Calponin;Calponin-2	CNN2	28.9	24.5	26.5	17.4	14.1	5.7		64;79;148;159;170;210	Color [Gray]	9	4					6	26	12	12	12	423	423	423	32616	0	1411	13179000	33	2196433,33333333	0,613126695156097	21,9251	20,77981	21,16282	21,18198	20,81112	19,66206	20,67113	21,37687
	0,178135839897767	0,937362670898438	B4DEP6;E7EX17;B4DRM3;P23588;P23588-2;F8VSC7;F8VP89;F8W0K0;F8VX11;B4DS01;F8VYE9;Q7Z5Y0;F8VRU1;Q6AI40	B4DEP6;E7EX17;B4DRM3;P23588;P23588-2;F8VSC7;F8VP89;F8W0K0;F8VX11	Eukaryotic translation initiation factor 4B	EIF4B	9.4	18.6	33.9	23.2	49.2	27.1	341	509	Color [Gray]	9	4					89	10	29	29	29	525	525	525	66127	0	31724	328420000	133	54735616,6666667	0,344060122966766	21,71167	22,27304	25,82978	23,99852	27,43357	25,89136	24,74011	26,27938
	1,56421397296653	-2,03768539428711	B4DIH0;B4DQW0;E9PJ95;Q53FR9;Q9P000-2;Q9P000	B4DIH0;B4DQW0;E9PJ95;Q53FR9;Q9P000-2;Q9P000	COMM domain-containing protein 9	COMMD9	0	13.2	0	30.6	0	0			Color [Gray]	9	4						4	2	2	2	306	306	306	13471	0	2954	1022000	4	170328,333333333	∞	16,12461	19,39121	16,64949	18,35109	16,24495	17,38981	18,37796	14,65975
	0,916067887959822	-3,13907019297282	B4DJ39;O94842-3;O94842-2;O94842;B4DYA1;G8YXX4;O94900;O15405-2;O15405;H6UKR8;B4DQV8;Q96NM4-3;Q96NM4;Q96NM4-4;Q96NM4-2	B4DJ39;O94842-3;O94842-2;O94842	TOX high mobility group box family member 4	TOX4	0	15.7	2.4	17.5	3.1	1.8			Color [Gray]	9	4					16		8	8	8	188	188	188	5939	0	29204	8014300	20	1335726,66666667	11,406322479248	15,47519	21,47773	18,64188	22,00265	17,85422	17,90812	21,22795	17,71619
	0,184125813346342	-0,75630219777425	B4DLG2;O75152;E9PQ61;E9PBY7;B4DYM8;A0A024R8H9	B4DLG2;O75152;E9PQ61	Zinc finger CCCH domain-containing protein 11A	ZC3H11A	3.2	10.7	0	0	0	2.9			Color [Gray]	9	4					4	3	4	4	4	107	107	107	82771	0	69427	1307400	9	217900	4,914231300354	17,75408	19,49806	15,25036	15,06864	17,69327	18,39991	18,46608	16,16912
	0,116525781087987	-0,421382268269856	H3BU31;B4DMJ6;Q59GY2;P36578;B4DP82;H3BTP7;B4DFI6;H3BM89	H3BU31;B4DMJ6;Q59GY2;P36578;B4DP82;H3BTP7;B4DFI6;H3BM89	60S ribosomal protein L4	RPL4	6.4	6.4	6.4	0	0	15.8			Color [Gray]	9	4					4	1	2	2	2	158	158	158	18966	0	30668	1260100	5	210022	3,49325013160706	16,90372	15,30499	17,2681	17,39884	17,10893	19,84107	18,31699	16,51242
	0,825176421347311	-2,23132832845052	Q59FU3;B4E0X8;B4DWL1;E9PEB5;B4DT31;Q96AE4;Q96AE4-2;Q6PJY1;A0A024R8A7;Q96I24-2;Q96I24	Q59FU3;B4E0X8;B4DWL1;E9PEB5;B4DT31;Q96AE4;Q96AE4-2;Q6PJY1	Far upstream element-binding protein 1	FUBP1	0	7.1	0	7.3	0	2.6			Color [Gray]	9	4					7		4	4	4	91	91	91	52064	0	81219	2165700	7	360941,666666667	∞	16,03707	19,85931	16,78663	20,21193	16,93657	16,38301	19,46141	15,86251
	0,405924228921662	-2,63131904602051	B4DUI5;V9HWK1;P60174-1;P60174;Q53HE2;P60174-4;U3KPZ0;U3KQF3;Q2QD09;U3KPS5	B4DUI5;V9HWK1;P60174-1;P60174;Q53HE2;P60174-4;U3KPZ0;U3KQF3;Q2QD09	Triosephosphate isomerase	HEL-S-49;TPI1	10.3	5.6	0	0	0	64.3			Color [Gray]	9	4					13	3	11	11	11	643	643	643	22871	0	49377	25905000	16	4317531,83333333	119,137229919434	17,7182	16,51362	16,06328	16,55769	16,00529	24,60942	23,02972	16,13324
	0,618736589547795	-1,08664608001709	B4DUT7;Q53F90;P49915-2;P49915	B4DUT7;Q53F90;P49915-2;P49915	GMP synthase [glutamine-hydrolyzing]	GMPS	0	2	1.7	2	0	0		278	Color [Gray]	9	4					3		2	2	2	37	37	37	7124	0	33593	380840	4	63471,6666666667	∞	14,96222	17,35113	16,99079	17,70482	15,82137	15,97836	16,95382	13,93097
	0,194326280888664	-0,661397933959961	B4DWW6;B4DW61;Q8IZ73;Q8IZ73-2;A0A087WXE2	B4DWW6;B4DW61;Q8IZ73;Q8IZ73-2	RNA pseudouridylate synthase domain-containing protein 2	RPUSD2	0	2.1	0	11.1	0	0			Color [Gray]	9	4					4		4	4	4	132	132	132	59218	0	65739	1519500	5	253248,333333333	∞	16,85414	16,93376	17,27902	20,41111	17,4493	16,22179	18,95019	13,78442
	1,18157630067003	2,00128746032715	B4DY28;P21291;Q9BTA4;B4E2T4;E9PS42;Q59EQ5;Q6ZMS3;E9PND2;E9PP21;B3KVC9;Q6AI18;Q6AWD1	B4DY28;P21291;Q9BTA4;B4E2T4;E9PS42;Q59EQ5;Q6ZMS3;E9PND2;E9PP21;B3KVC9;Q6AI18	Cysteine and glycine-rich protein 1	CSRP1;DKFZp686M148	64.2	28.9	59.9	28.3	45.5	36.4	69	38	Color [Gray]	9	4					5	42	11	11	11	69	69	69	20042	0	60892	64283000	58	10713816,6666667	0,216548323631287	24,29025	21,06789	24,67944	22,20526	22,37925	22,07192	21,86294	24,07018
	1,11762602807945	-2,9360564549764	B4DZR9;Q9UQR0;B4DRC2;H0Y6S1	B4DZR9;Q9UQR0;B4DRC2	Sex comb on midleg-like protein 2	SCML2	0	18.2	5	13.5	1.9	2.3			Color [Gray]	9	4					15	2	7	7	7	182	182	182	63261	0	25228	6380400	22	1063411,66666667	7,75055885314941	15,84237	21,08427	18,93753	21,50393	17,79284	18,79271	20,84519	17,89089
	1,38188538695571	-4,85096391042073	B4E0S6;O43143	B4E0S6;O43143	Pre-mRNA-splicing factor ATP-dependent RNA helicase DHX15	DHX15	0	9.6	0	14.9	4.6	4.6		167;188;235;262;280;483	Color [Gray]	9	4					28		13	13	13	185	185	185	89546	0	89512	17060000	30	2843366,66666667	14,3917360305786	15,30188	21,22329	16,02819	23,36159	20,08005	21,37814	22,34225	18,49508
	0,0217608343969843	0,129271189371746	B4E2Z3;F5GZS6;J3KPF3;P08195-2;P08195-3;P08195;P08195-4;A0A024R599;H0YFS2;F5H0E2;F5H867;B4E3E4;H0YFX4;F5GZI0	B4E2Z3;F5GZS6;J3KPF3;P08195-2;P08195-3;P08195;P08195-4;A0A024R599;H0YFS2	4F2 cell-surface antigen heavy chain	SLC3A2	0	0	5.7	12.3	4.3	2.3			Color [Gray]	9	4					11		7	7	7	155	155	155	55939	0	12402	3583600	12	597268,333333333	1,43647086620331	16,01326	15,19387	19,14567	20,70033	19,76479	18,64171	19,42575	18,90323
	0,0112873580396134	-0,106980641682945	B4E3S0;F8VV53;H0YHL7;B7Z9V0;B4DMH3;Q53G58;B3KN06;A0A024RBI5;Q59EA2;Q9ULV4;Q9ULV4-2;Q9ULV4-3	B4E3S0;F8VV53;H0YHL7;B7Z9V0;B4DMH3;Q53G58;B3KN06;A0A024RBI5;Q59EA2;Q9ULV4;Q9ULV4-2;Q9ULV4-3	Coronin;Coronin-1C	CORO1C	0	0	6.8	6.8	6.8	7.9	26		Color [Gray]	9	4					5		2	2	2	146	146	146	41603	0	32	20236000	6	3372790	3,46510314941406	15,50583	15,25817	21,7446	23,87258	19,95787	18,39849	22,31972	20,52682
	1,76146235330244	2,82619794209798	B5BUB1;Q9Y265;Q9Y265-2;E7ETR0;B3KRS7;H7C4G5;J3QLR1;H7C4I3	B5BUB1;Q9Y265;Q9Y265-2;E7ETR0;B3KRS7	RuvB-like 1	RUVBL1	45.4	16.7	42.3	28.9	40.6	12.9		96;147;364;371	Color [Gray]	9	4					54	28	18	18	18	509	509	509	50215	0	15345	86140000	92	14356633,3333333	0,15015621483326	23,5636	20,60964	24,89514	22,57644	24,89938	21,69345	21,83792	24,57338
	1,25894721029349	-2,32052294413248	B5MCP9;P62081;Q59FS3	B5MCP9;P62081;Q59FS3	40S ribosomal protein S7	RPS7	0	6.4	0	0	0	11.8			Color [Gray]	9	4					1	1	2	2	2	182	182	182	21312	11351	22424	1250300	2	208390	∞	16,12074	18,52539	15,87366	16,76724	16,07235	19,73567	18,66893	13,38354
	1,12877716546026	-2,77912044525146	B5MDF5;P62826;J3KQE5;F5H018;H0YFC6;B4DV51;A0A087X0W0;Q96QB7;Q0EFC9	B5MDF5;P62826;J3KQE5;F5H018	GTP-binding nuclear protein Ran	RAN	9	10.3	0	6	0	21.5			Color [Gray]	9	4					4	5	5	5	5	262	262	262	26224	0	93417	3998000	9	666340	10,1183290481567	18,45599	18,9383	15,76669	18,77382	16,51012	21,35805	20,20993	16,87103
	1,08362066924367	2,42787996927897	B7Z4B7;B7Z5T3;B7Z6U8;B7Z5V0;Q53FI7;Q13642-1;Q13642-5;Q13642-4;Q5JXI8;B7Z9A1;Q13642;Q5JXH8;Q5JXH7;Q5JXI3;A0A0D9SFZ9;Q5JXI2;Q13642-3;A0A0D9SFI6;A0A0D9SFB0;Q5JXH9;B3KRI9;A0A0D9SGB2;Q5JXI0;A0A0D9SG53	B7Z4B7;B7Z5T3;B7Z6U8;B7Z5V0;Q53FI7;Q13642-1;Q13642-5;Q13642-4;Q5JXI8;B7Z9A1;Q13642;Q5JXH8;Q5JXH7;Q5JXI3;A0A0D9SFZ9;Q5JXI2;Q13642-3	Four and a half LIM domains protein 1	FHL1	32.3	11.3	30.6	4.8	6	0			Color [Gray]	9	4					5	12	7	7	7	407	407	407	28097	0	52777	8085200	20	1347535	0,128473788499832	21,79273	18,53731	21,53825	19,04271	18,89128	17,3586	18,22706	21,18752
	0,636613276168842	3,28390185038249	E5RGX5;B7Z4N6;Q93045;Q93045-2	E5RGX5;B7Z4N6;Q93045;Q93045-2	Stathmin;Stathmin-2	STMN2	11.9	11.3	11.3	11.3	11.3	11.3			Color [Gray]	9	4					2	6	3	1	1	119	6	6	19574	0	1013	53441000	8	8906843,33333333	0,396472811698914	21,60168	18,91841	24,73262	16,53835	22,78121	23,80705	22,26999	23,60469
	0,0180463294680271	-0,0626007715860979	B7Z5N6;Q5T1V6-2;Q5T1V6;H0Y6Y1;Q5T1W1;B7ZBU3;H0Y7Z8	B7Z5N6;Q5T1V6-2;Q5T1V6;H0Y6Y1;Q5T1W1;B7ZBU3	Probable ATP-dependent RNA helicase DDX59	DDX59	0	1.9	0	3.5	0	0			Color [Gray]	9	4					3		3	3	3	55	55	55	62777	0	5018	523210	4	87201,6666666667	∞	18,39508	16,82799	15,80934	18,63421	16,71542	15,64544	17,41207	15,98196
	0,0232451816943125	0,0746243794759138	K7EIJ4;B7Z5P4;Q308M8;B7Z7F3;Q9H6Z4-3;Q9H6Z4-2;Q9H6Z4;Q53GE1	K7EIJ4;B7Z5P4;Q308M8;B7Z7F3;Q9H6Z4-3;Q9H6Z4-2;Q9H6Z4;Q53GE1	Ran-binding protein 3	RANBP3	0	9.7	0	17.4	0	0		28;75	Color [Gray]	9	4					3		2	2	2	174	174	174	16965	0	28955	503640	4	83940,1666666667	∞	17,62667	16,34674	16,4852	18,68106	16,43742	15,29762	17,35707	15,24034
	0,432783824814705	-1,05073420206706	B7ZLC8;Q15652-2;Q15652-3;Q15652;A0PJE4;H7BXU7	B7ZLC8;Q15652-2;Q15652-3;Q15652	Probable JmjC domain-containing histone demethylation protein 2C	JMJD1C	0	1.2	1.2	1.7	0.5	0.5			Color [Gray]	9	4					9		3	3	3	17	17	17	26315	0	88661	2395200	10	399203,333333333	1,43481004238129	16,09677	18,42522	19,58846	19,2396	17,57607	18,74868	18,84381	18,32295
	0,462551194756622	-1,6920108795166	C9J4K0;Q9BVC5-2;Q9BVC5	C9J4K0;Q9BVC5-2;Q9BVC5	Ashwin	C2orf49	19.5	24.2	0	10.5	0	0			Color [Gray]	9	4						6	4	4	4	332	332	332	21356	0	59552	2109600	8	351600	2,50402784347534	19,19952	19,71912	15,86397	19,29778	15,34694	16,46956	18,93881	17,61456
	0,0104170743201996	-0,140078226725258	C9JNV2;P41223;P41223-2	C9JNV2;P41223;P41223-2	Protein BUD31 homolog	BUD31	9.6	9.6	9.6	16.5	9.6	9.6	11	1	Color [Gray]	9	4					7	11	2	2	2	165	165	165	13568	0	32671	1445800000	20	240969335,666667	1,32767391204834	28,50453	26,97793	18,68682	19,10546	27,83786	29,36605	28,03429	27,62539
	0,271291438079501	1,25241915384929	D3DUG9;P54578-2;P54578;A6NJA2;B2RD79;P54578-3;B3KTG4;J3QQT6;J3KS55	D3DUG9;P54578-2;P54578;A6NJA2;B2RD79;P54578-3;B3KTG4	Ubiquitin carboxyl-terminal hydrolase;Ubiquitin carboxyl-terminal hydrolase 14	USP14	0	6.6	28.8	5.1	2.8	0		120;462	Color [Gray]	9	4					13		8	8	8	288	288	288	53092	0	35994	6662100	16	1110351,66666667	0,235110148787498	16,76114	18,79861	22,13705	19,63146	19,57615	16,28701	18,68935	20,77795
	0,517522725578613	-2,75498898824056	D6RAC2;J3KPE3;E9KL35;P63244;H0YAF8;D6RHH4;D6REE5;D6RHJ5;D6RF23;H0Y8R5;D6RBD0;H0YAM7;H0Y8W2;D6RDI0;D6RGK8;H0Y9P0;D6R909;D6RAU2;E9PD14;B4E0C3;B4DWC6;D6RFX4;D6RFZ9;B4DVD2;D6R9Z1;D6R9L0	D6RAC2;J3KPE3;E9KL35;P63244;H0YAF8;D6RHH4;D6REE5;D6RHJ5;D6RF23;H0Y8R5;D6RBD0;H0YAM7;H0Y8W2	Guanine nucleotide-binding protein subunit beta-2-like 1;Guanine nucleotide-binding protein subunit beta-2-like 1, N-terminally processed	GNB2L1	0	0	0	4.5	0	15.6	12	1	Color [Gray]	9	4					4	1	4	4	4	201	201	201	2975	0	74826	7187400	5	1197908,33333333	∞	14,73739	15,16852	16,93436	19,88442	17,68461	22,56839	21,19209	14,8861
	0,47020467830635	-1,44279861450195	D6RIE8;Q16594;D6RHW1;D6RIY1;D6RGK3;D6RIV9	D6RIE8;Q16594;D6RHW1;D6RIY1;D6RGK3;D6RIV9	Transcription initiation factor TFIID subunit 9	TAF9	14.1	23.7	0	4	0	0		170	Color [Gray]	9	4						4	3	3	1	237	237	141	21778	0	10452	1984300	5	330713,333333333	6,48191976547241	18,01678	20,38732	16,55235	18,40694	16,12971	16,23296	19,12823	16,43181
	0,203641757015789	0,706786473592121	D9IAI1;P30086;A0A0K0K1J6;V9HW05;B4DRT4	D9IAI1;P30086;A0A0K0K1J6;V9HW05;B4DRT4	Phosphatidylethanolamine-binding protein 1;Hippocampal cholinergic neurostimulating peptide	HEL-S-34;PEBP1;HEL-210	18.7	10.7	50.3	18.7	10.7	28.3			Color [Gray]	9	4					3	14	5	5	5	503	503	503	21057	0	22316	13010000	18	2168265	0,813372850418091	20,67564	18,1203	22,14976	20,23374	19,69073	22,04173	20,89142	21,18943
	0,249569131160616	-0,644591967264809	E5RFX4;V9HWH0;Q96KB5;Q96KB5-2	E5RFX4;V9HWH0;Q96KB5;Q96KB5-2	Lymphokine-activated killer T-cell-originated protein kinase	PBK;HEL164	6	6	6	6	0	0			Color [Gray]	9	4						4	1	1	1	6	6	6	17075	11287	21936	640680	4	106780	1,63123738765717	17,8935	17,35621	15,13488	17,80757	15,97489	15,77328	17,01451	16,30854
	0,0194255186655721	-0,0777346293131487	E7EQ69;Q9GZZ1;C9J5D1;A0A087WWJ2;Q9GZZ1-2;B0AZT5;C9J5J3;A0A0D9SF32;C9JZU6;F8WCK0	E7EQ69;Q9GZZ1;C9J5D1;A0A087WWJ2;Q9GZZ1-2	N-alpha-acetyltransferase 50	NAA50	55.4	39.3	39.3	40.5	22.6	22.6		74	Color [Gray]	9	4						39	15	15	15	565	565	565	19311	0	87664	18962000	40	3160260	0,832392394542694	22,86015	21,86559	21,02736	21,95141	19,18756	19,49127	21,45322	21,71788
	0,743372721512353	4,40427525838216	E7EVA0;Q86Y04;P27816;P27816-4;P27816-6;B5MEG9;P27816-2;P27816-5;B4DM10;A0A024R2V2;A0A024R2S1;Q6NX68;A0A024R2V0;Q05D06;H7C4C5;H0Y2V1;H7C456;F8W9U4;B4DSQ1;Q8NDS5;A0A0J9YVV8;A0A0J9YW37;P27816-7	E7EVA0	Microtubule-associated protein	MAP4	0.5	0.6	42.2	1	3.9	0		160;245;259;260;295;309;313;317;323;379;387;495;557;784;785;974;1284;1495;1554;1732;1774;1778;1782;1886	Color [Gray]	9	4					92	1	71	71	71	433	433	433	24544	0	24627	132130000	110	22022956,6666667	0,00437473691999912	17,63743	18,16325	26,92818	18,10534	21,80274	16,88695	17,54962	25,38621
	0,671394792345633	-2,30690797170003	E9PBF6;P20700;Q6DC98;A0A0D9SFY5;A0A0D9SFE5	E9PBF6;P20700;Q6DC98	Lamin-B1	LMNB1	0	2.6	0	0	0	4.4	109;111		Color [Gray]	9	4					1	2	3	2	1	7	49	23	44643	0	24635	2867100	3	477853,333333333	∞	17,00054	19,145	16,6961	15,96797	15,62088	21,12528	19,86621	17,1511
	0,465477873601593	-3,1676762898763	Q6ZRA8;E9PBI4;Q59GM4;Q14289-2;Q14289	Q6ZRA8;E9PBI4;Q59GM4;Q14289-2;Q14289	Protein-tyrosine kinase 2-beta	PTK2B	0	1.8	1.8	1.8	0	1.8	225	224	Color [Gray]	9	4					2	4	1	1	1	18	18	18	68031	0	43927	44758000	8	7459725	2,88864898681641	16,64713	18,34234	23,45638	24,14227	16,65763	23,77957	23,40182	21,87142
	0,726194138717064	-1,89575036366781	E9PP36;E9PKZ0;E9PKU4;P62917	E9PP36;E9PKZ0;E9PKU4;P62917	60S ribosomal protein L8	RPL8	0	7.4	0	0	0	7.4			Color [Gray]	9	4					1	1	1	1	1	74	74	74	1618	0	44343	1302100	1	217026,666666667	∞	16,32241	16,87939	15,43802	16,50559	16,10962	20,17231	18,72751	15,38113
	2,12278630446425	-2,51601982116699	Q9BQQ5;E9PLL6;Q6NZ52;P46776;E9PJD9;E9PLX7	Q9BQQ5;E9PLL6;Q6NZ52;P46776;E9PJD9;E9PLX7	60S ribosomal protein L27a	L27a;RPL27A	0	45.3	0	10.4	0	12.3			Color [Gray]	9	4					1	4	4	4	4	453	453	453	12015	0	71079	1922200	5	320365	∞	16,09544	19,35511	17,58081	19,60933	16,5253	18,78517	19,28936	14,90401
	0,0947398584677239	0,25330098470052	E9PP76;J3KNF4;O14618	E9PP76;J3KNF4;O14618	Superoxide dismutase [Cu-Zn];Copper chaperone for superoxide dismutase	CCS	39.7	19.1	0	19.1	0	0		1	Color [Gray]	9	4						4	2	2	2	397	397	397	72852	0	32165	1145000	4	190833,333333333	0,629429340362549	19,42255	16,94364	16,44833	18,27071	18,16494	18,06158	17,1697	17,83759
	1,86242207621359	-4,38005193074544	E9PPH5;Q53F20;Q9BTT0-3;Q9BTT0;Q5TB19;B4E0D5;E9PLC4;Q9BTT0-2	E9PPH5;Q53F20;Q9BTT0-3;Q9BTT0	Acidic leucine-rich nuclear phosphoprotein 32 family member E	ANP32E	0	37.7	0	26.3	0	12.3			Color [Gray]	9	4					1	8	4	4	4	377	377	377	13128	0	12783	5214900	9	869150	∞	16,11594	21,29743	16,50242	21,13189	15,04469	18,3739	20,72925	14,14419
	1,38653835652466	-2,73510106404623	E9PRR7;Q14331;E9PLY7;Q9BZ01	E9PRR7;Q14331	Protein FRG1	FRG1	0	35.3	0	13.8	0	25		84	Color [Gray]	9	4						6	3	3	3	353	353	353	12516	0	10315	2948900	6	491478,333333333	∞	18,00566	20,54369	16,04659	18,21831	16,59357	20,08913	19,90677	14,6511
	0,854547495660251	-2,16930898030599	F2Z393;P37837	F2Z393;P37837	Transaldolase	TALDO1	0	7.5	3.5	3.5	3.5	6.9			Color [Gray]	9	4					3	5	3	3	3	11	11	11	35328	0	33109	5354600	8	892431,666666667	3,28147983551025	16,3155	19,86127	19,96888	19,50922	17,77597	21,19779	20,38362	18,66927
	0,722122799579408	1,22156397501628	Q6IPN0;F8W914;Q9NQC3-2;Q9NQC3-5;Q9NQC3;Q53SY1;A6XGP7;H7C106;D6W5C2;Q9NQC3-3;Q9NQC3-4;Q9NQC3-6;A0A0U1RQR6;Q3LIF4;Q53R94	Q6IPN0;F8W914;Q9NQC3-2;Q9NQC3-5;Q9NQC3;Q53SY1;A6XGP7;H7C106;D6W5C2;Q9NQC3-3;Q9NQC3-4;Q9NQC3-6	Reticulon;Reticulon-4	RTN4;NOGOC	21.9	30.6	34.1	21.9	22.2	3.8		49	Color [Gray]	9	4					18	17	7	7	7	341	341	341	36918	0	25143	29463000	39	4910416,66666667	0,356999754905701	22,09226	20,89667	23,77836	21,8939	21,44364	20,85901	21,30099	22,78699
	0,640132250515175	-2,33292452494304	F8WJN3;Q16630-3;Q16630;Q16630-2;B4DSU9	F8WJN3;Q16630-3;Q16630;Q16630-2;B4DSU9	Cleavage and polyadenylation specificity factor subunit 6	CPSF6	0	11.5	5.2	14.2	0	0		345	Color [Gray]	9	4					10		5	5	5	176	176	176	52269	0	2745	4347300	12	724556,666666667	17,9807014465332	16,16867	20,58334	17,80524	21,28048	17,1385	16,24736	20,38865	16,22028
	0,834468329774492	-1,35143025716146	G1UD80;G1UD79;Q7Z309-4;Q7Z309;Q7Z309-2;Q7Z309-3;B4DN12;Q7Z309-5	G1UD80;G1UD79;Q7Z309-4;Q7Z309;Q7Z309-2;Q7Z309-3;B4DN12;Q7Z309-5	Protein FAM122B	SPACIA2;FAM122B	14.9	31.5	14.9	24.1	5.8	5.8		6;146	Color [Gray]	9	4					4	15	5	5	5	315	315	315	27209	0	97931	9753300	21	1625548,33333333	2,84581327438354	19,47203	21,94724	20,29659	21,13515	18,99081	19,73133	21,19805	19,68921
	0,804584823697397	-1,91786130269368	G3V1B3;M0R181;Q6IAX2;Q59GK9;P46778	G3V1B3;M0R181;Q6IAX2;Q59GK9;P46778	60S ribosomal protein L21	RPL21	0	17.2	0	0	0	17.2			Color [Gray]	9	4					1	1	1	1	1	172	172	172	98864	0	22762	2049100	2	341516,666666667	∞	16,53273	18,48385	16,98372	16,90833	16,80432	20,68217	19,3816	13,88551
	0,198666451122623	-0,355762163798016	G3V5A4;G3V401;G3V2X0;Q0VGA3;Q9Y5B9	G3V5A4;G3V401;G3V2X0;Q0VGA3;Q9Y5B9	FACT complex subunit SPT16	SUPT16H	0	16.7	0	16.7	0	0			Color [Gray]	9	4					2		1	1	1	167	167	167	75553	0	44369	374710	2	62451,6666666667	∞	15,73888	16,88667	17,37529	17,95185	16,95583	16,29876	16,93045	15,13257
	1,25638982100658	-3,32456334431966	G3V3A4;Q13573;Q6I9S2;B4DEG7;B7Z9X2;B4DY36;A0A024R6E3;Q6P151;G3V4X8;Q0D2M5;Q9ULA6;G3V5R3	G3V3A4;Q13573;Q6I9S2;B4DEG7;B7Z9X2;B4DY36;A0A024R6E3;Q6P151;G3V4X8;Q0D2M5	SNW domain-containing protein 1	SNW1	0	14.7	3.9	16.8	8.8	10.5		76;82;163	Color [Gray]	9	4					21	1	11	11	11	259	259	259	65391	0	60069	12231000	26	2038534,16666667	5,66331005096436	17,86888	21,44794	16,55382	21,70927	20,73016	21,96934	21,72451	19,22286
	0,767394765753931	-1,25278282165527	G3V5Q1;G3V3M6;Q5TZP7;P27695;A0A0C4DGK8;H7C4A8;G3V5M0;G3V359;G3V3C7	G3V5Q1;G3V3M6;Q5TZP7;P27695	DNA-(apurinic or apyrimidinic site) lyase;DNA-(apurinic or apyrimidinic site) lyase, mitochondrial	APEX1	9.1	12.8	0	4.5	0	7			Color [Gray]	9	4						5	4	4	4	244	244	244	27125	0	48854	1040700	5	173456,666666667	4,47873258590698	17,53534	18,37708	16,00203	18,61788	16,42045	16,72121	18,11346	15,95037
	0,350145306223871	-0,613066355387371	H0YNW5;P33316-2;P33316;A0A0C4DGL3;H0YKC5;H0YMM5;H0YNJ9;H0YKI0;H0YMP1	H0YNW5;P33316-2;P33316;A0A0C4DGL3;H0YKC5;H0YMM5;H0YNJ9;H0YKI0;H0YMP1	Deoxyuridine 5-triphosphate nucleotidohydrolase, mitochondrial	DUT	12	34.1	53.3	40.7	24.6	50.3	166	27	Color [Gray]	9	4					2	31	9	9	9	593	593	593	17827	0	24308	24325000	33	4054100	1,61088812351227	20,62221	21,03792	22,1934	22,08453	21,4709	23,00326	22,25427	21,56641
	1,9011879711459	-3,82651519775391	H3BLZ8;Q59F66;Q92841-1;Q92841-3;Q92841-2;Q92841;Q9UQL5	H3BLZ8;Q59F66;Q92841-1;Q92841-3;Q92841-2;Q92841	Probable ATP-dependent RNA helicase DDX17	DDX17	0	6.4	0	3.4	0	3.6			Color [Gray]	9	4					8		6	6	2	98	98	36	80439	0	85248	2746000	8	457661,666666667	∞	16,87961	18,87108	14,32406	20,16226	16,41012	20,05999	19,80392	16,17459
	0,157974451055004	0,988187154134113	I3L1Y9;Q96CP2;I3L4I0	I3L1Y9;Q96CP2;I3L4I0	FLYWCH family member 2	FLYWCH2	0	0	29.2	21.5	18.8	16			Color [Gray]	9	4					4	9	5	5	5	347	347	347	15604	0	60254	10637000	13	1772850	0,641046583652496	17,23184	15,4842	22,07408	21,36608	20,97883	20,46991	20,40152	21,04302
	1,72026219156298	-4,58356062571207	I7GPQ7;Q92541;H0YKX1	I7GPQ7;Q92541	RNA polymerase-associated protein RTF1 homolog	RTF1	0	5.8	2.1	12.3	0	2.1			Color [Gray]	9	4					11	1	7	7	7	123	123	123	67155	0	21643	8386100	13	1397670	27,3867721557617	16,53101	20,20979	18,17241	22,34047	14,67592	20,57976	21,36285	16,58745
	0,174333176607501	0,662814458211265	J3KNC0;P52655	J3KNC0;P52655	Transcription initiation factor IIA subunit 1;Transcription initiation factor IIA alpha chain;Transcription initiation factor IIA beta chain	GTF2A1	18.6	18.6	66.1	47.5	18.6	18.6		40	Color [Gray]	9	4					5	8	3	3	3	661	661	661	67407	0	31369	7007600	15	1167933,33333333	1,24888718128204	20,19388	16,85392	20,4108	21,60531	18,99543	19,15244	20,30696	19,98631
	0,0976299079770977	0,472640355428059	J3KT51;Q9UK76;Q9UK76-2;J3KSH8;Q9UK76-3	J3KT51;Q9UK76;Q9UK76-2;J3KSH8;Q9UK76-3	Hematological and neurological expressed 1 protein;Hematological and neurological expressed 1 protein, N-terminally processed	HN1	38.5	0	54.8	14.4	0	37.5		47	Color [Gray]	9	4						9	5	5	5	558	558	558	11012	0	17891	3875100	10	645861,666666667	0,640054523944855	18,71575	15,90006	20,88189	18,92995	16,60036	19,95006	18,94339	19,58712
	0,234216776572989	-0,757129033406574	J3QRS9;Q59G94;X6R4W8;O43670-2;O43670;O43670-4;O43670-3;Q8N395;J3KS31;B4DQT7;J3QS27;J3KTL1;J3KRB6;J3KRW6;H0Y3M2	J3QRS9;Q59G94;X6R4W8;O43670-2;O43670;O43670-4;O43670-3;Q8N395;J3KS31;B4DQT7	BUB3-interacting and GLEBS motif-containing protein ZNF207	ZNF207;DKFZp761N202	0	4.1	7.7	8.1	0	2.6			Color [Gray]	9	4					9		5	5	5	108	108	108	52541	0	61293	2967400	10	494561,666666667	1,69418013095856	16,65914	17,37016	20,07091	19,77262	17,75258	19,61123	19,24653	18,48594
	0,0597681506605624	0,270899772644043	K4DI93;Q13620-1;Q13620;Q13620-3;A0A087WWN2;A6NE76;B2RBV7;A0A0A0MR50;Q13619-2;Q13619	K4DI93;Q13620-1;Q13620;Q13620-3	Cullin-4B	CUL4B	0	0	4.4	2.2	0	1.8			Color [Gray]	9	4					6		4	4	4	53	53	53	10275	0	1047	1522300	7	253718,333333333	1,17836952209473	16,08873	14,99279	19,41458	19,1859	17,28098	17,7929	18,06641	17,82962
	0,66637765194195	-2,77444044748942	K7EJT5;K7EP65;K7EKS7;K7ELC4;K7EMH1;K7ERI7;Q7Z4W8;P35268	K7EJT5;K7EP65;K7EKS7;K7ELC4;K7EMH1;K7ERI7;Q7Z4W8;P35268	60S ribosomal protein L22	RPL22	0	23.4	0	0	0	51.1			Color [Gray]	9	4					2	1	2	2	2	511	511	511	50827	0	45113	4718800	3	786463,333333333	∞	15,44036	17,47896	14,87822	16,75324	17,70333	22,11302	20,58502	16,06592
	0,415338174175112	0,740479151407879	K7EK42;Q99426;K7EP07;Q99426-2;K7EL99;K7EQH0;K7ER04	K7EK42;Q99426;K7EP07;Q99426-2;K7EL99	Tubulin-folding cofactor B	TBCB	37.7	14.1	5.8	9.9	10.5	0			Color [Gray]	9	4						13	6	6	6	377	377	377	21296	0	88077	4598000	13	766343,333333333	0,350523561239243	21,14892	18,77607	18,84616	19,50591	19,21416	18,70583	18,6017	20,11411
	0,0127562147032845	-0,0277519226074219	M0QY97;Q9UPT8	M0QY97;Q9UPT8	Zinc finger CCCH domain-containing protein 4	ZC3H4	0	2.3	1.4	1.8	0	0			Color [Gray]	9	4					3		3	3	3	55	55	55	95425	0	57055	174620	3	29104,1666666667	∞	15,92277	15,84267	15,53688	16,82202	17,67207	16,55028	15,82894	16,01121
	1,92604722218474	3,08275922139486	V9HW92;O00151	V9HW92;O00151	PDZ and LIM domain protein 1	HEL-S-112;PDLIM1	70.8	21.6	76	39.2	51.1	25.8	329	61;104;125;259	Color [Gray]	9	4					33	61	21	21	21	818	818	818	36071	0	17942	128700000	112	21450950	0,133940950036049	25,00838	20,75467	25,65116	22,80751	24,68955	22,53865	22,27286	25,17319
	1,11874151673848	-2,06388155619304	O00193;E9PM92;E9PRZ9;E9PQA1	O00193;E9PM92;E9PRZ9	Small acidic protein	SMAP;C11orf58	30.1	30.6	30.1	34.4	21.3	36.6	91;174	88;175;176	Color [Gray]	9	4					22	62	8	8	8	366	366	366	20332	0	16385	113650000	122	18942233,3333333	3,77647686004639	23,39323	23,74119	23,30828	25,30215	21,18882	25,03863	24,8362	22,91916
	0,695308020418544	1,5251350402832	Q5SRT3;Q53FB0;O00299	Q5SRT3;Q53FB0;O00299	Chloride intracellular channel protein;Chloride intracellular channel protein 1	CLIC1	48.1	18.7	60.6	8.7	21.2	27.4		32	Color [Gray]	9	4					9	30	12	12	12	643	643	643	26922	0	64691	42114000	44	7018866,66666667	0,42917937040329	23,56337	20,86098	23,65207	20,53279	21,89086	23,13712	22,00727	23,22762
	0,187657729506018	1,01900736490886	O14530;B7Z7A4;O14530-2;F8WCJ3;B8ZZX4;F8WBV5;G3XAJ4	O14530;B7Z7A4;O14530-2	Thioredoxin domain-containing protein 9	TXNDC9	39.8	18.1	11.1	11.1	0	0	23	1;39;192	Color [Gray]	9	4						14	10	10	10	593	593	593	26534	0	21476	5328700	17	888113,333333333	0,253293931484222	21,89115	19,6192	18,46659	18,05123	15,97367	15,60395	18,45354	20,43466
	0,781020754311779	-2,2548885345459	O14776-2;O14776;G3V220;B7Z921	O14776-2;O14776;G3V220	Transcription elongation regulator 1	TCERG1	0	3.2	3.2	4	0	1.9			Color [Gray]	9	4					9		5	5	5	59	59	59	12169	0	13495	4613000	11	768835	2,51092934608459	16,18131	19,60908	20,32542	20,58573	16,74362	19,82022	20,06868	18,74046
	0,585489338734907	-2,248322168986	O15020-2;O15020;A4QPE4	O15020-2;O15020	Spectrin beta chain, non-erythrocytic 2	SPTBN2	0	0	0	1.4	0	2.2			Color [Gray]	9	4					4		4	4	4	36	36	36	26831	0	23634	2802200	4	467033,333333333	∞	16,93226	15,33649	16,41332	20,01127	15,99234	20,73513	19,83317	15,4461
	0,536945518849723	-1,27579243977864	O60869;O60869-2;O60869-3	O60869;O60869-2;O60869-3	Endothelial differentiation-related factor 1	EDF1	0	10.1	10.1	23.6	10.1	10.1			Color [Gray]	9	4						7	3	3	3	236	236	236	16368	0	5569	4237600	10	706278,333333333	2,23244452476501	16,70792	18,59036	19,62067	20,47289	18,94547	20,03819	19,89588	18,73725
	0,428989769150098	-1,91108926137288	O75391;I3L0X5;I3L4C3;I3L0Q5	O75391;I3L0X5;I3L4C3	Sperm-associated antigen 7	SPAG7	36.6	32.6	22	26	0	5.7		12;182	Color [Gray]	9	4						19	7	7	7	414	414	414	26034	0	49095	14191000	24	2365203,33333333	1,78537750244141	21,90353	21,92872	20,16042	21,99296	15,95184	19,82737	21,53189	20,69566
	1,06181102950796	-3,73285230000814	O75533;Q7Z497;H7C341;A0JLT9;Q32Q20;A0PJH5;A8K355;B4DGZ4;O75533-2	O75533	Splicing factor 3B subunit 1	SF3B1	0	7.8	3.4	8.1	0	0		609;613;620	Color [Gray]	9	4					15	1	11	11	11	135	135	135	14583	0	28214	4705700	14	784271,666666667	16,8088417053223	14,97222	20,4027	18,01143	21,54284	14,9546	17,19128	20,49762	16,42647
	2,2931232841148	-3,33952713012695	O75607	O75607	Nucleoplasmin-3	NPM3	0	9	0	9	0	9			Color [Gray]	9	4						3	1	1	1	9	9	9	19343	0	85431	2053600	3	342266,666666667	∞	15,67751	19,5771	16,83859	19,77348	15,33332	18,51742	19,38476	14,49312
	0,0340618433670301	0,147304534912109	O75663;O75663-2	O75663;O75663-2	TIP41-like protein	TIPRL	23.5	13.2	6.6	6.6	0	0		42;48;49;175;225	Color [Gray]	9	4						7	4	4	4	276	276	276	31444	0	7474	3160000	8	526681,666666667	0,566805481910706	20,36602	19,00662	19,34408	19,23372	16,07128	17,09912	18,53967	19,35875
	0,96897245611792	-3,30022112528483	O75717;A8KAE0;Q05DR3;O75717-2;C9JYB3;B3KMC2;B3KMD2;B3KMD9	O75717;A8KAE0;Q05DR3;O75717-2	WD repeat and HMG-box DNA-binding protein 1	WDHD1	0	9.3	0	9.1	0	0		124	Color [Gray]	9	4					12		11	11	11	161	161	161	12597	0	573	4850900	15	808483,333333333	∞	16,52426	20,75955	16,26424	21,55248	16,05936	16,43649	20,62486	13,7378
	0,234779271818078	-1,39164511362712	O75937;S4R3J5	O75937	DnaJ homolog subfamily C member 8	DNAJC8	9.9	36.4	0	22.9	6.3	0		21	Color [Gray]	9	4					1	13	9	9	9	502	502	502	29841	0	16747	7353800	15	1225623,33333333	2,01885104179382	20,99762	21,05815	15,2313	21,38279	18,38465	16,34757	20,64462	19,63108
	1,0973731186314	-2,62735176086426	O75940	O75940	Survival of motor neuron-related-splicing factor 30	SMNDC1	0	5	0	4.2	0	0			Color [Gray]	9	4						2	2	2	2	92	92	92	26711	0	36251	974860	2	162476,666666667	∞	14,74524	18,36884	15,44327	19,27946	15,1751	15,59737	18,30987	14,67879
	0,141651678349374	-0,904857317606609	O95372;Q5QPQ1;Q5QPQ0;Q5QPQ3;Q5QPQ2;Q5QPN5;Q5QPN9	O95372;Q5QPQ1;Q5QPQ0;Q5QPQ3;Q5QPQ2	Acyl-protein thioesterase 2	LYPLA2	22.5	48.9	18.2	18.2	3.5	0		107;178	Color [Gray]	9	4						16	7	7	7	489	489	489	24737	0	26219	17326000	18	2887633,33333333	1,25822770595551	22,18323	22,71867	21,47259	21,39158	15,98163	18,24178	21,61766	21,28626
	1,175113856236	-1,76887289683024	O95373;B3KQG6	O95373;B3KQG6	Importin-7	IPO7	0	0	0	1.2	0	1.3			Color [Gray]	9	4					2		2	2	2	24	24	24	11952	0	34453	578190	1	96366,6666666667	∞	15,27336	17,07032	15,54158	18,53973	17,07722	17,58871	17,55625	14,35721
	1,51488957328028	2,9850476582845	O95433-2;O95433;H0YJG7;H0YJ63;G3V3W9;G3V438;H0YJU2	O95433-2;O95433;H0YJG7	Activator of 90 kDa heat shock protein ATPase homolog 1	AHSA1	39.6	11.1	46.9	11.1	11.8	0		252	Color [Gray]	9	4					6	21	9	9	9	483	483	483	32339	0	36298	19439000	33	3239848,33333333	0,136735707521439	22,17035	19,20751	23,14169	20,72476	21,57612	18,00076	19,57206	22,4426
	0,842902612937559	-3,57463582356771	V9HWB9;P00338;P00338-4;B4DJI1;P00338-3;P00338-5;P00338-2;F5GXH2;F5GYU2;F5GXY2;F5H5J4;F5H6W8;F5GZQ4;F5H8H6;F5GXC7;F5GWW2;F5GXU1;F5H5G7;F5H155;A8MW50;A0A087WUM2;Q96L19;G3XAP5;F5H245;G9BCY8;G9BCY7;D6NKH9;Q5U077;Q6ZMR3;P07864;P07195	V9HWB9;P00338;P00338-4;B4DJI1;P00338-3;P00338-5;P00338-2;F5GXH2;F5GYU2;F5GXY2;F5H5J4;F5H6W8	L-lactate dehydrogenase;L-lactate dehydrogenase A chain	HEL-S-133P;LDHA	6.3	9.3	6	5.7	5.7	39.5		62;63	Color [Gray]	9	4					15	10	12	12	12	395	395	395	36688	0	23329	64440000	27	10740035	56,7064437866211	19,18369	19,26756	18,9915	21,59623	17,7916	25,82692	24,33128	18,50583
	0,314216412593405	-2,39231872558594	V9HWN7;P04075;J3KPS3;H3BQN4;P04075-2;A0A0M4FNU3;H3BUH7;H3BR04;H3BPS8;H3BMQ8;H3BR68;H3BU78;A4UCS9;A4UCT0;B7Z1Z9;B7Z3K7	V9HWN7;P04075;J3KPS3;H3BQN4;P04075-2;A0A0M4FNU3;H3BUH7;H3BR04;H3BPS8	Fructose-bisphosphate aldolase;Fructose-bisphosphate aldolase A	HEL-S-87p;ALDOA	3	3	0	3	0	57.1		165;251	Color [Gray]	9	4					19	2	17	17	16	571	571	495	3942	0	42842	83838000	22	13972998,3333333	352,76171875	17,85447	16,91998	16,82841	17,33257	18,7076	26,31487	24,73205	16,2695
	0,11526481188275	-0,449501037597656	Q5TZZ9;P04083;B5BU38;Q5T3N1;Q5T3N0;B4DL19;Q05BR2	Q5TZZ9;P04083;B5BU38;Q5T3N1	Annexin;Annexin A1	ANXA1	48.3	40.8	43.9	13.3	31.2	42.2	29	3;318	Color [Gray]	9	4					32	47	18	18	18	592	592	592	38714	0	2485	124190000	84	20699000	2,60858082771301	23,80292	22,78838	23,88409	22,06303	22,03567	26,21978	24,83489	23,45163
	0,209653636148143	1,28942171732585	V9HW43;P04792;B4DL87;F8WE04;C9J3N8	V9HW43;P04792;B4DL87	Heat shock protein beta-1	HEL-S-102;HSPB1	66.8	12.7	73.2	4.9	13.2	68.3		169	Color [Gray]	9	4					14	22	13	13	13	868	868	868	22782	0	11492	81170000	41	13528333,3333333	2,35912919044495	23,44481	19,37405	23,36025	18,74232	20,91561	25,73603	24,17965	22,94139
	0,397966902755405	-2,62057495117188	P05165-2;P05165;B2RDE0;P05165-3;H0Y5U0;Q5JTW6;Q16380;Q5JVH2;H0Y4B9;H0Y798	P05165-2;P05165;B2RDE0;P05165-3	Propionyl-CoA carboxylase alpha chain, mitochondrial	PCCA	1.4	55.3	55.4	55.4	33.9	32.6		79;98;102;290;324;347;422;440;523;599	Color [Gray]	9	4					179	18	44	44	44	623	623	623	77047	0	29028	449620000	243	74937048,3333333	1,2102358341217	18,27544	25,47985	27,46824	27,3345	24,05507	24,84613	26,29026	26,01497
	0,15471010034112	-0,616558710734051	R4GN98;P06703;B2R577	R4GN98;P06703;B2R577	Protein S100;Protein S100-A6	S100A6	0	20	20	37.6	17.6	17.6	47		Color [Gray]	9	4						8	2	2	2	376	376	376	9681	0	32437	4722800	8	787143,333333333	1,10224425792694	16,43111	17,79284	18,73589	20,53583	20,78756	19,47556	19,65478	19,51434
	0,163666169342101	-0,763086954752605	V9HWA3;P07451;B4DUJ3;A0A024R825;B4DUJ8	V9HWA3;P07451;B4DUJ3;A0A024R825	Carbonic anhydrase 3	HEL-S-167mP;CA3	8.1	11.5	0	3.5	0	0			Color [Gray]	9	4						5	3	3	3	162	162	162	29557	0	43445	1739200	6	289873,333333333	1,19595468044281	19,59518	19,38655	15,77056	17,99833	15,3132	15,58333	18,26838	18,01021
	0,344992431737162	-0,724572499593098	P07737;K7EJ44;I3L3D5;CON__P02584	P07737;K7EJ44	Profilin-1	PFN1	70.7	57.1	45.7	58.6	32.9	66.4	54	12;86;114	Color [Gray]	9	4					7	37	11	11	11	886	886	886	15054	0	12941	61749000	47	10291483,3333333	1,87964951992035	23,34516	22,17408	21,65058	23,20695	22,83752	24,62595	23,67952	22,76905
	0,456531977121671	-1,04102389017741	V9HWE1;Q53HU8;P08670;B0YJC4;B0YJC5;B3KRK8;Q5JVS8	V9HWE1;Q53HU8;P08670;B0YJC4;B0YJC5;B3KRK8	Vimentin	HEL113;VIM	0	0	1.5	3.4	3.2	3.6	439		Color [Gray]	9	4					1	1	4	2	2	88	56	56	53651	32223	19318	1135100	2	189191,666666667	∞	16,31974	16,72165	17,17964	19,78894	17,69489	17,80675	18,52949	15,3552
	0,959947947081927	-2,94962374369303	P09661;H0YKK0;Q6NVW9;Q53G61;Q53G21;H0YMA0;Q9UEN1;O95485;H0YLR3	P09661;H0YKK0;Q6NVW9;Q53G61;Q53G21	U2 small nuclear ribonucleoprotein A	SNRPA1	0	26.3	0	3.5	0	0			Color [Gray]	9	4						6	5	5	5	263	263	263	28415	0	1238	2298100	7	383026,666666667	∞	15,56107	20,81472	15,58386	18,79157	15,47256	15,86007	19,54708	14,58081
	0,676907030669575	-3,01143455505371	V9HW22;P11142;Q53HF2;B3KTV0;E9PKE3;Q53GZ6;P11142-2;Q96IS6;E9PN89;E9PNE6;B4E1Q1;A8K7Q2;A0A024R6B5;P54652;E9PLF4;B4DTX2;E9PQQ4;E9PQK7;E9PK54;B3KUS2;E9PI65;E9PN25;E9PPY6;E9PS65;Q96BE0;A4D111	V9HW22;P11142;Q53HF2;B3KTV0;E9PKE3;Q53GZ6;P11142-2;Q96IS6;E9PN89;E9PNE6;B4E1Q1;A8K7Q2;A0A024R6B5;P54652	Heat shock cognate 71 kDa protein;Heat shock-related 70 kDa protein 2	HEL-S-72p;HSPA8;HSPA2	0	3.7	5.1	9.4	2	25.1		61	Color [Gray]	9	4					23		16	14	11	283	249	204	70897	0	65179	25510000	25	4251670	27,1583080291748	16,36176	18,60628	19,78907	20,05059	17,93432	24,46258	22,96743	18,20411
	1,02466569723122	4,25326983133952	Q1WWM3;P11171-2;P11171;Q4VB86;P11171-3;Q59F12;P11171-4;Q4VB87;P11171-5;P11171-6;Q29RX4;P11171-7;B7Z5L2;B7Z627;Q96HL7;B2RB02;B3KY28;A8K968;A0A0A0MRA8;Q9Y2J2-3;Q9Y2J2-2;Q9Y2J2-4;Q9Y2J2	Q1WWM3;P11171-2;P11171;Q4VB86;P11171-3;Q59F12;P11171-4;Q4VB87;P11171-5;P11171-6;Q29RX4;P11171-7	Protein 4.1	EPB41	4.6	5.5	35.6	6.7	13.7	0		288;306	Color [Gray]	9	4					37	3	22	22	20	383	383	352	83212	0	1094	45232000	52	7538591,66666667	0,0370312705636024	19,79579	18,42878	25,10286	20,26762	22,66973	16,11217	19,03829	23,7934
	0,0245054962998165	-0,18659782409668	P12883;A5YM51;Q59EV3;Q5GJ54;P13533;Q14905;Q2XUS2;Q9UKX3;B4DRV3;Q9UKX2-2;L0L5E6;L0L1K4;B4DFX9;Q9H6N6;A6N930;A8CLN2;Q1ED46;A0A087X0T3	P12883;A5YM51;Q59EV3;Q5GJ54;P13533	Myosin-7;Myosin-6	MYH7;MYH6	25.5	22.2	1.8	7.8	0	0		1067	Color [Gray]	9	4					16	75	45	45	37	301	301	255	22309	0	32331	30467000	101	5077856,66666667	0,921909034252167	23,86797	23,26914	19,04937	22,10329	18,82956	16,93427	22,21594	22,33325
	0,240048710224528	-1,81895891825358	P13639;Q8TA90;B4DPU3;Q6W6M8;B4DRE8;Q6PK56;B4DMC6	P13639;Q8TA90;B4DPU3	Elongation factor 2	EEF2	0	0	0	2.9	2.9	20.4			Color [Gray]	9	4					17		13	13	13	204	204	204	95337	0	17235	20128000	18	3354750	25,317268371582	16,79128	14,79622	15,49866	18,31301	19,5448	24,18238	22,62189	17,95984
	0,0290614192486302	-0,269220352172852	V9HWB8;P14618;H3BTN5;A0A024R5Z9;P14618-2;B4DRT3;B4DNK4;P14618-3;A0A024R609;H3BQ34;Q8WUW7;Q504U3;H3BR70;H3BT25;H3BUW1;H3BTJ2;H3BU13;H3BN34;Q9UKK4;Q9UK31;H3BQZ3;B4DPM0;Q16716;Q16715;P30613-2;P30613	V9HWB8;P14618;H3BTN5;A0A024R5Z9;P14618-2;B4DRT3;B4DNK4;P14618-3;A0A024R609;H3BQ34;Q8WUW7;Q504U3;H3BR70	Pyruvate kinase;Pyruvate kinase PKM	HEL-S-30;PKM;PKM2	2.1	2.4	30.3	17.5	38.6	32		64;149;239;291;330;334	Color [Gray]	9	4					52	2	19	19	19	461	461	461	57936	0	20273	81942000	57	13656898,3333333	1,81363153457642	17,05325	18,06218	23,73603	21,8341	23,8399	25,54056	24,06957	23,21069
	0,367872060710194	-3,57568264007568	P15924;P15924-3;Q4LE79;P15924-2;B4E2A0;B4DKX6;B4DWT7;Q6ZP16;G1UI31	P15924;P15924-3;Q4LE79;P15924-2	Desmoplakin	DSP;DSP variant protein	0	0.7	1.2	0.3	0	34.6		149;202;204;284;783;924;984;1203;1719;2047;2354;2684;2819	Color [Gray]	9	4					98	3	81	81	81	346	346	346	33177	0	32331	311750000	111	51959470	521,722351074219	14,99555	16,61554	19,18595	16,56044	16,48005	28,21262	26,62812	17,60098
	0,75732734856557	1,39033063252767	P16949;B5BU83;A2A2D0;Q96CE4;P16949-2;Q59G27;B7Z4K3	P16949;B5BU83;A2A2D0;Q96CE4;P16949-2;Q59G27	Stathmin	STMN1	30.2	15.4	29.5	30.2	33.6	38.3			Color [Gray]	9	4					2	28	10	10	8	51	51	443	17302	0	33885	35521000	31	5920016,66666667	0,403579264879227	23,71785	20,39634	22,90336	22,58713	21,80526	21,27202	21,69898	23,00806
	0,25253727967955	-0,931390762329102	P18615;P18615-3;H9ZYJ1;A0A0A0MSN9;B7Z6T4;P18615-4;A0A0A0MT02;A0A0G2JI50;E9PD43;A2ABK4;B4DZZ3	P18615;P18615-3;H9ZYJ1;A0A0A0MSN9;B7Z6T4;P18615-4;A0A0A0MT02	Negative elongation factor E	NELFE;NELF-E;RDBP	48.2	42.1	8.2	32.4	30.5	23.4		56;271;291;305;335	Color [Gray]	9	4					32	31	13	13	13	482	482	482	43239	0	14495	43244000	78	7207406,66666667	1,01752138137817	23,45676	22,63165	18,94003	22,98257	23,16707	22,7438	22,79352	22,76847
	0,191093302291953	0,549097696940105	Q6FHU2;Q53G35;P18669;Q0D2Q6;Q6P6D7;Q6FHK8;B4DKL5;B4DMJ7;B7Z9E5;B4DJA4;Q8N0Y7;P15259;A4D2J6;B7ZW15	Q6FHU2;Q53G35;P18669;Q0D2Q6;Q6P6D7;Q6FHK8;B4DKL5	Phosphoglycerate mutase;Phosphoglycerate mutase 1	PGAM1	56.7	28.3	56.7	15.7	18.1	31.9		77;126;206;230;243	Color [Gray]	9	4					9	31	14	14	14	795	795	795	28804	0	41331	36422000	45	6070433,33333333	1,12079882621765	22,85125	21,08278	22,55721	20,50067	21,71213	23,88985	22,61329	22,44876
	0,184765012557964	0,904711405436199	P21333-2;P21333;Q5HY54;Q8TES4;Q6NXF2;Q96C61;B4E2F9;B4DTD5;F8WE98;H0Y5C6;Q2VP91;Q86TQ3;H0Y5F3;H7C2E7;H7C5L4	P21333-2;P21333;Q5HY54;Q8TES4	Filamin-A	FLNA;FLJ00119	19.3	58.6	67	61.4	66.5	50.8	916;1590	28;102;297;450;660;746;849;1316;1462;1834;2166;2199;2466;2482;2581	Color [Gray]	9	4					850	105	176	176	3	707	707	14	28001	0	32331	6076400000	1231	1012734846,66667	0,241010680794716	25,71133	27,60017	31,31899	28,88536	31,01005	28,84071	28,55126	30,60409
	0,0783497400145408	0,542657852172852	Q6FHN3;Q32Q12;P22392;P22392-2;J3KPD9;E7ERL0;O60361;F6XY72;C9K028;E5RHP0	Q6FHN3;Q32Q12;P22392;P22392-2;J3KPD9;E7ERL0;O60361	Nucleoside diphosphate kinase;Nucleoside diphosphate kinase B;Putative nucleoside diphosphate kinase	NME2;NME1-NME2;NME1;NME2P1	30.3	25	39.5	25.7	0	0		90	Color [Gray]	9	4						17	8	8	4	559	559	257	17298	0	10563	11966000	17	1994350	0,559202551841736	21,08388	20,95731	22,3783	21,10508	16,3854	16,15722	20,44812	21,28668
	0,593538228791347	-2,16133944193522	Q9BSV4;Q86VG2;P23246;Q6PIX2;P23246-2;H0Y9K7	Q9BSV4;Q86VG2;P23246;Q6PIX2;P23246-2	Splicing factor, proline- and glutamine-rich	SFPQ	0	6.3	5.8	14.8	6.3	4.1			Color [Gray]	9	4					17		7	6	6	148	136	136	6863	0	12608	10121000	19	1686865	3,68335103988647	16,03044	19,07559	20,14383	22,1835	19,93531	21,33451	21,33939	19,45837
	0,320997005115878	-1,42260996500651	V9HWI5;P23528;G3V1A4;E9PP50;E9PK25;B4E112;E9PQB7;E9PLJ3;E9PS23;Q549N0;Q9Y281-3;Q9Y281	V9HWI5;P23528;G3V1A4;E9PP50;E9PK25;B4E112;E9PQB7	Cofilin-1	HEL-S-15;CFL1	32.5	15.7	7.2	7.2	7.2	51.2			Color [Gray]	9	4					5	8	5	5	5	512	512	512	18502	0	34825	27674000	14	4612218,33333333	6,74542236328125	21,26574	19,35232	19,2853	19,69224	18,65449	24,4288	22,93759	20,18369
	0,383820332016791	0,703201929728191	Q6FI51;Q6FHS4;P25685;P25685-2;M0R080;M0QYT3;M0QXK0;M0R1D6;M0QZD0;B4DKK9;M0R128	Q6FI51;Q6FHS4;P25685;P25685-2;M0R080	DnaJ homolog subfamily B member 1	DNAJB1	26.8	15.9	32.6	29.4	20.9	19.4			Color [Gray]	9	4					12	40	15	15	14	406	406	406	3801	0	36708	32134000	52	5355616,66666667	0,646531045436859	23,43949	21,03711	22,03698	22,91497	21,87147	21,28625	22,00398	22,63319
	0,156145701160856	1,15941301981608	V9HWC0;P26038;Q6PJT4;Q6PKD3;Q05CU6;B0YJ88;P35241;P35241-5;Q9UJZ6;Q9UK20;B7Z4C7;B7Z2S7;P35241-4;V9GZ54;Q9UJU1;Q9UJZ2;Q9UJZ8;Q9UJZ7;P35241-3;E9PNP4;E9PQ82;E9PNV3	V9HWC0;P26038;Q6PJT4	Moesin	HEL70;MSN	0	1.7	21.3	0	11.6	14		12;200;305;433;451	Color [Gray]	9	4					22		13	13	8	279	279	18	67819	0	23566	19290000	22	3214946,66666667	1,05603075027466	16,55154	17,51561	22,27287	16,65872	22,04073	23,21257	21,65515	21,5765
	0,335824696597402	2,04442818959554	Q5M7Z9;Q53GX7;P26639;B2RDX5;P26639-2;B4DKZ9;B3KTN2;D6R9F8;D6RCA5;D6RDJ6	Q5M7Z9;Q53GX7;P26639;B2RDX5;P26639-2;B4DKZ9;B3KTN2	Threonine--tRNA ligase, cytoplasmic	TARS	0	0	21	4.8	16.6	2.1		291;647	Color [Gray]	9	4					23		12	12	12	246	246	246	78605	0	36444	14338000	26	2389595	0,14840205013752	16,24879	15,7045	22,90889	20,25223	22,13621	19,20388	19,23629	21,98871
	0,554784535591595	-1,47739473978679	P27694;I3L4R8;I3L524;I3L2M5	P27694;I3L4R8	Replication protein A 70 kDa DNA-binding subunit;Replication protein A 70 kDa DNA-binding subunit, N-terminally processed	RPA1	0	1.8	0	10.9	0	0			Color [Gray]	9	4					5		5	5	5	127	127	127	68137	0	11891	1203700	6	200626,666666667	∞	16,98843	17,06445	15,59479	20,02472	16,50782	16,43405	18,61415	16,77596
	1,72139861613127	-3,85022354125977	P29083;Q53F88;C9IYL4;C9J329;Q05DN6;E9PER7	P29083;Q53F88;C9IYL4	General transcription factor IIE subunit 1	GTF2E1	0	10	3.4	17.8	0	0		429	Color [Gray]	9	4					9		6	6	6	214	214	214	49452	0	89764	5373600	13	895608,333333333	17,8251876831055	15,94998	20,74386	18,12288	21,66804	16,00437	19,21599	20,69376	16,53792
	1,05978459242535	-2,16840998331706	P29084;E5RH41;E5RIW4	P29084;E5RH41	Transcription initiation factor IIE subunit beta	GTF2E2	18.6	41.2	37.5	43.6	12	34.7	291	120;245	Color [Gray]	9	4					18	55	17	17	17	491	491	491	33043	0	14511	109460000	85	18243716,6666667	3,91870331764221	23,12373	24,88925	23,42137	25,35817	20,84269	23,64559	24,793	22,82262
	0,455773359312813	-3,06030432383219	V9HWD9;Q53EM5;P29401;P29401-2;B4E022;B3KSI4;A0A0B4J1R6;A0A0K0K1H9;B3KPZ8;B4DVU1;E9PFF2;A0A0S2Z5C0;F8W888;A0A0S2Z4T2;Q6MZE3;F8WAX4	V9HWD9;Q53EM5;P29401;P29401-2;B4E022;B3KSI4;A0A0B4J1R6;A0A0K0K1H9;B3KPZ8;B4DVU1;E9PFF2	Transketolase	HEL107;TKT	0	34.3	26.8	39.8	24.9	28.1		1;199;266;303;604	Color [Gray]	9	4					69	1	24	24	24	522	522	522	67877	0	10775	93931000	89	15655183,3333333	2,19617462158203	15,43473	22,25191	24,36926	25,05424	22,87972	24,55848	24,35878	23,22379
	0,392099395182535	-3,69753615061442	P29508;P29508-2;Q9BYH9	P29508;P29508-2	Serpin B3	SERPINB3	8.7	0	0	3.6	0	53.8		1;12;243	Color [Gray]	9	4					36	4	24	24	0	564	564	0	44564	0	32331	239560000	41	39925821,6666667	453,736022949219	19,0069	15,46915	14,18315	18,56618	17,58294	27,83026	26,24764	17,42193
	0,436718732629152	-1,13742129007975	V9HWC7;P30041;B4DUK1;A4UCS6	V9HWC7;P30041	Peroxiredoxin-6	HEL-S-128m;PRDX6	40.2	39.7	13.4	8.9	5.4	25.9			Color [Gray]	9	4					4	22	10	10	10	545	545	545	25035	0	51786	17127000	32	2854543,33333333	1,46955597400665	22,40221	21,79388	19,49379	20,58518	19,31935	22,24855	21,69596	21,14058
	0,423858355788011	-1,43634510040283	V9HWD6;P31946;B5BU24;P31946-2;Q4VY20;Q4VY19;A0A0J9YWE8;A0A0J9YWZ2;B4DY04;Q53S41;Q9H4N8;Q59EQ2;B4DMT8;B2R6N6;A0A024R1K7;Q04917	V9HWD6;P31946;B5BU24;P31946-2	14-3-3 protein beta/alpha;14-3-3 protein beta/alpha, N-terminally processed	HEL-S-1;YWHAB	0	10.2	0	0	0	21.5		3;220	Color [Gray]	9	4					3	2	5	4	4	26	22	22	28082	0	80037	1487600	5	247931,666666667	∞	16,64144	17,47191	15,34603	15,73657	17,22848	20,3165	18,91958	14,22443
	1,21743979509006	1,98313585917155	P32320;Q71UE9	P32320;Q71UE9	Cytidine deaminase	CDA	56.8	26	55.5	54.8	39.7	28.1	11	91	Color [Gray]	9	4					2	31	6	6	5	575	575	425	16185	0	73499	49325000	44	8220750	0,277611702680588	23,85605	20,44627	24,02301	22,5963	22,60418	21,49126	21,76853	23,61739
	0,727378791900348	-2,47225157419841	P35251-2;P35251;H0Y8U4;Q14756	P35251-2;P35251	Replication factor C subunit 1	RFC1	0	4.6	0	4.8	0	0			Color [Gray]	9	4					8		5	5	5	58	58	58	12818	0	12148	2426000	11	404320	∞	15,75423	19,90569	15,62862	20,46134	17,45759	15,89017	19,62514	15,1445
	0,674668312365468	-1,64603996276855	P35908;CON__Q6NXH9	P35908	Keratin, type II cytoskeletal 2 epidermal	KRT2	67.6	76.8	75.6	75.4	55.1	75.7		216;257;294;337;467;491	Color [Gray]	9	4					175	174	64	61	1	947	922	47	65432	0	32331	1258000000	409	209671005,333333	4,43461322784424	25,23528	26,30473	26,97596	27,10939	25,83812	29,57337	28,35018	26,20137
	0,1811515581222	-0,864748636881512	P37108;H0YLW0;H0YLA2	P37108;H0YLW0;H0YLA2	Signal recognition particle 14 kDa protein	SRP14	0	0	0	21.3	0	10.3			Color [Gray]	9	4						2	2	2	2	316	316	316	1457	0	15529	1078600	2	179763,333333333	∞	17,13861	13,79467	15,36481	19,57023	16,46251	18,19528	18,45574	13,24732
	0,0495381932360318	0,0717919667561837	P37802;X6RJP6;P37802-2;B7Z5A2;C9J5W6;Q9UI15	P37802;X6RJP6;P37802-2	Transgelin-2	TAGLN2	90.5	90.5	65.3	85.9	70.9	76.4	17;171	85;90;122;130;178;189;194	Color [Gray]	9	4					37	186	24	24	24	905	905	905	22391	0	32331	838380000	291	139729833,333333	1,03351843357086	27,17826	26,01263	26,70108	27,53066	27,17293	27,2936	27,08165	27,03409
	0,0435599589677227	0,200043996175129	P38606-2;P38606;B7Z2V6;C9JA17;C9JVW8	P38606-2;P38606	V-type proton ATPase catalytic subunit A	ATP6V1A	0	8.2	31.8	21.7	12.7	11.3		285;335	Color [Gray]	9	4					32	1	16	16	16	397	397	397	64735	0	83929	16579000	39	2763210	0,488237202167511	18,05932	19,46714	23,03658	21,37454	21,27424	20,92832	20,78996	21,82431
	1,34778478799412	-2,67088826497396	Q6FHX6;P39748;B4DWZ4;P39748-2;I3L3E9;F5H1Y3	Q6FHX6;P39748;B4DWZ4;P39748-2;I3L3E9	Flap endonuclease 1	FEN1	5.5	18.2	2.9	21.1	2.9	7.1		37;180;191	Color [Gray]	9	4					6	13	8	8	8	255	255	255	42592	0	27245	10507000	25	1751123,33333333	5,65135097503662	17,44847	21,40026	18,45595	22,21804	19,98982	20,28861	21,5048	19,0062
	1,59548255051588	-3,32846864064535	Q5QTS3;Q53H34;P40429;M0QZU1;A0A096LPE0;Q8J015;B4DNC8;Q9BSQ6;M0QYS1;Q6NVV1	Q5QTS3;Q53H34;P40429;M0QZU1;A0A096LPE0;Q8J015;B4DNC8;Q9BSQ6;M0QYS1;Q6NVV1	60S ribosomal protein L13a;Putative 60S ribosomal protein L13a protein RPL13AP3	RPL13A;RPL13a;RPL13AP3	0	5.4	0	5.4	0	10.8			Color [Gray]	9	4					2	3	2	2	2	108	108	108	23662	0	76382	4173300	5	695556,666666667	∞	17,25587	18,8368	15,58223	19,4845	17,00059	21,50281	20,40781	13,64323
	0,165604445500576	0,684001286824547	P41236;E7EMN6;Q6NXS2;E7EUI7;G1AUC5;Q6NXS1	P41236;E7EMN6;Q6NXS2;E7EUI7;G1AUC5;Q6NXS1	Protein phosphatase inhibitor 2;Protein phosphatase inhibitor 2-like protein 3	PPP1R2;PPP1R2P3	18	17.6	28.3	17.1	7.3	7.3		25;50;66	Color [Gray]	9	4					3	17	6	6	6	327	327	327	23015	0	59565	5361800	25	893631,666666667	0,487110018730164	19,86854	18,13416	21,27122	20,29086	16,84058	17,50331	19,15913	20,19681
	0,578097386110555	-1,79128328959147	P42166	P42166	Lamina-associated polypeptide 2, isoform alpha;Thymopoietin;Thymopentin	TMPO	7.8	13.5	0	13	5.9	10.8			Color [Gray]	9	4					18	5	11	11	4	241	241	84	75491	0	24276	11526000	28	1920966,66666667	2,07838988304138	20,42655	20,79598	16,78983	21,16674	21,15487	21,78237	21,30669	20,25122
	0,178611090766096	-0,58680025736491	P46109	P46109	Crk-like protein	CRKL	31.7	30.7	5.9	18.2	19.1	23.4		16;110	Color [Gray]	9	4					4	26	10	10	10	455	455	455	33777	0	30476	15892000	30	2648641,66666667	0,930766582489014	22,15385	21,51489	18,22435	21,39116	21,63569	20,86823	21,28414	21,38765
	0,553642098174508	-1,45963478088379	Q59GE4;P46783;F6U211;S4R435;Q9NQ39	Q59GE4;P46783;F6U211;S4R435;Q9NQ39	40S ribosomal protein S10;Putative 40S ribosomal protein S10-like	RPS10;RPS10-NUDT3;RPS10P5	5.2	13.2	13.2	13.2	0	5.2			Color [Gray]	9	4					1	7	2	2	2	132	132	132	1986	0	50086	3302600	8	550440	2,65947556495667	18,47382	18,10615	19,0384	19,25693	15,9803	20,50833	19,60973	18,19859
	0,63606704075332	-1,91279284159343	Q5T626;Q53H03;P49321-2;P49321;P49321-3;Q9P1N1;Q5T624;B4DS57;P49321-4;H0YDS9;E9PRH9;H0YF33;O95138;E9PI86;E9PPQ8;Q6PJY7;E9PPR5	Q5T626;Q53H03;P49321-2;P49321;P49321-3;Q9P1N1;Q5T624;B4DS57;P49321-4;H0YDS9;E9PRH9;H0YF33;O95138	Nuclear autoantigenic sperm protein	NASP	0	19.2	10.7	31	5.6	15.8		56;354	Color [Gray]	9	4					20		8	8	8	332	332	332	48804	0	37073	9821600	25	1636933,33333333	2,77478003501892	16,75559	19,94006	20,86015	22,09036	19,4139	20,7376	21,19855	19,72617
	0,335059398040805	0,637484232584637	P50402;Q5HY57;F8WEQ1	P50402;Q5HY57	Emerin	EMD	35	23.2	35.4	26	9.8	13.8	88	1;73	Color [Gray]	9	4					4	28	9	9	9	524	524	524	28994	0	57135	18233000	39	3038850	0,553882360458374	21,84564	20,57487	22,67588	21,64663	20,27014	20,6577	21,04687	21,89922
	0,336081168294047	-1,34501075744629	P50990-2;P50990;Q7Z759;Q53HU0;P50990-3;H7C4C8;H7C2U0	P50990-2;P50990;Q7Z759;Q53HU0;P50990-3;H7C4C8	T-complex protein 1 subunit theta	CCT8	2.8	18	25.1	36.5	20	11		230;281;292;366;473	Color [Gray]	9	4					47	6	19	19	19	425	425	425	57645	0	63645	48872000	59	8145326,66666667	1,44236946105957	18,56108	22,19529	22,69526	24,05887	23,61324	22,65045	23,1977	22,66926
	0,0534584647358308	0,301938056945801	Q96CV8;P52888;K7EP46;B4DU96;Q9BW75;K7EKB6;K7EIK4;K7EMU4;K7EL32;K7EL02;P52888-2	Q96CV8;P52888;K7EP46;B4DU96;Q9BW75	Thimet oligopeptidase	THOP1	0	0	9.1	5.4	2.8	2.8		341	Color [Gray]	9	4					10		5	5	5	91	91	91	78823	0	17624	3183200	13	530535	0,640584647655487	15,5153	15,40115	20,51075	19,31836	18,76762	19,16835	18,66034	19,30288
	0,119211061146669	-0,533379872639976	P60866;P60866-2;E5RIP1;E5RJX2;G3XAN0	P60866;P60866-2;E5RIP1;E5RJX2	40S ribosomal protein S20	RPS20	25.2	25.2	25.2	19.3	0	19.3	4		Color [Gray]	9	4					2	11	3	3	3	252	252	252	13373	0	10517	8802500	16	1467088,33333333	0,960561692714691	20,32421	18,69074	21,59923	20,30841	16,7807	21,30513	20,45521	20,51326
	1,03103914063157	-3,67446041107178	V9HWJ8;P61289;P61289-2;K7ESG5;Q6FHK7;A0A024R203;P61289-3;J7FRP4;A0A087WTV2;B3KQ25;K9J957;K7ENH2;K7EPX6;K7EKR3;K7EMD0;B7Z8D3;Q6MZZ1;K7EJF8	V9HWJ8;P61289;P61289-2;K7ESG5;Q6FHK7;A0A024R203;P61289-3;J7FRP4;A0A087WTV2;B3KQ25;K9J957;K7ENH2	Proteasome activator complex subunit 3	HEL-S-283;PSME3	0	37.4	5.5	19.3	0	4.3		138	Color [Gray]	9	4						15	7	7	7	374	374	374	29506	0	9144	10781000	16	1796836,66666667	51,8559112548828	15,86426	22,69141	17,638	21,78229	17,53625	17,5882	21,74947	16,05304
	1,38087254195426	-1,48820304870605	V9HW04;P62140;Q9UPN1;B7ZB67;B4DJ75;F8VYE8;A0A024RBP2;F8W0W8;B3KXM2;P62136-3;P36873;P62136;P36873-2;P62136-2;C9J9S3;C9JP48;E9PMD7;C4TNW6;B4DNE3;E7ETD8;B4E163;F8VR82;H0Y3Y6;A0A087WYY5	V9HW04;P62140;Q9UPN1;B7ZB67;B4DJ75;F8VYE8;A0A024RBP2;F8W0W8;B3KXM2;P62136-3;P36873;P62136;P36873-2;P62136-2;C9J9S3;C9JP48;E9PMD7	Serine/threonine-protein phosphatase;Serine/threonine-protein phosphatase PP1-beta catalytic subunit;Serine/threonine-protein phosphatase PP1-alpha catalytic subunit;Serine/threonine-protein phosphatase PP1-gamma catalytic subunit	HEL-S-80p;PPP1CB;PPP1CC;PPP1CA	3.4	11.9	7.3	10.4	0	3.4		29	Color [Gray]	9	4					1	9	6	6	6	177	177	177	37186	0	1607	2717300	11	452875	3,31830453872681	17,87009	18,96733	18,57189	19,91118	17,14103	19,16911	19,40874	17,67829
	0,926094383219662	-2,95331764221192	P62263;H0YB22;E5RH77	P62263;H0YB22;E5RH77	40S ribosomal protein S14	RPS14	0	7.3	0	0	0	15.9			Color [Gray]	9	4					2	1	2	2	2	159	159	159	16273	0	31102	2744400	3	457401,666666667	∞	14,54089	17,0869	15,75224	17,39957	16,64635	21,31296	19,8031	14,62358
	0,47600311031995	-1,96777820587158	P62424;Q5T8U3;Q9BY74;Q5T8U2	P62424;Q5T8U3;Q9BY74;Q5T8U2	60S ribosomal protein L7a	RPL7A;RP-L7a	0	10.2	0	0	0	12.8			Color [Gray]	9	4					3	2	4	4	4	188	188	188	29995	0	187	3837600	5	639600	∞	16,53507	18,64843	15,89429	15,82548	17,8496	21,70839	20,28681	16,26048
	1,47690157975796	-3,04077974955241	P62851	P62851	40S ribosomal protein S25	RPS25	7.2	7.2	7.2	7.2	0	15.2			Color [Gray]	9	4					2	5	2	2	2	152	152	152	13742	0	48982	4474900	7	745826,666666667	18,5532646179199	16,82551	18,29975	16,78238	19,5886	16,73815	21,58003	20,43274	16,21914
	0,0174296687369353	-0,050849278767906	P63241;I3L397;I3L504;P63241-2;Q6IS14;F8WCJ1;C9J7B5;C9J4W5;Q9GZV4	P63241;I3L397;I3L504;P63241-2;Q6IS14	Eukaryotic translation initiation factor 5A-1;Eukaryotic translation initiation factor 5A;Eukaryotic translation initiation factor 5A-1-like	EIF5A;EIF5AL1	83.1	79.9	78.6	56.5	15.6	44.2		20;79;141	Color [Gray]	9	4					4	57	14	14	14	831	831	831	16832	0	98056	53464000	76	8910666,66666667	0,819140732288361	24,01793	22,16073	23,28503	23,4837	21,05702	22,8681	22,93603	23,22384
	0,413698919966606	-2,11776415506998	P63261;B4E3A4;B4DVQ0;I3L3I0;I3L1U9;I3L4N8;K7EM38;I3L3R2;J3KT65;C9JUM1	P63261;B4E3A4;B4DVQ0;I3L3I0;I3L1U9;I3L4N8;K7EM38;I3L3R2;J3KT65	Actin, cytoplasmic 2;Actin, cytoplasmic 2, N-terminally processed	ACTG1	21.6	15.7	11.5	8.8	9.9	58.9		16;44;47;153;190;227;305;325	Color [Gray]	9	4					34	23	18	18	1	595	595	45	41792	0	29247	387130000	61	64521166,6666667	23,3300132751465	23,11793	22,28729	21,12704	21,98711	22,10732	28,43118	26,88272	22,3386
	0,977514316191558	2,39554659525554	Q6IPT9;Q6IPS9;Q6IPN6;Q53HR5;Q53HQ7;Q53HM9;Q5VTE0;P68104;Q53GA1;A0A087WVQ9;A8K9C4;Q53GE9;Q53G85;P68104-2;Q96RE1;A0A087WV01;Q9H2I7;B4DNE0;B4DV42;Q9NZS6;Q53G89;Q8IUB0;Q53HR1;Q05639;A9X7H1;Q504Z0;B4E2C5;Q16577;Q5JR01;Q96CD8;Q6P4C9;A6PW80;Q96C29;Q8TBL1;Q6P082;Q59GP5;Q6NSH7;Q6NS35;Q14222;Q2F837;Q96EB3	Q6IPT9;Q6IPS9;Q6IPN6;Q53HR5;Q53HQ7;Q53HM9;Q5VTE0;P68104;Q53GA1;A0A087WVQ9;A8K9C4;Q53GE9;Q53G85;P68104-2;Q96RE1;A0A087WV01;Q9H2I7;B4DNE0;B4DV42;Q9NZS6;Q53G89;Q8IUB0;Q53HR1;Q05639;A9X7H1;Q504Z0	Elongation factor 1-alpha;Putative elongation factor 1-alpha-like 3;Elongation factor 1-alpha 1;Elongation factor 1-alpha 2	EEF1A1;EEF1A1P5;EEF1A1L14;EEF1A2	51.1	26.2	45.2	21	37.9	37.7		49;102;201;208;276;404;410	Color [Gray]	9	4					67	63	18	18	18	55	55	55	50184	0	15398	561070000	167	93511766,6666667	0,307728856801987	26,37156	22,78029	27,41595	24,51443	27,28162	26,58778	25,39131	27,09158
	0,385145725181985	-2,25853029886882	P68133;B7Z6P1;A8K3K1;P68032;B3KUD3;D2JYH4;P62736;P63267;Q7Z7J6;A6NL76;B3KW67;Q13707;B4DUI8;P63267-2;C9JFL5;F6UVQ4;F6QUT6;B7Z6I1;F8WB63;B8ZZJ2;B3KPP5;F8WCH0;K4EQ44;K4EP00;K4ENJ5;Q562S2;Q562Y4;Q562X7;Q562X6;Q562X4;Q562X2;Q562X1;Q562X0;Q562W2;Q562U1;Q562U0;Q562T8;Q562T6;Q562T5;Q562T4;Q562T3;Q562T0;Q562R6;Q562R5;Q562R0;Q562Q9;Q562Q8;Q562Q6;Q562Q4;Q562Q2;Q562Q0;Q562P8;Q562L3	P68133;B7Z6P1;A8K3K1;P68032;B3KUD3;D2JYH4;P62736;P63267;Q7Z7J6;A6NL76;B3KW67;Q13707;B4DUI8;P63267-2	Actin, alpha skeletal muscle;Actin, alpha cardiac muscle 1;Actin, aortic smooth muscle;Actin, gamma-enteric smooth muscle	ACTA1;ACTC1;ACTA2;ACTG2	40.3	46.2	22	17	9.8	35.8		46;49;84;192;301;307;327	Color [Gray]	9	4					5	17	18	8	8	589	35	35	42051	0	25078	28661000	24	4776798,33333333	1,74279057979584	23,08813	22,97605	20,54745	19,8429	15,51254	23,10476	22,53337	21,73197
	0,589736557978813	-3,75197919209798	P68431;B4E380;Q71DI3;Q16695;K7EMV3;B4DEB1;K7ES00;Q6NXT2;Q6TXQ4;K7EP01;Q5TEC6	P68431;B4E380;Q71DI3;Q16695;K7EMV3;B4DEB1;K7ES00;Q6NXT2	Histone H3.1;Histone H3;Histone H3.2;Histone H3.1t;Histone H3.3C	HIST1H3A;HIST2H3A;HIST3H3;H3F3B;H3F3A;H3F3C	0	5.1	0	0	0	52.2		91;121	Color [Gray]	9	4					6	1	5	5	1	522	522	235	15404	0	68619	45639000	9	7606581	∞	15,5549	16,52781	17,38099	17,84247	15,61925	25,44079	23,85882	14,86997
	0,0386041857422797	0,0944474538167341	P81605;P81605-2	P81605;P81605-2	Dermcidin;Survival-promoting peptide;DCD-1	DCD	12.7	22.7	22.7	22.7	22.7	10			Color [Gray]	9	4					4	11	3	3	3	227	227	227	11284	0	99884	5951300	16	991886,666666667	0,983720421791077	19,43882	18,91348	20,77225	20,85946	18,92726	19,08205	19,90793	19,93161
	1,67964411128281	-3,42393493652344	P82979;Q567R9;F8VZQ9;H0YHG0;A4D286;F8VS12	P82979;Q567R9;F8VZQ9;H0YHG0;A4D286	SAP domain-containing ribonucleoprotein	SARNP;CIP29;LOC402290	0	22.9	0	13.8	0	0			Color [Gray]	9	4						7	5	5	5	271	271	271	23671	0	10267	3254600	7	542433,333333333	∞	16,40738	20,77153	15,51473	20,48207	17,57452	18,51483	20,04909	13,34266
	0,375239272968557	0,499450047810871	V9HW01;P83731;C9JXB8;C9JNW5	V9HW01;P83731;C9JXB8;C9JNW5	60S ribosomal protein L24	HEL-S-310;RPL24	29.3	29.3	33.8	19.1	19.1	19.1	147	1;91	Color [Gray]	9	4					4	29	7	7	7	363	363	363	17779	0	31053	34887000	34	5814466,66666667	0,685800552368164	22,88521	21,93406	23,18054	22,7342	21,71423	21,61338	22,17364	22,71778
	0,69678821657031	-2,96768379211426	Q02413;Q02413-2	Q02413	Desmoglein-1	DSG1	2.9	4.9	3.1	5	0	23.6		133;208;221;249;398;425;880;883	Color [Gray]	9	4					23	6	15	15	15	236	236	236	11375	0	11154	35467000	32	5911148,33333333	39,1191024780273	18,29302	19,23264	19,10242	19,48113	17,40148	24,9862	23,45859	18,16879
	0,921913206445438	-1,59701156616211	Q03111	Q03111	Protein ENL	MLLT1	0	3.8	0	2.3	0	2.3		1	Color [Gray]	9	4					4		4	4	4	84	84	84	62055	0	61552	1074900	4	179145	∞	17,00477	19,3465	15,48272	17,53685	17,33939	17,73456	18,45077	15,52801
	0,0299776726880303	0,238305409749351	Q06124;Q06124-2;Q06124-3;B3GUD5;H0YF12;B3GUD4;B3GUD3;A0A0U1RRI0;Q16344	Q06124;Q06124-2;Q06124-3;B3GUD5	Tyrosine-protein phosphatase non-receptor type 11	PTPN11	0	3.9	18.1	16.6	9.4	2.5		202;508	Color [Gray]	9	4					27		14	14	14	258	258	258	68436	0	47824	12391000	29	2065125	0,401684403419495	14,77649	17,48793	22,54597	21,42624	21,37316	19,06652	20,17477	21,49064
	1,16139347630846	1,42597071329752	Q06830;A0A0A0MSI0;B2R4P2;A0A0A0MRQ5;H7C3T4;V9HW63;Q13162	Q06830;A0A0A0MSI0;B2R4P2	Peroxiredoxin-1	PRDX1	68.8	51.3	67.8	44.2	31.2	31.2		21;100	Color [Gray]	9	4					21	80	20	20	19	688	688	633	2211	0	13644	231000000	121	38500416,6666667	0,402880430221558	25,82406	23,20903	26,01525	24,7292	25,15796	24,78112	24,3984	25,70998
	0,423670315790797	-2,29759693145752	Q9HB00;Q08554-2;Q08554	Q9HB00;Q08554-2;Q08554	Desmocollin-1	DSC1	1.5	1.8	1.8	0	0	9.3			Color [Gray]	9	4					6	2	5	5	5	93	93	93	93834	0	88534	12599000	8	2099841,16666667	21,3686008453369	15,68953	17,69914	18,96127	16,82227	16,47291	23,49509	21,93587	17,51845
	0,822348636508215	4,14242871602376	Q09666;B4DTV0;Q8N274;E9PKR9;E9PLK4;E9PJZ0;E9PJC6;Q96EC4;Q09666-2;E9PQE3	Q09666	Neuroblast differentiation-associated protein AHNAK	AHNAK	17.3	18.8	80.4	12.9	71.7	27.5	203;243;751;753;756;2568;2575;2578	77;248;309;493;502;571;628;631;633;650;690;699;749;808;811;820;840;859;887;936;939;948;955;966;989;1008;1067;1081;1096;1136;1197;1224;1236;1254;1264;1325;1352;1392;1418;1441;1444;1465;1520;1532;1569;1572;1581;1620;1671;1783;1912;1915;2107;2110;2186;2213;2253;2314;2357;2388;2455;2487;2569;2572;2581;2648;2776;2837;2894;2904;2965;3032;3109;3120;3150;3160;3233;3283;3286;3290;3295;3405;3417;3474;3510;…	Color [Gray]	9	4					1234	75	428	428	283	832	832	55	62909	0	32331	8075400000	1599	1345894666,66667	0,0246620792895555	25,31721	24,83422	32,47569	24,21845	30,79784	27,11078	25,94921	31,29077
	0,468473967448311	1,57137616475423	Q12792;Q12792-3;F8VS81;Q12792-4;F8VRG3;F8W1Q9	Q12792;Q12792-3;F8VS81;Q12792-4	Twinfilin-1	TWF1	18	8.9	10.9	5.1	0	0			Color [Gray]	9	4					3	12	6	6	6	20	20	20	40282	0	83616	6376800	19	1062791,66666667	0,331374228000641	21,08958	19,81898	21,28664	19,33695	18,06691	16,57307	19,01304	20,60651
	0,343291437974766	1,28199736277262	Q6FI03;Q5U0Q1;Q13283;Q6ZP53;Q53HH4;Q32P45;E5RIZ6;B7Z8K4;E5RH00;D6R9X5;D6R9A4;D6RBM9;D6REX8;D6RBR0;E5RI46;E5RIF8;D6RE13;D6RBW8;E5RH42;D6RAC7;E5RJU8;D6RB17;A8K6V7;A0A024RDB2;A0A024RDE5;Q13283-2;Q9UN86-2;Q9UN86	Q6FI03;Q5U0Q1;Q13283;Q6ZP53;Q53HH4;Q32P45;E5RIZ6;B7Z8K4	Ras GTPase-activating protein-binding protein 1	G3BP;DKFZp686L1159;G3BP1	0	0	2.4	2.6	7.9	3.6			Color [Gray]	9	4					6		4	4	3	105	105	79	52164	0	58045	1890900	6	315150	0,44590750336647	16,8605	14,56088	17,62156	17,59943	20,07705	18,55281	17,56852	18,7337
	1,23340707394414	-4,13926378885905	Q13428;Q13428-3;Q13428-4;Q13428-2;Q13428-8;J3KQ96;E7ETY2;Q13428-6;Q13428-7;Q13428-5;Q59FZ2;B4DRA2;B4DLB1;H0YA99	Q13428;Q13428-3;Q13428-4;Q13428-2;Q13428-8;J3KQ96;E7ETY2;Q13428-6;Q13428-7;Q13428-5;Q59FZ2	Treacle protein	TCOF1	0	16.2	7.4	8.9	0.9	11		121;512;514;1024	Color [Gray]	9	4					52		25	25	25	209	209	209	1521	0	15215	47686000	56	7947793,33333333	7,82588005065918	17,33739	22,8511	22,25765	23,12024	18,56815	24,60964	23,74864	20,78038
	1,00844260356164	2,13936233520508	Q13442;F8WBW6	Q13442	28 kDa heat- and acid-stable phosphoprotein	PDAP1	41.4	15.5	23.2	13.3	23.2	13.3	95;132	127	Color [Gray]	9	4					8	32	15	15	15	602	602	602	2063	0	32331	63709000	44	10618083,3333333	0,159698486328125	25,20955	21,56839	23,53338	21,85852	21,92955	20,82749	21,47969	24,12627
	0,0927236915300611	0,704615910847981	Q14157-4;Q14157-1;B4DYY5;F8W726;Q14157-3;Q14157;Q14157-5;B4DZJ6;Q5VU77;Q5VU79;Q5VU78;Q5VU81;Q5VU80;H0Y5H6;H7C2T8	Q14157-4;Q14157-1;B4DYY5;F8W726;Q14157-3;Q14157;Q14157-5;B4DZJ6	Ubiquitin-associated protein 2-like	UBAP2L	0	7.3	29.8	7.4	25.3	4.9		41;98;288;459	Color [Gray]	9	4					49		19	19	19	341	341	341	10317	0	10601	49737000	55	8289600	0,134370297193527	16,22213	20,44577	24,87961	20,98015	23,62956	21,19153	20,90527	23,80098
	0,615729218412488	1,8917662302653	Q53HG7;Q14247;A0A024R5M3;Q14247-3;Q14247-2;Q76MU0;B3KRK4;B4E358;H0YCD9;H0YEV2;A0A0B6XJY7	Q53HG7;Q14247;A0A024R5M3;Q14247-3;Q14247-2;Q76MU0	Src substrate cortactin	CTTN;EMS1	38	41.1	58.2	50.2	66.7	43.6	124;144;171;272;336	95;129;317;448	Color [Gray]	9	4					181	42	55	55	55	691	691	691	61557	0	32331	683260000	253	113877502,666667	0,16564704477787	24,19144	23,90251	27,40973	25,29274	28,53412	25,26474	24,94796	27,54178
	0,391855368484668	-2,44095325469971	Q14814-4;Q4LE66;Q14814;Q14814-6;Q14814-5;Q5IRN4;Q14814-3;Q14814-2;Q05BX2;Q5IRN2;H0YM62;D6RG14;D6RB91;D6RG21;D6RCM6;D6RJA7;A0A0D9SET2;D6R942;D6RC63;D8L7E9;D6RJG6;A0A0D9SFD0;A0A0R4J2G5;A0A024RAL6;A0A0D9SGI5;B2R681;A0A024RAL7;A8K720;A0A0S2Z417;A0A0S2Z454;A0A0S2Z4N0;A0A0S2Z453;Q06413-4;Q06413-3;Q06413-6;Q06413-2;Q06413;Q06413-5;Q02078-4;Q02078-6;Q02078-3;Q02078-5;Q02078-2;Q02078;H0YKY6	Q14814-4;Q4LE66;Q14814;Q14814-6;Q14814-5;Q5IRN4;Q14814-3;Q14814-2;Q05BX2	Myocyte-specific enhancer factor 2D	MEF2D;MEF2D variant protein;MEF2D/DAZAP1 fusion	0	8.4	20.2	24.7	13	18.3		62;282	Color [Gray]	9	4					41		11	11	11	249	249	249	55113	0	17659	53099000	47	8849733,33333333	1,70555448532104	15,64671	21,5877	23,59537	23,80725	22,72894	23,89892	23,41152	22,64128
	1,87102624133651	-3,81926536560059	Q15020;Q15020-4;F8VV04;B4DRG9;B4DYA2;B4E3R6;Q15020-2;F8W667;F8VVK9;F8VZM2;H0YHU8;Q15020-3	Q15020;Q15020-4;F8VV04;B4DRG9;B4DYA2;B4E3R6	Squamous cell carcinoma antigen recognized by T-cells 3	SART3	0	29.2	11.7	32.8	6.4	15.5		321;510;552;765	Color [Gray]	9	4					62		24	24	24	361	361	361	10993	0	17344	48502000	75	8083600	12,5570211410522	18,35539	23,3692	21,1638	24,47457	20,22823	23,36145	23,83602	20,1856
	0,0526899529541069	0,295660654703777	Q15056-2;Q15056;Q75MU1;B4DMV6;Q75MU2;Q75MT8;A4D198	Q15056-2;Q15056;Q75MU1;B4DMV6;Q75MU2	Eukaryotic translation initiation factor 4H	EIF4H;WBSCR1	50.9	32.9	3.9	18	18	7.9		175	Color [Gray]	9	4						20	9	9	9	548	548	548	252	0	27393	15646000	20	2607701,66666667	0,396304816007614	23,18551	21,21502	17,31752	20,69778	20,51884	18,22209	20,49742	21,83273
	0,154179335249474	0,759826342264812	V9HWB5;Q15181;Q5SQT6	V9HWB5;Q15181	Inorganic pyrophosphatase	HEL-S-66p;PPA1	15.6	0	17.6	7.6	0	7.6		243	Color [Gray]	9	4					1	7	5	5	5	232	232	232	3266	0	31828	3935800	11	655975	0,944272935390472	19,4185	15,19981	20,33604	18,83867	17,02377	20,46034	19,28133	19,36405
	0,489451423193688	0,828943888346352	Q53SS8;Q15365	Q53SS8;Q15365	Poly(rC)-binding protein 1	PCBP1	34.6	50	37.4	33.1	27.2	8.1		1;20;74;87;137;179;186	Color [Gray]	9	4					22	37	12	12	9	562	562	435	37497	0	28943	74051000	71	12341766,6666667	0,686264038085938	23,62232	23,65163	24,00582	23,73645	23,75491	21,50814	23,26005	23,80322
	1,02677968870488	1,28550720214844	Q15366-6;Q15366-3;Q15366;Q15366-2;F8VZX2;Q15366-7;Q15366-8;Q15366-4;Q15366-5;B4DRD7;B4DLC0;H3BRU6;F8W0G4;F8VXH9;F8W1G6;J3QT27;Q5MJP6;E9PFP8;P57721-2;P57721-3;P57721-5;P57721-4;P57721;H3BSS4;F8VTZ0;F8VRH0;H3BSP4;H3BND9	Q15366-6;Q15366-3;Q15366;Q15366-2;F8VZX2;Q15366-7;Q15366-8;Q15366-4;Q15366-5;B4DRD7;B4DLC0;H3BRU6;F8W0G4;F8VXH9	Poly(rC)-binding protein 2	PCBP2	22.7	27.1	31.3	15.2	16.1	3.9		20;137	Color [Gray]	9	4					8	10	9	6	6	396	271	271	3815	0	24022	17891000	21	2981870	0,480179041624069	21,67185	21,75601	22,01516	20,33101	22,10393	19,84739	20,88366	21,94201
	0,799480554720346	3,87400182088216	Q15942;H0Y2Y8;Q96AF9;Q28617;B4DQR8;Q9BUS0;Q15942-2;B4DY85;C9IZ41;C9JJK5;H7C3D3;H7C3R3	Q15942;H0Y2Y8;Q96AF9;Q28617;B4DQR8;Q9BUS0;Q15942-2;B4DY85	Zyxin	ZYX	4.4	4.4	36.2	2.1	29	4.4		158;512	Color [Gray]	9	4					28	4	16	16	16	414	414	414	61277	0	12168	51267000	41	8544506,66666667	0,0253953505307436	18,02832	18,22176	24,87131	17,72767	24,18246	19,51065	18,69109	23,99039
	1,42063723095813	-5,83300495147705	Q16777;Q6FI13;A3KPC7;A0A024RAS2;B2R5B3;A4FTV9;A0A0U1RR32;A0A0U1RRH7;Q99878;Q96KK5;Q9BTM1;P20671;P0C0S8;H0YFX9;B4E0B3;B2R5B6;Q9BTM1-2	Q16777;Q6FI13;A3KPC7;A0A024RAS2;B2R5B3;A4FTV9;A0A0U1RR32;A0A0U1RRH7;Q99878;Q96KK5;Q9BTM1;P20671;P0C0S8;H0YFX9;B4E0B3;B2R5B6;Q9BTM1-2	Histone H2A type 2-C;Histone H2A type 2-A;Histone H2A;Histone H2A type 1-J;Histone H2A type 1-H;Histone H2A.J;Histone H2A type 1-D;Histone H2A type 1	HIST2H2AC;HIST2H2AA3;HIST1H2AH;H2AFJ;HIST1H2AK;HIST1H2AJ;HIST1H2AD;HIST1H2AG	7	44.2	0	21.7	0	35.7		52	Color [Gray]	9	4					7	10	5	5	3	581	581	364	13988	0	71391	88967000	17	14827865	410,142791748047	17,72327	20,32773	17,64626	21,91079	15,6851	26,31513	24,81829	16,13831
	1,07667644309012	-2,13581848144531	Q2L6I0;Q96QC0;Q58F28	Q2L6I0;Q96QC0	Serine/threonine-protein phosphatase 1 regulatory subunit 10	PPP1R10	0	3.7	0	2.9	0	0			Color [Gray]	9	4					5		4	4	4	55	55	55	99057	0	16179	1578400	5	263053,333333333	∞	15,78397	18,84482	17,71601	20,07887	16,52069	17,50443	19,005	16,14872
	0,882785436313373	-2,56200281778971	Q2NL82;I3L1Q5	Q2NL82	Pre-rRNA-processing protein TSR1 homolog	TSR1	0	3.6	0	4	0	0		483	Color [Gray]	9	4					5		4	4	4	46	46	46	91809	0	13471	1151200	5	191873,333333333	∞	14,93036	18,33882	14,67545	19,64474	15,976	15,28427	18,5498	15,14884
	0,0851494638047468	0,537738800048828	Q59HE3;B7Z4U9;B2RCJ7;A8K8C4;Q15786	Q59HE3;B7Z4U9;B2RCJ7;A8K8C4;Q15786			0	4.5	32.9	5.4	19.3	3.2		195;362;488;531	Color [Gray]	9	4					5		22	1	1	374	17	17	84227	0	45315	16296000	5	2715916,66666667	0,261642456054688	16,15565	18,85166	23,2397	19,36226	21,52196	21,09016	20,10337	22,0377
	0,435006226723205	1,72187296549479	Q5T6F2;B4DZ54;B4DH66;B7Z7P2;F5H2U4;B4DRB6;A2A305;B4E0R5;Q9P0H6;Q6UWR4;A0A0D9SFI5;B3KQ73;Q5T6F2-2;Q59EA0;Q5JV08;H0YDN2	Q5T6F2;B4DZ54;B4DH66;B7Z7P2;F5H2U4;B4DRB6	Ubiquitin-associated protein 2	UBAP2	1.4	5.5	19.7	3	10.8	1.7		39;191;643	Color [Gray]	9	4					30	1	15	15	15	231	231	231	11711	0	84842	19209000	37	3201456,66666667	0,144787922501564	17,95901	19,9502	23,1335	19,7465	22,80392	19,03411	19,62723	22,41522
	1,34689424189637	-3,23280398050944	Q5T8P6-2;Q5T8P6-3;Q5T8P6;A0A087X0H9;Q5T8P6-5;Q5T8P6-4;B4DZH7;E2PSN0;Q5T8P6-6	Q5T8P6-2;Q5T8P6-3;Q5T8P6;A0A087X0H9;Q5T8P6-5;Q5T8P6-4	RNA-binding protein 26	RBM26	0	11.5	0	8	0	1.4		620	Color [Gray]	9	4					14		9	9	8	143	143	131	11102	0	17498	5272700	14	878796,666666667	∞	16,84981	20,77612	16,48929	21,6167	17,35109	17,99579	20,74517	14,50211
	0,240190100859123	1,25587145487467	Q60FE6;Q60FE5;A6NDY9;A0A087WWY3	Q60FE6;Q60FE5;A6NDY9;A0A087WWY3		FLNA	19.4	59.1	66.9	61.2	66.4	51.3	889;1563	75;270;423;633;719;822;1289;1435;1807;2139;2172;2439;2455;2554	Color [Gray]	9	4					11	2	175	2	2	706	6	6	2775	0	30001	34804000	17	5800663,33333333	0,233166977763176	18,19099	18,81199	23,8588	21,7078	23,59958	21,36196	21,06485	23,16542
	0,524991788679607	2,15080070495605	Q6FI81;Q6FI81-3;H3BV90;H3BUG4;B4DHB9;H3BT65;H3BQ23;H3BPG7;Q6FI81-2;H3BTZ8	Q6FI81;Q6FI81-3;H3BV90;H3BUG4;B4DHB9;H3BT65;H3BQ23	Anamorsin	CIAPIN1	61.2	40.7	35.3	37.2	20.2	3.8		205;210	Color [Gray]	9	4					17	48	15	15	15	683	683	683	33582	0	1537	70182000	75	11697030	0,449934184551239	24,44821	22,98064	24,165	23,65403	22,67653	18,20266	22,79144	23,94365
	0,737087288493163	-2,73670514424642	Q6IN85;A0A024R6M2;Q6IN85-2;G3V5Z3;Q6IN85-4;H0YIY8;Q6IN85-5;G3V5A2;H0YJN6;G3V4R3;G3V231;B4DKA9;Q5MIZ7-5	Q6IN85;A0A024R6M2;Q6IN85-2;G3V5Z3;Q6IN85-4;H0YIY8;Q6IN85-5	Serine/threonine-protein phosphatase 4 regulatory subunit 3A	SMEK1;KIAA2010	0	12.7	7.2	15.2	5.2	4.8		360;372;395;401;461	Color [Gray]	9	4					31		12	12	9	192	192	154	95367	0	61665	14622000	31	2437016,66666667	3,81354308128357	15,70676	21,45292	20,47882	22,71009	20,5882	20,82089	21,88072	19,94958
	0,288533077337429	-1,36171817779541	Q6IPH7;E7EPB3;A0PJ62;B7Z6S8;A8K7N0;P50914	Q6IPH7;E7EPB3;A0PJ62;B7Z6S8;A8K7N0;P50914	60S ribosomal protein L14	RPL14	5.5	5.5	0	5.5	10.5	18.6			Color [Gray]	9	4					4	6	4	4	2	241	241	136	23787	0	42654	9466500	8	1577736,66666667	1,83808124065399	20,43227	20,66136	15,78579	18,55195	20,87313	21,96303	20,96271	20,08451
	0,8898612307959	-1,67314084370931	Q6PID6	Q6PID6	Tetratricopeptide repeat protein 33	TTC33	0	5	0	5	0	0			Color [Gray]	9	4						2	1	1	1	5	5	5	29411	0	12896	759340	1	126556,666666667	∞	16,30422	18,69938	17,51996	18,34806	15,13252	16,92868	17,94942	14,44931
	0,118837275398486	0,878763198852539	Q6PKG0;Q6PKG0-3;A0A0B4J210;E5RH50;H0YBW1;H0YC73;H0YC33;Q659C4-7;Q659C4-6;Q659C4-5;Q659C4-2;Q659C4;Q659C4-9;H0YBR8;H0YAX9;H0YBJ5;H0YAN4;H0YBM7	Q6PKG0;Q6PKG0-3;A0A0B4J210;E5RH50	La-related protein 1	LARP1	0	9	30.2	4.7	15	0.7		430;653;836;912;1065	Color [Gray]	9	4					45		29	29	29	38	38	38	12351	0	84713	32549000	53	5424843,33333333	0,177948027849197	16,01423	20,66796	23,9285	21,43268	23,47581	18,68161	20,6444	23,13487
	0,568112373108755	-2,8519401550293	Q6UWP8;K7ESC4	Q6UWP8	Suprabasin	SBSN	9.2	9.2	9.2	15.3	0	29.3			Color [Gray]	9	4					9	5	7	7	5	293	293	246	6054	0	30859	13941000	14	2323514,83333333	73,6099319458008	16,7378	16,19703	16,24308	18,28821	16,61984	23,67131	22,12841	15,92658
	0,141308958921964	0,460867563883465	Q7Z5U5;Q86WR0;Q6PK69;Q86WR0-2;G3V121;B7Z2L8;Q0VGD4	Q7Z5U5;Q86WR0;Q6PK69;Q86WR0-2	Coiled-coil domain-containing protein 25	CCDC25	40.1	23.2	22	19.8	6.8	6.8		85;104	Color [Gray]	9	4						19	7	7	7	401	401	401	20848	0	87932	8096900	22	1349480	0,528134167194366	21,58582	19,76838	20,85354	20,4715	17,96714	18,78402	19,83118	20,7522
	0,0496770255809147	-0,161517461140953	Q7Z6K5;A0A0A6YYH1;Q7Z6K5-2;H0YMP5;H0YL03;H0YL85;H0YMK0	Q7Z6K5;A0A0A6YYH1;Q7Z6K5-2	Arpin	ARPIN;C15orf38-AP3S2	58.4	40.7	39.8	39.8	45.6	43.4	101	97;200	Color [Gray]	9	4					16	72	17	17	17	619	619	619	24943	0	88746	214950000	108	35824350	0,812589466571808	26,15079	24,158	22,66299	25,5721	25,15812	24,72635	24,93698	25,23639
	0,990434895027927	-2,13760375976563	Q86T24	Q86T24	Transcriptional regulator Kaiso	ZBTB33	0	14.1	0	4.5	0	0			Color [Gray]	9	4					7		6	6	6	164	164	164	74484	0	13238	1660500	9	276761,666666667	∞	16,19998	20,27753	16,18079	18,57152	16,93433	16,87885	19,07829	14,33589
	0,38690583914821	0,682806015014648	Q86WV7;Q96MW1;Q96MW1-2;K7ER24	Q86WV7;Q96MW1;Q96MW1-2	Coiled-coil domain-containing protein 43	CCDC43	16.3	11.5	28.6	27.3	16.3	28.6			Color [Gray]	9	4					3	28	6	6	6	322	322	322	25563	0	36929	50799000	33	8466500	0,545357763767242	24,30229	21,70049	22,13709	23,01284	22,85217	22,52979	22,51067	23,38539
	1,45786350730222	-5,48383553822835	Q86XP3;A0A0A0MSJ0;Q86XP3-2;B3KX23;B3KTL4;T2DQ69;B3KV84;B3KMI4;J3QRI2;J3KTK9;J3KRE3	Q86XP3;A0A0A0MSJ0;Q86XP3-2;B3KX23;B3KTL4;T2DQ69	ATP-dependent RNA helicase DDX42	DDX42	0	22	3.2	29.1	4.2	15.2		366;412;415;671;679;692	Color [Gray]	9	4					48		27	27	27	403	403	403	10297	0	11858	41299000	57	6883000	20,5430355072021	14,66729	23,24902	19,7496	23,96429	19,9819	23,63699	23,64603	19,28546
	0,890016645684409	-2,0334997177124	Q8IYL3	Q8IYL3	UPF0688 protein C1orf174	C1orf174	0	5.8	0	5.8	0	0			Color [Gray]	9	4						2	1	1	1	58	58	58	25977	52466	17876	701650	2	116941,666666667	∞	16,46982	18,06007	14,04306	18,70846	17,10483	16,94967	17,83543	14,40635
	1,1320518505857	-2,88790194193522	Q8N6N3-3;Q8N6N3-2;Q8N6N3	Q8N6N3-3;Q8N6N3-2;Q8N6N3	UPF0690 protein C1orf52	C1orf52	14	24	14	23	0	23			Color [Gray]	9	4					3	10	3	3	3	24	24	24	11107	0	69435	10246000	13	1707658,33333333	5,45556497573853	19,4051	20,82951	19,76814	22,12285	16,20292	21,08751	21,46077	19,01304
	0,537775194095765	1,89217376708984	Q8NC51;Q8NC51-2;Q8NC51-3;Q63HR1;Q5VU21;D3DQ70;Q8NC51-4;D3DQ69	Q8NC51;Q8NC51-2;Q8NC51-3;Q63HR1;Q5VU21;D3DQ70;Q8NC51-4;D3DQ69	Plasminogen activator inhibitor 1 RNA-binding protein	SERBP1;DKFZp686P17171	40.7	5.1	30.1	29.4	40.2	30.4	122	340	Color [Gray]	9	4					52	20	22	22	22	515	515	515	44965	0	32331	123210000	78	20534633,3333333	0,206162393093109	23,41132	20,39121	22,35181	22,23228	26,35178	23,8149	22,74298	25,02113
	0,437649328914098	-1,97863038380941	Q8NI27;A0A0C4DG98;B4DKZ6;H0Y815;Q6P441;F2Z2V2	Q8NI27;A0A0C4DG98;B4DKZ6	THO complex subunit 2	THOC2	0	0.8	0	5.3	0	0			Color [Gray]	9	4					9		8	8	8	53	53	53	18277	0	10773	2755000	9	459165	∞	14,53252	18,53028	16,99046	21,18035	17,54149	15,28973	19,80865	14,68478
	0,397671288105441	-1,19223721822103	Q8TBE9	Q8TBE9	N-acylneuraminate-9-phosphatase	NANP	0	10.9	0	7.3	0	0			Color [Gray]	9	4						3	2	2	2	109	109	109	27813	0	68426	874590	5	145765	∞	16,69834	18,85444	15,37558	18,61188	17,08246	15,26679	18,15328	15,68114
	0,217863990662308	-0,474440256754555	Q8WW12;Q8WW12-2;Q8WW12-3	Q8WW12;Q8WW12-2	PEST proteolytic signal-containing nuclear protein	PCNP	53.9	41	51.7	53.9	51.1	52.8	67;70	124;132	Color [Gray]	9	4					27	58	12	12	12	567	567	567	18925	0	13599	350890000	105	58481500	1,75034487247467	24,9668	24,15128	25,69527	26,74175	25,26992	26,46228	26,1495	25,34186
	0,840929952769491	-2,2298542658488	Q92917	Q92917	G patch domain and KOW motifs-containing protein	GPKOW	0	12.4	0	11.1	8.6	4.2		171	Color [Gray]	9	4					9		8	8	8	321	321	321	52228	0	13322	3388200	10	564690	3,04249930381775	16,9519	19,75253	15,60898	20,07601	19,67682	19,09872	19,69711	18,09185
	0,211929576218786	-0,746511459350586	Q96B23-2;Q5BIX2;Q96B23	Q96B23-2;Q5BIX2;Q96B23	Uncharacterized protein C18orf25	C18orf25;ARKL1	0	0	5.6	6.4	0	3.2			Color [Gray]	9	4					4		3	3	3	12	12	12	36977	0	92919	976840	5	162806,666666667	1,96848690509796	15,43874	15,43834	18,32804	18,89083	15,62574	17,30287	17,72016	16,74307
	3,07492123841733	-2,74942779541016	Q96EV2;B4DVQ2;H0Y3K4;A0A0C4DFS3;H0Y3K3;A8MTF7;Q96EV2-2	Q96EV2;B4DVQ2;H0Y3K4	RNA-binding protein 33	RBM33	2.2	7.3	1	6.2	0	4.4		695;698	Color [Gray]	9	4					9	3	6	6	6	93	93	93	12998	0	15345	5893200	15	982210	10,3210000991821	18,29688	20,43461	17,59892	21,1784	18,06252	20,59359	20,77225	17,40474
	0,427675461999799	-0,874736150105797	Q96JM3	Q96JM3	Chromosome alignment-maintaining phosphoprotein 1	CHAMP1	0	4.1	1.2	1.5	0	0			Color [Gray]	9	4					4		4	4	4	68	68	68	89098	0	43748	694130	4	115689,5	8,90209674835205	16,8073	19,05436	16,09713	16,28079	16,64327	16,83676	17,66631	14,51216
	0,254881291722127	-1,18414243062337	R4GNG8;Q96NC0;R4GMX9	R4GNG8;Q96NC0	Zinc finger matrin-type protein 2	ZMAT2	15.5	33.3	0	14	7	9.3	63	76	Color [Gray]	9	4						12	5	5	5	403	403	403	14865	0	2296	7150400	13	1191745	2,01650309562683	20,77	20,4289	16,05294	21,60223	19,15153	17,49576	20,60362	19,59177
	0,664403487437209	-1,67862701416016	Q9BQ61;K7EN60;B2RE11;K7ELS0;K7ERU7	Q9BQ61;K7EN60;B2RE11	Uncharacterized protein C19orf43	C19orf43	6.8	8	6.8	29	0	6.8			Color [Gray]	9	4						7	4	4	4	301	301	301	18419	0	56546	4980100	7	830028,333333333	3,61425924301147	17,69077	18,36909	19,72689	21,26642	17,16985	19,98787	20,3104	18,4567
	1,40692562626814	3,12799835205078	Q9BRP8;Q9BRP8-2	Q9BRP8;Q9BRP8-2	Partner of Y14 and mago	WIBG	54.9	19.1	41.7	8.8	8.8	8.8		1	Color [Gray]	9	4					2	16	6	6	6	549	549	549	22655	0	76888	7244300	24	1207371,66666667	0,0827943682670593	22,01536	17,92439	20,95284	17,54208	18,68487	16,80259	17,49436	21,08868
	0,161792724106006	-0,99290657043457	Q9BTC0;Q9BTC0-1;Q9BTC0-2;Q9BTC0-3	Q9BTC0;Q9BTC0-1	Death-inducer obliterator 1	DIDO1	0	2	0.4	0	0	0.4			Color [Gray]	9	4					3	1	3	3	3	25	25	25	24387	0	33054	6378600	5	1063111,66666667	1,09452617168427	15,48383	18,93119	21,5382	16,55672	16,92127	21,4341	20,08354	19,95324
	0,672375104791425	-1,44367281595866	Q9BY42;B2RB99;B4DXL5;A0A0A0MQR2;B4DEJ8;A2A2L6;A2A2L5	Q9BY42;B2RB99;B4DXL5;A0A0A0MQR2;B4DEJ8;A2A2L6;A2A2L5	Protein RTF2 homolog	RTFDC1	6.2	16.3	10.1	8.5	13.4	9.5			Color [Gray]	9	4					9	6	6	6	6	248	248	248	33886	0	10609	6307700	16	1051295	2,07495093345642	17,11197	19,85259	19,52744	20,33156	20,13821	20,92448	20,43625	19,38317
	0,288461025825076	1,89665031433105	Q9BY44;F8WAE5;Q9BY44-3;Q9BY44-4;C9IZE1;H7C5Q3;Q9BY44-2;H7C5R5;F8WF18;F8WAT3	Q9BY44;F8WAE5;Q9BY44-3;Q9BY44-4;C9IZE1	Eukaryotic translation initiation factor 2A;Eukaryotic translation initiation factor 2A, N-terminally processed	EIF2A	0	9.1	34.2	11.3	15.2	0		18	Color [Gray]	9	4					26		16	16	16	409	409	409	64989	0	90813	20068000	31	3344768,33333333	0,154901623725891	16,38119	19,83231	23,56023	20,74567	22,25577	15,92927	19,77513	22,4657
	0,0697716246870225	-0,227807362874351	Q9H0C8;F8SNU7;H7C2I8;E9PC05	Q9H0C8;F8SNU7	Integrin-linked kinase-associated serine/threonine phosphatase 2C	ILKAP;ILKAP3	8.9	12	5.4	11	3.1	0		386	Color [Gray]	9	4					7	9	5	5	5	145	145	145	42906	0	11385	4660200	17	776703,333333333	1,13558983802795	19,24186	19,75621	20,35154	20,60286	17,77501	17,69275	19,65581	19,47237
	0,420993533352931	0,837754567464192	Q9H1E3;B4DTY3;Q6IA16;Q9H1E3-2;Q8WYF8	Q9H1E3;B4DTY3;Q6IA16;Q9H1E3-2	Nuclear ubiquitous casein and cyclin-dependent kinase substrate 1	NUCKS1;NUCKS	16.9	15.6	32.1	23.9	31.3	31.3	9		Color [Gray]	9	4					28	35	13	13	13	399	399	399	27296	0	95316	166590000	76	27764266,6666667	0,688464522361755	24,38916	22,63014	25,51563	24,21386	24,7755	25,32303	24,43247	24,97101
	0,148262753082803	0,369702657063801	Q9H444	Q9H444	Charged multivesicular body protein 4b	CHMP4B	15.6	10.7	10.7	0	0	6.2		35	Color [Gray]	9	4					1	8	4	4	4	156	156	156	2495	0	54128	3532600	10	588766,666666667	0,75216007232666	19,86777	18,70644	20,01482	17,90476	17,8919	20,05417	18,94731	19,3582
	0,863403080535855	-2,451203028361	Q9H5V9-2;Q9H5V9-3;Q9H5V9;D3DSW1	Q9H5V9-2;Q9H5V9-3;Q9H5V9;D3DSW1	UPF0428 protein CXorf56	CXorf56;hCG_1640171	39.9	54.9	14.5	35.8	14.5	28.3	79	28	Color [Gray]	9	4					5	38	10	10	10	549	549	549	19981	0	77636	56160000	47	9359976,66666667	2,86019277572632	23,48087	24,03246	19,02988	23,89984	21,13709	23,06914	23,72551	22,2094
	2,14775612295768	-3,19148794809977	Q9H814	Q9H814	Phosphorylated adapter RNA export protein	PHAX	0	2.8	0	2.8	0	2.8			Color [Gray]	9	4					3		1	1	1	28	28	28	44402	0	12858	1738800	3	289808,333333333	∞	15,45457	18,52413	15,29559	19,92596	16,60596	18,4805	19,14474	15,69874
	0,83266104807558	1,28429985046387	Q9H910;Q9H910-3;A6NGP5;H3BU16;H3BMV3;Q9H910-2;B4DL85;H3BMT0;H3BTV5;H3BMM8;B4E1P3;H3BS08	Q9H910;Q9H910-3;A6NGP5;H3BU16;H3BMV3;Q9H910-2;B4DL85;H3BMT0;H3BTV5	Hematological and neurological expressed 1-like protein	HN1L	57.4	23.7	43.7	23.7	37.9	45.3		1;17;43;157	Color [Gray]	9	4					6	28	9	9	9	632	632	632	20063	0	31318	47365000	40	7894166,66666667	0,463870674371719	22,95088	20,76061	23,91333	22,35035	23,01038	22,91073	22,25436	23,36257
	0,457925794477599	-1,05128542582194	Q9NVM6;S4R343;H0YLQ7;H0YK99	Q9NVM6	DnaJ homolog subfamily C member 17	DNAJC17	0	15.5	0	6.9	0	0			Color [Gray]	9	4						4	3	3	3	155	155	155	34687	0	65875	553740	4	92290	∞	15,24904	18,66557	18,13714	17,07358	16,33119	17,13208	17,49389	13,72382
	0,888314880296129	-3,64702733357747	Q9NW82;A8K564;D6RIW8;B3KTI7	Q9NW82;A8K564;D6RIW8	WD repeat-containing protein 70	WDR70	0	34.9	10.4	24.9	16.1	34.7		25;214;243;264;276;300;487;538	Color [Gray]	9	4					59		21	21	21	437	437	437	732	0	20002	81318000	66	13552983,3333333	6,41653919219971	17,05313	23,14841	21,26167	23,58818	23,01055	25,52984	24,48316	21,80136
	0,807557988919595	1,15854899088541	Q9NX08	Q9NX08	COMM domain-containing protein 8	COMMD8	24	24	10.9	6.6	6.6	6.6		91	Color [Gray]	9	4						11	3	3	3	24	24	24	2109	0	84996	4127800	11	687970	0,459578722715378	20,34592	19,29358	19,94678	18,80329	18,887	17,60719	18,72482	19,84643
	0,567815654949292	-1,80083847045898	Q9NZ63;Q6GVN4;A0A087X2F5;Q9P0Q6	Q9NZ63;Q6GVN4;A0A087X2F5;Q9P0Q6	Uncharacterized protein C9orf78	C9orf78	39.4	21.1	0	24.9	15.2	26.6		71;164;169;217	Color [Gray]	9	4					5	22	10	10	10	457	457	457	33688	0	35986	14782000	28	2463683,33333333	1,78429484367371	21,9713	21,8326	17,16562	21,54236	20,19147	21,35595	21,59043	20,75507
	0,758473714470838	-4,28931299845378	Q9NZT1;Q53H37	Q9NZT1;Q53H37	Calmodulin-like protein 5	CALML5	9.6	15.1	9.6	9.6	0	91.1		107;122	Color [Gray]	9	4					19	5	13	13	13	911	911	911	15892	0	18026	203330000	26	33887106,6666667	200,51904296875	18,97793	20,43482	18,91012	19,69079	16,9454	27,57578	26,00706	18,35946
	0,291313863956767	1,21005757649739	Q9UEE9;B2R9W9;A0A0H5AUJ9;A0A0H5APX3;Q9UEE9-2	Q9UEE9;B2R9W9;A0A0H5AUJ9;A0A0H5APX3;Q9UEE9-2	Craniofacial development protein 1	CFDP1	19.7	19.4	7	4	3.3	3.3	167	224	Color [Gray]	9	4					1	13	8	8	8	324	324	324	33592	0	15319	5555800	17	925960	1,22130882740021	20,43227	21,46508	18,99537	17,28537	19,10434	16,15136	19,95761	19,66918
	0,594318451488595	2,73225021362305	Q9UJU6;Q59FH4;H0Y5J4;B4DDU5;B4DKZ4;Q9UJU6-5;F8WBG8;B4DNX5;F8WC20;F8WBB2;F8WFE1;F2Z2V3;F8WB73;F8WCK3;F2Z3E3;H7C111	Q9UJU6;Q59FH4;H0Y5J4;B4DDU5;B4DKZ4;Q9UJU6-5	Drebrin-like protein	DBNL	22.6	7	15.3	8.6	45.8	23		53;104;129;268	Color [Gray]	9	4					36	8	16	16	1	479	479	28	48207	0	25202	49707000	46	8284656,66666667	0,120519816875458	21,31838	17,72507	20,16116	18,66303	25,27405	22,16873	20,76518	23,81784
	1,01217897661608	1,50840822855632	Q9UKK9;A6NFX8;A6NJU6;A6NCQ0;H0YEY4;C9JYY9	Q9UKK9;A6NFX8;A6NJU6;A6NCQ0	ADP-sugar pyrophosphatase	NUDT5	69.9	51.6	71.7	48.9	56.2	42.5		1;37;87	Color [Gray]	9	4					19	78	17	17	17	772	772	772	24327	0	21408	172140000	118	28689166,6666667	0,369814515113831	25,10037	23,13734	25,99561	24,74098	24,44164	23,13408	23,8849	25,32002
	2,66618335569197	-1,75597476959229	Q9Y2W1;Q7Z5U1;Q05D20;Q6P0P7;Q6PJV4	Q9Y2W1;Q7Z5U1;Q05D20;Q6P0P7;Q6PJV4	Thyroid hormone receptor-associated protein 3	THRAP3	0	2.4	0	1.4	0	0			Color [Gray]	9	4					3		2	2	2	24	24	24	10866	42463	18427	580950	4	96825	∞	16,82337	18,05001	16,44751	18,23986	15,98725	18,2362	17,56309	15,70516
	1,51315689203842	4,28555170694987	Q9Y3F4;Q9Y3F4-2;B0AZV0;H0YH33	Q9Y3F4;Q9Y3F4-2;B0AZV0	Serine-threonine kinase receptor-associated protein	STRAP	21.7	7.4	60.3	6.3	26	0		95;174	Color [Gray]	9	4					19	27	17	17	17	603	603	603	38438	0	90766	33165000	50	5527378,33333333	0,0267512276768684	20,7154	18,15655	24,67223	19,12535	21,87399	17,12306	18,13583	23,36008
	0,0963681821994273	-0,433961868286133	Q9Y4E8;Q9Y4E8-2;Q9Y4E8-3;Q2NL66;Q9Y4E8-4;B4DN46;F8VZG8;B7Z3J0;F8W0H4;H0YI31;B3KP28;B4DGK3;Q53H56;A0A024R2X6;G5E9A6;Q6P453;Q53FJ3;Q08AK7;A0A024R2T0;Q13107-2;Q13107;P51784	Q9Y4E8;Q9Y4E8-2;Q9Y4E8-3	Ubiquitin carboxyl-terminal hydrolase 15	USP15	0	0.9	1.4	5.8	2.1	0		122	Color [Gray]	9	4					8		6	6	6	8	8	8	11242	0	12039	2415200	9	402535	2,19438409805298	15,96004	17,31831	17,49592	20,51239	19,12374	16,05087	19,07703	17,94322
	0,661671415991596	1,41278648376465	Q9Y570;Q9Y570-4;Q9Y570-2;Q9Y570-3	Q9Y570;Q9Y570-4;Q9Y570-2;Q9Y570-3	Protein phosphatase methylesterase 1	PPME1	12.7	2.8	9.8	5.2	5.7	0		131;335	Color [Gray]	9	4					2	9	6	6	6	202	202	202	42315	0	1115	2921800	12	486973,333333333	0,288476705551147	20,30986	17,04847	19,50901	18,98432	17,75871	17,30643	17,73434	19,52782
	1,20660867767591	3,43430074055989	Q9Y5K6	Q9Y5K6	CD2-associated protein	CD2AP	17.1	22.5	42.7	10.5	50.5	5.2		48;627	Color [Gray]	9	4					83	10	32	32	32	535	535	535	7145	0	21249	201530000	108	33588383,3333333	0,0484732836484909	22,58763	21,97435	25,16385	21,3154	27,14414	21,30296	21,5665	25,93317
