# Supplementary material for: Glypican-1 drives unconventional secretion of fibroblast growth factor 2
Source: eLife. 2022 Mar 29;11:e75545. doi: 10.7554/eLife.75545 (PMC8986318; doi:10.7554/eLife.75545)
Supplement: Figure 2—source data 1. [file elife-75545-fig2-data1.xlsx]

## Sheet: Fig. 2A
A
Replicate 1		compared to total sample	Ratio elu/in	Normalized to average wt	Variation wt		Replicate 2		compared to total sample	Ratio elu/in	Normalized to average wt	Variation wt		Replicate 3		compared to total sample	Ratio elu/in	Normalized to average wt	Variation wt		Replicate 4		compared to total sample	Ratio elu/in	Normalized to average wt	Variation wt
Clone	Raw Signal						Clone	Raw Signal						Clone	Raw Signal						Clone	Raw Signal
wt pool (1) input	2790	167400					wt pool (1) input	3750	225000					wt pool (1) input	541	32460					wt pool (1) input	7040	422400
wt pool (1) eluate	909	2727	1.62903		84.621		wt pool (1) eluate	1350	4050	1.8		90.9224		wt pool (1) eluate	143	429	1.32163		86.0154		wt pool (1) eluate	3130	9390	2.22301		79.5194
wt pool (2) input	2080	124800		1.92509	100		wt pool (2) input	3450	207000		1.97971			wt pool (2) input	728	43680		1.5365			wt pool (2) input	6710	402600		2.79556
wt pool (2) eluate	924	2772	2.22115	100	115.379		wt pool (2) eluate	1490	4470	2.15942	100	109.078		wt pool (2) eluate	255	765	1.75137	100	113.985		wt pool (2) eluate	4520	13560	3.36811	100	120.481
GPC1 KO G4 input	3760	225600					GPC1 KO G4 input	3360	201600					GPC1 KO G4 input	993	59580					GPC1 KO G4 input	4820	289200
GPC1 KO G4 eluate	404	1212	0.537234	27.9069			GPC1 KO G4 eluate	320	960	0.47619	24.0535			GPC1 KO G4 eluate	67.7	203.1	0.340886	22.1859			GPC1 KO G4 eluate	773	2319	0.801867	28.6836
G4 + GPC1 input	3910	234600					G4 + GPC1 input	3230	193800					G4 + GPC1 input	1360	81600					G4 + GPC1 input	8030	481800
G4 + GPC1 eluate	2910	8730	3.72123	193.301			G4 + GPC1 eluate	2500	7500	3.86997	195.482			G4 + GPC1 eluate	878	2634	3.22794	210.084			G4 + GPC1 eluate	11000	33000	6.84932	245.007
G4 + GPC5 input	2350	141000					G4 + GPC5 input	3890	233400					G4 + GPC5 input	461	27660					G4 + GPC5 input	4080	244800
G4 + GPC5 eluate	716	2148	1.5234	79.1341			G4 + GPC5 eluate	1020	3060	1.31105	66.2245			G4 + GPC5 eluate	33.8	101.4	0.366594	23.8591			G4 + GPC5 eluate	898	2694	1.10049	39.3657
wt pool (1) input	2720	163200					wt pool (1) input	4680	280800					wt pool (1) input	5850	351000					wt pool (1) input	4210	252600
wt pool (1) eluate	487	1461	0.895221		69.8876		wt pool (1) eluate	1550	4650	1.65598		76.0408		wt pool (1) eluate	2270	6810	1.94017		79.1643		wt pool (1) eluate	1190	3570	1.4133		101.551
wt pool (2) input	3150	189000		1.28094	100		wt pool (2) input	4260	255600		2.17776			wt pool (2) input	4930	295800		2.45082			wt pool (2) input	4890	293400		1.39172
wt pool (2) eluate	1050	3150	1.66667	100	130.112		wt pool (2) eluate	2300	6900	2.69953	100	123.959		wt pool (2) eluate	2920	8760	2.96146	100	120.836		wt pool (2) eluate	1340	4020	1.37014	100	98.4495
dKO input	1720	103200					dKO input	3330	199800					dKO input	3180	190800					dKO input	5890	353400
dKO eluate	103	309	0.299419	23.3748			dKO eluate	402	1206	0.603604	27.7168			dKO eluate	422	1266	0.663522	27.0735			dKO eluate	428	1284	0.363328	26.1063
dKO + GPC1 input	2860	171600					dKO + GPC1 input	3790	227400					dKO + GPC1 input	4140	248400					dKO + GPC1 input	4560	273600
dKO + GPC1 eluate	965	2895	1.68706	131.705			dKO + GPC1 eluate	2260	6780	2.98153	136.908			dKO + GPC1 eluate	2080	6240	2.51208	102.5			dKO + GPC1 eluate	2080	6240	2.2807	163.876
dKO + GPC5 input	1300	78000					dKO + GPC5 input	865	51900					dKO + GPC5 input	734	44040					dKO + GPC5 input	2050	123000
dKO + GPC5 eluate	149	447	0.573077	44.7387			dKO + GPC5 eluate	68.2	204.6	0.39422	18.1021			dKO + GPC5 eluate	165	495	1.12398	45.8614			dKO + GPC5 eluate	193	579	0.470732	33.8237
wt pool (1) input	2130	127800					wt pool (1) input	4240	254400					wt pool (1) input	6900	414000					wt pool (1) input	4070	244200
wt pool (1) eluate	496	1488	1.16432		76.6953		wt pool (1) eluate	1540	4620	1.81604		83.5753		wt pool (1) eluate	2770	8310	2.00725		81.0607		wt pool (1) eluate	1070	3210	1.3145		106.104
wt pool (2) input	2420	145200		1.51811	100		wt pool (2) input	4190	251400		2.17294			wt pool (2) input	5110	306600		2.47623			wt pool (2) input	4900	294000		1.23888
wt pool (2) eluate	906	2718	1.8719	100	123.305		wt pool (2) eluate	2120	6360	2.52983	100	116.425		wt pool (2) eluate	3010	9030	2.94521	100	118.939		wt pool (2) eluate	1140	3420	1.16327	100	93.8965
GPC5 KO C5 input	5360	321600					GPC5 KO C5 input	4190	251400					GPC5 KO C5 input	8780	526800					GPC5 KO C5 input	7130	427800
GPC5 KO C5 eluate	1430	4290	1.33396	87.8695			GPC5 KO C5 eluate	2170	6510	2.5895	119.171			GPC5 KO C5 eluate	5530	16590	3.1492	127.178			GPC5 KO C5 eluate	2720	8160	1.90743	153.964
C5 + GPC1 input	4240	254400					C5 + GPC1 input	4800	288000					C5 + GPC1 input	7850	471000					C5 + GPC1 input	4150	249000
C5 + GPC1 eluate	4550	13650	5.36557	353.437			C5 + GPC1 eluate	6780	20340	7.0625	325.021			C5 + GPC1 eluate	10200	30600	6.49682	262.368			C5 + GPC1 eluate	3180	9540	3.83133	309.257
C5 + GPC5 input	2670	160200					C5 + GPC5 input	2180	130800					C5 + GPC5 input	5530	331800					C5 + GPC5 input	3830	229800
C5 + GPC5 eluate	639	1917	1.19663	78.8236			C5 + GPC5 eluate	932	2796	2.13761	98.3745			C5 + GPC5 eluate	2850	8550	2.57685	104.064			C5 + GPC5 eluate	1270	3810	1.65796	133.828
Normalization to wt	wt	GPC1 KO G4	G4 + GPC1	G4 + GPC5		Normalization to correspondingGPC1 over-expression	wt	GPC1 KO G4	G4 + GPC1		Normalization to corresponding KO	wt	GPC1 KO G4	G4 + GPC1	G4 + GPC5
Replicate 1	100	27.9069	193.301	79.1341		Replicate 1	51.7327	14.437	100		Replicate 1	358.334	100	692.664	283.564
Replicate 2	100	24.0535	195.482	66.2245		Replicate 2	51.1557	12.3048	100		Replicate 2	415.739	100	812.693	275.321
Replicate 3	100	22.1859	210.084	23.8591		Replicate 3	47.6	10.5605	100		Replicate 3	450.737	100	946.926	107.542
Replicate 4	100	28.6836	245.007	39.3657		Replicate 4	40.8152	11.7073	100		Replicate 4	348.631	100	854.171	137.241
Average		25.7075	210.968	52.1458		Average	47.8259	12.2524			Average	393.36		826.614	200.917
SD		3.1001	23.8843	25.1001		SD	5.01838	1.62635			SD	48.375		105.468	91.5427
Normalization to wt	wt	dKO	dKO + GPC1	dKO + GPC5		Normalization to correspondingGPC1 over-expression	wt	dKO	dKO + GPC1		Normalization to corresponding KO	wt	dKO	dKO + GPC1	dKO + GPC5
Replicate 1	100	23.3748	131.705	44.7387		Replicate 1	75.9274	17.7479	100		Replicate 1	427.81	100	563.446	191.397
Replicate 2	100	27.7168	136.908	18.1021		Replicate 2	73.0416	20.2448	100		Replicate 2	360.793	100	493.955	65.311
Replicate 3	100	27.0735	102.5	45.8614		Replicate 3	97.5613	26.4133	100		Replicate 3	369.365	100	378.597	169.396
Replicate 4	100	26.1063	163.876	33.8237		Replicate 4	61.0217	15.9305	100		Replicate 4	383.049	100	627.726	129.561
Average		26.0679	133.747	35.6315		Average	76.888	20.0841			Average	385.254		515.931	138.916
SD		1.91346	25.1551	12.8859		SD	15.2189	4.57509			SD	29.8146		106.613	55.3427
Normalization to wt	wt	GPC5 KO C5	C5 + GPC1	C5 + GPC5		Normalization to correspondingGPC1 over-expression	wt	GPC5 KO C5	C5 + GPC1		Normalization to corresponding KO	wt	GPC5 KO C5	C5 + GPC1	GPC5 +GPC5
Replicate 1	100	87.8695	353.437	78.8236		Replicate 1	28.2936	24.8614	100		Replicate 1	113.805	100	402.23	89.7054
Replicate 2	100	119.171	325.021	98.3745		Replicate 2	30.7672	36.6655	100		Replicate 2	83.9134	100	272.736	82.5494
Replicate 3	100	127.178	262.368	104.064		Replicate 3	38.1145	48.473	100		Replicate 3	78.6302	100	206.3	81.8256
Replicate 4	100	153.964	309.257	133.828		Replicate 4	32.3356	49.7852	100		Replicate 4	64.9501	100	200.863	86.9212
Average		122.045	312.521	103.772		Average	32.3777	39.9463			Average	85.3247		270.532	85.2504
SD		27.2116	38.1069	22.7667		SD	4.17077	11.6594			SD	20.5999		93.6815	3.72662

## Sheet: Fig. 2B
B
	WT	GPC1 KO	GPC1 KO +GPC1	GPC1 KO +GPC5	GPC5 KO	GPC5 KO +GPC1	GPC5 KO +GPC5	GPC1/5 KO	GPC1/5 KO +GPC1	GPC1/5 KO +GPC5
Exp. I	502.9	128.09	525.31	54.93	450.04	828.81	458.06	315.19	302.95	238.71
Exp. II	484.61	140.47	531.64	238.04	623.37	675.36	596.9	392.75	399.04	390.46
Exp. III	210.51	23.01	352.02	140.44	154.21	333.65	167.67	65.21	233.83	154.67
Exp. IV	713	64.03	764.71	370.02	688.09	1185.32	911.12	329.95	642	322.42
Exp. V	323.5	182.92	362.05	110.17	303.17	565.9	364.09	158.76	209.75	141.58
Norm to WT	WT	GPC1 KO	GPC1 KO +GPC1	GPC1 KO +GPC5	GPC5 KO	GPC5 KO +GPC1	GPC5 KO +GPC5	GPC1/5 KO	GPC1/5 KO +GPC1	GPC1/5 KO +GPC5
Exp. I	1	0.254703	1.04456	0.109226	0.89489	1.64806	0.910837	0.626745	0.602406	0.474667
Exp. II	1	0.289862	1.09705	0.491199	1.28633	1.39362	1.23171	0.810446	0.823425	0.80572
Exp. III	1	0.109306	1.67222	0.667142	0.732554	1.58496	0.796494	0.309772	1.11078	0.734739
Exp. IV	1	0.0898036	1.07252	0.518962	0.965063	1.66244	1.27787	0.462763	0.900421	0.452202
Exp. V	1	0.56544	1.11917	0.340556	0.937156	1.7493	1.12547	0.490757	0.648377	0.437651
Mean		0.261823	1.2011	0.425417	0.963199	1.60768	1.06848	0.540096	0.817082	0.580996
SD		0.190966	0.264828	0.211357	0.201842	0.133254	0.207704	0.188455	0.204811	0.175057
Norm to corresponding GPC1 over-expression	WT	GPC1 KO	GPC1 KO +GPC1		WT	GPC5 KO	GPC5 KO +GPC1		WT	GPC1/5 KO	GPC1/5 KO +GPC1
Exp. I	0.957339	0.243837	1		0.606774	0.542995	1		1.66001	1.0404	1
Exp. II	0.911538	0.26422	1		0.717558	0.923019	1		1.21444	0.984237	1
Exp. III	0.598006	0.0653656	1		0.630931	0.462191	1		0.900269	0.278878	1
Exp. IV	0.93238	0.0837311	1		0.601525	0.58051	1		1.11059	0.513941	1
Exp. V	0.893523	0.505234	1		0.571656	0.535731	1		1.54231	0.756901	1
Mean	0.858557	0.232478			0.625689	0.608889			1.28552	0.714872
SD	0.147584	0.17719			0.0555173	0.18076			0.312352	0.320452
Norm to corresponding KO	WT	GPC1 KO	GPC1 KO +GPC1	GPC1 KO + GPC5		WT	GPC5 KO	GPC5 KO +GPC1	GPC5 KO + GPC5		WT	GPC1/5 KO	GPC1/5 KO +GPC1	GPC1/5 KO + GPC5
Exp. I	3.92615	1	4.1011	0.428839		1.11746	1	1.84164	1.01782		1.59555	1	0.961166	0.757353
Exp. II	3.44992	1	3.78472	1.6946		0.777403	1	1.0834	0.957537		1.23389	1	1.01602	0.994169
Exp. III	9.14863	1	15.2986	6.10343		1.36509	1	2.16361	1.08728		3.22819	1	3.5858	2.37188
Exp. IV	11.1354	1	11.943	5.77885		1.0362	1	1.72262	1.32413		2.16093	1	1.94575	0.977178
Exp. V	1.76853	1	1.97928	0.602285		1.06706	1	1.86661	1.20094		2.03767	1	1.32118	0.891786
Mean	5.88573		7.42133	2.9216		1.07264		1.73558	1.11754		2.05124		1.76598	1.19847
SD	4.02896		5.83869	2.80119		0.209796		0.399102	1.11754		0.753846		1.08996	0.662614
