# Supplementary material for: Glypican-1 drives unconventional secretion of fibroblast growth factor 2
Source: eLife. 2022 Mar 29;11:e75545. doi: 10.7554/eLife.75545 (PMC8986318; doi:10.7554/eLife.75545)
Supplement: Figure 3—source data 1. [file elife-75545-fig3-data1.xlsx]

## Sheet: Sheet1
A
		WT	GPC1 KO	GPC1 KO +GPC1	GPC1 KO +GPC5	GPC5 KO	GPC5 KO +GPC1	GPC5 KO +GPC5	GPC1/5 KO	GPC1/5 KO +GPC1	GPC1/5 KO +GPC5
Exp. I		861.87	528.82	1304.75	585.73	790.48	1738.72	430.43	813.99	1249.68	1029.82
Exp. II		493.5	312.06	1130.08	281.78	651.33	1272.39	710.06	362.14	953.49	478.83
Exp. III		541.75	294.48	1094.96	253.96	649.43	1377.69	720.36	454.88	1034.93	557.1
Exp. IV		456.53	271.27	745.04	454.83	315.15	1015.37	587.77	347.95	1092.35	391.12
Exp. V		425.33	297.36	712.43	405.19	319.59	833.29	612.87	359.53	1109.67	376.22
Norm to WT
Exp. I		1	0.613573	1.51386	0.679604	0.917168	2.01738	0.499414	0.944446	1.44996	1.19487
Exp. II		1	0.63234	2.28993	0.570983	1.31982	2.5783	1.43882	0.73382	1.9321	0.970274
Exp. III		1	0.543572	2.02115	0.468777	1.19876	2.54304	1.32969	0.839649	1.91035	1.02833
Exp. IV		1	0.5942	1.63196	0.996276	0.690316	2.2241	1.28747	0.762162	2.39272	0.856724
Exp. V		1	0.699128	1.67501	0.952649	0.751393	1.95916	1.44093	0.845297	2.60896	0.884537
Mean			0.616562	1.82638	0.733658	0.975492	2.2644	1.19927	0.825075	2.05882	0.986947
SD			0.0567949	0.320623	0.232633	0.275389	0.28809	0.39698	0.082396	0.453585	0.134785
B + C
HS chains		WT	GPC1 KO	GPC1 KO +GPC1	GPC1 KO +GPC5	GPC5 KO	GPC5 KO +GPC1	GPC5 KO +GPC5	GPC1/5 KO	GPC1/5 KO +GPC1	GPC1/5 KO +GPC5
Exp. I		1	0.580379	0.86012	0.685458	0.805692	0.842458	0.73901	0.889766	0.745233	0.758276
Exp. II		1	0.680799	0.883628	0.74303	0.686297	0.5254	0.724039	0.532267	0.690655	0.679293
Exp. III		1	0.738651	1.12913	0.800701	0.560285	0.983534	0.41022	1.00377	0.827105	1.19457
Mean		1	0.66661	0.957625	0.743063	0.684091	0.783797	0.624423	0.808601	0.754331	0.877379
SD		0	0.0800845	0.14899	0.0576216	0.122718	0.234633	0.185656	0.246007	0.0686783	0.277518
GAG chains		WT	GPC1 KO	GPC1 KO +GPC1	GPC1 KO +GPC5	GPC5 KO	GPC5 KO +GPC1	GPC5 KO +GPC5	GPC1/5 KO	GPC1/5 KO +GPC1	GPC1/5 KO +GPC5
Exp. I		1	0.644228	0.634198	0.538338	0.616752	0.680669	0.852674	0.941008	0.701324	0.82352
Exp. II		1	0.634649	0.724782	0.551569	0.516337	0.73891	0.988829	0.889521	0.609469	0.928979
Exp. III		1	0.874801	1.0724	1.02399	0.958255	1.14669	0.95367	1.02165	1.03184	1.07542
Exp. IV		1	1.12228	1.04068	1.08902	1.18425	1.18905	0.904751	1.022	0.862154	1.0068
Mean		1	0.818989	0.868015	0.800729	0.8189	0.93883	0.924981	0.968546	0.801198	0.95868
SD		0	0.230667	0.221188	0.296584	0.308389	0.266102	0.0592652	0.0650156	0.185874	0.108157
