# Supplementary material for: Glypican-1 drives unconventional secretion of fibroblast growth factor 2
Source: eLife. 2022 Mar 29;11:e75545. doi: 10.7554/eLife.75545 (PMC8986318; doi:10.7554/eLife.75545)
Supplement: Figure 4—source data 1. [file elife-75545-fig4-data1.xlsx]

## Sheet: Fig. 4B
Biotinylation
	Cell line	WT		GPC1 KO		G4G		GPC1 KO +GPC3		GPC1 KO +GPC4		GPC1 KO +GPC6						WT		GPC1 KO +GPC2		GPC1 KO +GPC1TM					WT		GPC1 KO +GPC1 +SDC4		GPC1 KO +SDC4					WT		WT +SDC4
Exp. I	Raw dara	1770	968	1300	241	1340	1530	1740	614	1470	577	1990	1590					218000	77900	114000	65600	90700	24900			FGF2	28300	8640	27000	14400	31600	5720				35500	23000	47500	25800
	Elu/In	0.546893		0.185385		1.14179		0.352874		0.392517		0.798995					Elu/In	0.357339		0.575439		0.274531				IN Elu	0.3053		0.533333		0.181013				Surface/In	0.647887		0.543158
Exp. II	Raw dara	14700	4590	16400	2670	14700	8420	13600	2830	12700	3580	11400	5810					169000	94400	11600	6230	7750	5540			FGF2	7090	4490	5600	5690	7990	3560				4310	2040	7260	3480
	Elu/In	0.312245		0.162805		0.572789		0.208088		0.28189		0.509649					Elu/In	0.55858		0.537069		0.714839				IN Elu	0.633286		1.01607		0.445557				Surface/In	0.473318		0.479339
Exp. III	Raw dara	17400	7470	14000	4130	13900	11000	13900	5970	11000	6500	13800	9590					171000	101000	41500	18300	31100	19700			FGF2	22500	8050	19000	12400	37000	655				17900	6990	25300	11700
	Elu/In	0.42931		0.295		0.791367		0.429496		0.590909		0.694928					Elu/In	0.590643		0.440964		0.633441				IN Elu	0.357778		0.652632		0.0177027				Surface/In	0.390503		0.462451
Exp. IV	Raw dara	16300	4150	12800	3180	20100	10600	20000	2420	11900	3250	11700	4070					50000	29400	16500	13300	28100	16500				244	142	342	306	538	118				2660	1090	4630	2290
	Elu/In	0.254601		0.248438		0.527363		0.121		0.273109		0.347863					Elu/In	0.588		0.806061		0.587189					0.581967		0.894737		0.219331				Surface/In	0.409774		0.4946
Exp. V	Raw dara	13500	2940	13400	842	15700	11200	19700	1990	12900	2840	12800	3510					71200	25600	32100	15900	48800	30100				625	213	206	147	771	98.4				17700	11100	23000	13500
	Elu/In	0.217778		0.0628358		0.713376		0.101015		0.220155		0.274219					Elu/In	0.359551		0.495327		0.616803					0.3408		0.713592		0.127626				Surface/In	0.627119		0.586957
	Elu/In	WT	GPC1 KO	G4G	GPC1 KO +GPC3	GPC1 KO +GPC4	GPC1 KO +GPC6											WT	GPC1 KO +GPC2	GPC1 KO +GPC1TM							WT	GPC1 KO +GPC1 +SDC4	GPC1 KO +SDC4							WT	WT +SDC4
	Exp. I	0.546893	0.185385	1.14179	0.352874	0.392517	0.798995											0.357339	0.575439	0.274531							0.3053	0.533333	0.181013							0.647887	0.543158
	Exp. II	0.312245	0.162805	0.572789	0.208088	0.28189	0.509649											0.55858	0.537069	0.714839							0.633286	1.01607	0.445557							0.473318	0.479339
	Exp. III	0.42931	0.295	0.791367	0.429496	0.590909	0.694928											0.590643	0.440964	0.633441							0.357778	0.652632	0.0177027							0.390503	0.462451
	Exp. IV	0.254601	0.248438	0.527363	0.121	0.273109	0.347863											0.588	0.806061	0.587189							0.581967	0.894737	0.219331							0.409774	0.4946
	Exp. V	0.217778	0.0628358	0.713376	0.101015	0.220155	0.274219											0.359551	0.495327	0.616803							0.3408	0.713592	0.127626							0.627119	0.586957
	Norm to WT	WT	GPC1 KO	G4G	GPC1 KO +GPC3	GPC1 KO +GPC4	GPC1 KO +GPC6										Norm to WT	WT	GPC1 KO +GPC2	GPC1 KO +GPC1TM						Norm to WT	GPC1 KO +GPC1 +SDC4	GPC1 KO +SDC4							Norm to WT	WT +SDC4
	Exp. I	1	0.338978	2.08778	0.645234	0.717722	1.46097											1	1.61034	0.768265							1.74691	0.5929								0.838352
	Exp. II	1	0.521401	1.83442	0.666426	0.902784	1.63221											1	0.96149	1.27974							1.60444	0.703563								1.01272
	Exp. III	1	0.687149	1.84334	1.00043	1.37641	1.61871											1	0.746582	1.07246							1.82413	0.0494796								1.18424
	Exp. IV	1	0.975791	2.07133	0.475253	1.07269	1.36631											1	1.37085	0.99862							1.53744	0.376878								1.20701
	Exp. V	1	0.288532	3.27571	0.463845	1.01092	1.25917											1	1.37763	1.71548							2.09387	0.374491								0.935958
	Mean		0.56237	2.22252	0.650238	1.01611	1.46747												1.21338	1.16691							1.76136	0.419462								1.03566
	SD		0.279757	0.600959	0.21696	0.242346	0.160995												0.350251	0.35701							0.217646	0.250757								0.158772
	Norm to GPC1 over-expression	WT	GPC1 KO	G4G													Norm to GPC1 KO + GPC2	WT	GPC1 KO +GPC2	GPC1 KO +GPC1TM						Norm to GPC1 KO +GPC1 +SDC4	WT	GPC1 KO +GPC1 +SDC4	GPC1 KO +SDC4
	Exp. I	0.478978	0.162363	1														0.620986	1	0.477082							0.572438	1	0.339399
	Exp. II	0.545131	0.284232	1														1.04005	1	1.331							0.623269	1	0.438509
	Exp. III	0.542492	0.372773	1														1.33944	1	1.43649							0.548208	1	0.0271251
	Exp. IV	0.482782	0.471094	1														0.729474	1	0.728467							0.650434	1	0.245134
	Exp. V	0.305278	0.0880824	1														0.725885	1	1.24524							0.477584	1	0.178851
	Mean	0.470932	0.275709															0.891167		1.04366							0.574387		0.245804
	SD	0.0978171	0.154693															0.295624		0.417694							0.0675142		0.156684
	Norm to GPC1 KO	WT	GPC1 KO	G4G	GPC1 KO +GPC3	GPC1 KO +GPC4	GPC1 KO +GPC6										Norm to GPC1 KO +GPC1TM	WT	GPC1 KO +GPC2	GPC1 KO +GPC1TM						Norm to GPC1 KO +SDC4	WT	GPC1 KO +GPC1 +SDC4	GPC1 KO +SDC4
	Exp. I	2.95004	1	6.15904	1.90347	2.11731	4.30993											1.30163	2.09608	1							1.68662	2.94639	1
	Exp. II	1.91791	1	3.51826	1.27814	1.73146	3.13043											0.781407	0.751315	1							1.42134	2.28045	1
	Exp. III	1.45529	1	2.6826	1.45592	2.00308	2.35569											0.932437	0.696141	1							20.2103	36.8662	1
	Exp. IV	1.02481	1	2.12272	0.487044	1.09931	1.4002											1.00138	1.37275	1							2.65338	4.07939	1
	Exp. V	3.46582	1	11.353	1.60761	3.50366	4.36405											0.582926	0.803055	1							2.67029	5.59126	1
	Mean	2.16277		5.16712	1.34644	2.09096	3.11206											0.919957	1.14387	1							5.7284	10.3527
	SD	1.02142		3.78844	0.532376	0.882715	1.27527											0.267044	0.59787	0							8.11513	14.8745

## Sheet: Fig. 4C
Surface binding capacity
	Raw data	WT	GPC1 KO +GPC2	GPC1 KO +GPC3	GPC1 KO +GPC4	GPC1 KO +GPC6	GPC1 KO +GPC1TM		Raw data	WT	GPC1 KO G4	G41	G45		Raw data	WT	WT +SDC4	GPC1 KO +GPC1 +SDC4	GPC1 KO +SDC4
	Exp. I	89.01	169.26	116.72	191.61	248.09	153.44		Exp. I	861.87	528.82	1304.75	585.73		Exp. I	649.84	533.67	1184.06	415.79
	Exp. II	541.72	638.49	627.38	369.36	775.86	631.57		Exp. II	493.5	312.06	1130.08	281.78		Exp. II	575.61	490.7	1127.57	400.03
	Exp. III	825.8	1028.62	644.84	916.38	1086.17	922.22		Exp. III	541.75	294.48	1094.96	253.96		Exp. III	1150.75	871.76	1256.62	890.2
	Exp. IV	977.02	1165.93	941.94	1153.79	1378.85	1172.84		Exp. IV	456.53	271.27	745.04	454.83		Exp. IV	433.3	569.92	869.37	284.49
	Exp. V	579.7	971.11	697.57	872.93	1075.7	709.63		Exp. V	425.33	297.36	712.43	405.19
	Norm to WT	WT	GPC1 KO +GPC2	GPC1 KO +GPC3	GPC1 KO +GPC4	GPC1 KO +GPC6	GPC1 KO +GPC1TM		Norm to WT	WT	GPC1 KO G4	G41	G45		Norm to WT	WT	WT +SDC4	GPC1 KO +GPC1 +SDC4	GPC1 KO +SDC4
		1	1.90158	1.31131	2.15268	2.78721	1.72385		Exp. I	1	0.613573	1.51386	0.679604		Exp. I	1	0.821233	1.82208	0.639834
		1	1.17863	1.15813	0.681828	1.43222	1.16586		Exp. II	1	0.63234	2.28993	0.570983		Exp. II	1	0.852487	1.95891	0.694967
		1	1.2456	0.780867	1.10969	1.31529	1.11676		Exp. III	1	0.543572	2.02115	0.468777		Exp. III	1	0.757558	1.092	0.773582
		1	1.19335	0.964095	1.18093	1.41128	1.20043		Exp. IV	1	0.5942	1.63196	0.996276		Exp. IV	1	1.3153	2.00639	0.656566
		1	1.67519	1.20333	1.50583	1.85561	1.22413		Exp. V	1	0.699128	1.67501	0.952649
															Mean		0.936645	1.71985	0.691237
	Mean		1.43887	1.08355	1.32619	1.76032	1.28621		Mean		0.616562	1.82638	0.733658		SD		0.255509	0.425795	0.0595511
	SD		0.329889	0.210755	0.547387	0.610558	0.247962		SD		0.0567949	0.320623	0.232633
	Norm to GPC1 KO +GPC2	WT	GPC1 KO +GPC2	GPC1 KO +GPC3	GPC1 KO +GPC4	GPC1 KO +GPC6	GPC1 KO +GPC1TM		Norm to GPC1 KO G4	WT	GPC1 KO G4	G41	G45		Norm to WT +SDC4	WT	WT +SDC4	GPC1 KO +GPC1 +SDC4	GPC1 KO +SDC4
		0.525877	1	0.68959	1.13205	1.46573	0.906534		Exp. I	1.6298	1	2.46729	1.10762		Exp. I	1.21768	1	1.82208	0.779114
		0.848439	1	0.9826	0.57849	1.21515	0.989162		Exp. II	1.58143	1	3.62135	0.902967		Exp. II	1.17304	1	1.95891	0.815223
		0.802823	1	0.626898	0.890883	1.05595	0.89656		Exp. III	1.83968	1	3.71828	0.862402		Exp. III	1.32003	1	1.092	1.02115
		0.837975	1	0.807887	0.989588	1.18262	1.00593		Exp. IV	1.68294	1	2.74649	1.67667		Exp. IV	0.760282	1	2.00639	0.499175
		0.596946	1	0.718322	0.898899	1.1077	0.730741		Exp. V	1.43035	1	2.39585	1.36262
															Mean	1.11776		1.71985	0.778666
	Mean	0.722412		0.765059	0.897981	1.20543	0.905785		Mean	1.63284		2.98985	1.18246		SD	0.246133		0.425795	0.214671
	SD	0.150059		0.137955	0.203288	0.158326	0.109209		SD	0.14912		0.635324	0.340168
	Norm to GPC1 KO +GPC3	WT	GPC1 KO +GPC2	GPC1 KO +GPC3					Norm to G41	WT	GPC1 KO G4	G41			Norm to GPC1 KO +GPC1 +SDC4	WT	WT +SDC4	GPC1 KO +GPC1 +SDC4
		0.762594	1.45014	1					Exp. I	0.660563	0.405304	1			Exp. I	0.548824	0.450712	1
		0.863464	1.01771	1					Exp. II	0.436695	0.27614	1			Exp. II	0.510487	0.435184	1
		1.28063	1.59516	1					Exp. III	0.494767	0.268941	1			Exp. III	0.91575	0.693734	1
		1.03724	1.2378	1					Exp. IV	0.612759	0.364101	1			Exp. IV	0.498407	0.655555	1
		0.831028	1.39213	1					Exp. V	0.597013	0.417388	1
															Mean	0.618367	0.558796
	Mean	0.954991	1.33859						Mean	0.560359	0.346375				SD	0.199417	0.134824
	SD	0.208306	0.220374						SD	0.0918223	0.0702828
