# Supplementary material for: Glypican-1 drives unconventional secretion of fibroblast growth factor 2
Source: eLife. 2022 Mar 29;11:e75545. doi: 10.7554/eLife.75545 (PMC8986318; doi:10.7554/eLife.75545)
Supplement: Figure 5—source data 1. [file elife-75545-fig5-data1.xlsx]

## Sheet: Sheet1
Exp. 1	with doxycycline (Panel B)												without doxycycline (Panel D)
	FGF2-GFP WT	surface area	nb particles	particles/area	normalization		FGF2-GFP +GPC1	surface area	nb particles	particles/area	normalization		FGF2-GFP	surface area	nb particles	particles/area	normalization		FGF2-GFP +GPC1	surface area	nb particles	particles/area	normalization
	1	292557	38	0.000129889	0.52776		1	486170	126	0.000259169	1.05304		1	552832	12	2.17064e-05	1.0878		1	363034	2	5.50913e-06	0.276086
	2	269670	45	0.000166871	0.678021		2	426982	76	0.000177993	0.723215		2	370944	5	1.34791e-05	0.675497		2	529792	4	7.55013e-06	0.37837
	3	206438	34	0.000164698	0.669195		3	405069	30	7.40615e-05	0.300923		3	149658	4	2.67276e-05	1.33944		3	276710	5	1.80695e-05	0.905538			Average of the 4 biological replicates
	4	196787	29	0.000147367	0.598777		4	303744	11	3.62147e-05	0.147146		4	390016	2	5.12799e-06	0.256986		4	296730	9	3.03306e-05	1.52			with doxycycline (Panel B)			without doxycycline (Panel D)
	5	77798	20	0.000257076	1.04454		5	471885	111	0.000235227	0.955763		5	507392	16	3.15338e-05	1.58029		5	224717	3	1.33501e-05	0.669032			FGF2-GFP WT	FGF2-GFP +GPC1		FGF2-GFP WT	FGF2-GFP +GPC1
	6	388096	22	5.6687e-05	0.230328		6	622874	342	0.000549068	2.23095		6	433331	9	2.07693e-05	1.04084		6	376320	6	1.59439e-05	0.799016			1	1.50804		1	4.2512
	7	200986	7	3.48283e-05	0.141513		7	246938	177	0.000716779	2.91238		7	354509	14	3.94912e-05	1.97908		7	325350	5	1.53681e-05	0.77016
	8	289536	80	0.000276304	1.12267		8	352742	207	0.000586831	2.38439		8	344704	12	3.48125e-05	1.7446		8	260608	3	1.15115e-05	0.576893
	9	340045	61	0.000179388	0.728881		9	189158	102	0.000539232	2.19098		9	433638	6	1.38364e-05	0.693403		9	399795	105	0.000262635	13.1617
	10	460928	56	0.000121494	0.493649		10	374042	270	0.000721844	2.93296		10	658611	21	3.18853e-05	1.59791		10	205363	42	0.000204516	10.2492
	11	246938	61	0.000247026	1.0037		11	335667	218	0.000649453	2.63883		11	220109	1	4.5432e-06	0.227679		11	276710	40	0.000144556	7.24431
	12	112230	27	0.000240577	0.977503		12	405965	255	0.000628133	2.5522		12	299750	3	1.00083e-05	0.501561		12	306842	78	0.000254202	12.7392
	13	347162	64	0.000184352	0.74905		13	342528	127	0.000370773	1.50651		13	189670	8	4.21785e-05	2.11375		13	465613	134	0.000287793	14.4225
	14	238515	18	7.5467e-05	0.306634		14	692557	274	0.000395635	1.60753		14	155981	0	0	0		14	255002	57	0.000223528	11.2019
	15	374835	47	0.000125389	0.509473		15	422861	220	0.000520266	2.11392		15	140058	2	1.42798e-05	0.715622		15	279322	12	4.29612e-05	2.15297
	16	407578	41	0.000100594	0.40873		16	131072	72	0.000549316	2.23196		16	172493	4	2.31893e-05	1.16212		16	334310	19	5.68335e-05	2.84817
	17	269030	56	0.000208155	0.845767		17	254080	104	0.00040932	1.66313		17	280141	10	3.56963e-05	1.7889		17	584166	24	4.10842e-05	2.05891
	18	394650	46	0.000116559	0.473597		18	333133	136	0.000408245	1.65876		18	174950	5	2.85796e-05	1.43225		18	477517	14	2.93183e-05	1.46927
	19	199373	22	0.000110346	0.448353		19	293530	113	0.000384969	1.56419		19	185549	5	2.69471e-05	1.35043		19	202675	7	3.45381e-05	1.73085
	20	135501	21	0.00015498	0.629709		20	294195	55	0.000186951	0.75961		20	389197	10	2.56939e-05	1.28763		20	350387	27	7.70577e-05	3.86169
	21	59904	20	0.000333868	1.35656		21	133248	26	0.000195125	0.792822		21	282931	7	2.4741e-05	1.23988		21	204109	10	4.89934e-05	2.45527
	22	391245	110	0.000281154	1.14237		22	263885	78	0.000295583	1.201		22	338918	9	2.65551e-05	1.33079		22	233958	9	3.84684e-05	1.92782
	23	310605	137	0.000441075	1.79215		23	276147	68	0.000246246	1.00053		23	216602	2	9.23353e-06	0.462732		23	215962	4	1.85218e-05	0.928206
	24	495693	232	0.000468032	1.90168		24	240538	79	0.00032843	1.33446		24	313907	6	1.91139e-05	0.957882		24	203162	39	0.000191965	9.62019
	25	425805	236	0.000554244	2.25198		25	952883	328	0.000344219	1.39861		25	605594	14	2.31178e-05	1.15853		25	191770	25	0.000130364	6.53313
	26	322970	135	0.000417995	1.69838		26	822323	312	0.000379413	1.54161		26	360499	4	1.10957e-05	0.556055		26	219878	34	0.000154631	7.74923
	27	307277	152	0.000494668	2.00991		27	261888	76	0.0002902	1.17913		27	265600	10	3.76506e-05	1.88683		27	78131	12	0.000153588	7.69697
	28	238925	81	0.000339019	1.37748		28	216346	45	0.000208	0.845137		28	364826	9	2.46693e-05	1.23628		28	263322	12	4.55716e-05	2.28379
	29	291686	99	0.000339406	1.37906		29	293427	29	9.88321e-05	0.40157		29	331802	4	1.20554e-05	0.604147		29	136294	9	6.60337e-05	3.30923
	30	207974	73	0.000351005	1.42619		30	260326	88	0.000338038	1.3735		30	262835	2	7.60934e-06	0.381337		30	153702	11	7.15671e-05	3.58653
	31	114714	39	0.000339976	1.38137		31	142899	23	0.000160953	0.653976		31	240333	8	3.32871e-05	1.66816		31	156518	14	8.94466e-05	4.48255
	32	101299	43	0.000424486	1.72475		32	246630	29	0.000117585	0.477766		32	224435	9	4.01007e-05	2.00962		32	181274	13	7.17146e-05	3.59393
	33	845338	297	0.000351339	1.42754		33	119066	15	0.000125981	0.511878		33	245760	2	8.13802e-06	0.407831		33	173107	9	5.1991e-05	2.60549
	34	144512	77	0.000532828	2.16496		34	297958	61	0.000204727	0.831837		34	117043	2	1.70877e-05	0.85634		34	414387	20	4.82641e-05	2.41872
	35	410803	155	0.00037731	1.53307		35	265318	51	0.000192222	0.781028		35	189005	6	3.17452e-05	1.59089		35	607590	20	3.29169e-05	1.64961
	36	129613	55	0.00042434	1.72416		36	189568	30	0.000158255	0.643013		36	126669	1	7.89459e-06	0.395632		36	644429	20	3.10352e-05	1.55531
	37	580096	246	0.000424068	1.72305		37	218624	41	0.000187537	0.76199		37	279910	5	1.78629e-05	0.895186		37	351770	10	2.84277e-05	1.42463
	38	390298	132	0.000338203	1.37417		38	371277	63	0.000169685	0.689455		38	311245	2	6.42581e-06	0.322025		38	269773	36	0.000133446	6.68753
	39	526208	242	0.000459894	1.86862		39	364032	42	0.000115374	0.468784		39	269312	1	3.71317e-06	0.186083		39	273152	30	0.000109829	5.504
	40	514970	149	0.000289337	1.17562		40	233626	96	0.000410913	1.6696		40	306458	1	3.26309e-06	0.163527		40	206464	38	0.000184051	9.22361
	41	315904	94	0.000297559	1.20903		41	214963	67	0.000311682	1.26641		41	646938	5	7.72872e-06	0.387319		41	244147	40	0.000163836	8.21051
	42	407629	112	0.00027476	1.11639		42	230963	63	0.000272771	1.10831		42	202368	2	9.88299e-06	0.495279		42	230682	30	0.000130049	6.51732
	43	111104	38	0.000342022	1.38969		43	55014	28	0.000508961	2.06799		43	286413	2	6.98292e-06	0.349944		43	291968	48	0.000164402	8.23887
	44	141798	45	0.000317353	1.28945		44	122342	67	0.000547645	2.22517		44	317747	9	2.83244e-05	1.41946		44	363520	37	0.000101783	5.10076
	45	123264	26	0.000210929	0.857039		45	232883	86	0.000369284	1.50046		45	319616	14	4.38026e-05	2.19513		45	462157	33	7.14043e-05	3.57838
	46	111437	23	0.000206395	0.838613		46	177357	69	0.000389046	1.58075		46	178560	11	6.16039e-05	3.08724		46	568832	28	4.92237e-05	2.46681
	47	276019	54	0.000195639	0.79491		47	220134	71	0.000322531	1.31049		47	206950	13	6.28171e-05	3.14804		47	370304	21	5.67102e-05	2.84199
	48	130355	13	9.97277e-05	0.405209		48	155546	53	0.000340735	1.38446		48	212198	8	3.77006e-05	1.88934		48	507418	17	3.3503e-05	1.67898
	49	102528	16	0.000156055	0.634075		49	472934	79	0.000167042	0.678719		49	278502	4	1.43626e-05	0.719769		49	321613	24	7.46238e-05	3.73972
	50	224922	27	0.000120042	0.487748		50	577357	126	0.000218236	0.886726		50	213786	2	9.35515e-06	0.468827		50	368666	16	4.33997e-05	2.17495
	51	230477	39	0.000169214	0.687544		51	295040	91	0.000308433	1.25321		51	226458	4	1.76633e-05	0.885185		51	390170	16	4.10078e-05	2.05508
	52	248781	21	8.44116e-05	0.342977		52	166374	50	0.000300528	1.22109		52	168832	4	2.36922e-05	1.18732		52	281395	6	2.13223e-05	1.06855
	53	152653	33	0.000216177	0.878359		53	205389	88	0.000428455	1.74088		53	378035	8	2.11621e-05	1.06052		53	250368	10	3.99412e-05	2.00163
	54	213146	38	0.000178282	0.724385		54	170957	49	0.000286622	1.16459		54	585830	4	6.82792e-06	0.342176		54	193869	11	5.67393e-05	2.84345
	55	127667	17	0.000133159	0.541045		55	189619	65	0.000342793	1.39282		55	253005	2	7.90498e-06	0.396153		55	205568	9	4.37811e-05	2.19406
	56	417459	95	0.000227567	0.924641		56	189670	61	0.000321611	1.30676		56	617421	10	1.61964e-05	0.811671		56	238387	8	3.35589e-05	1.68178
	57	339098	82	0.000241818	0.982544		57	212019	96	0.00045279	1.83975		57	702003	3	4.27349e-06	0.214163		57	237722	24	0.000100958	5.05945
	58	524262	109	0.000207911	0.844776		58	192410	76	0.00039499	1.6049		58	344474	0	0	0		58	192384	18	9.35629e-05	4.68884
	59	497126	74	0.000148856	0.604823		59	178867	62	0.000346626	1.4084		59	359040	1	2.7852e-06	0.139579		59	229760	19	8.2695e-05	4.1442
	60	565248	97	0.000171606	0.697262		60	350541	133	0.000379414	1.54162		60	447795	7	1.56322e-05	0.783394		60	214810	11	5.1208e-05	2.56626
	61	860826	139	0.000161473	0.656089		61	316314	126	0.000398338	1.61851		61	447002	1	2.23713e-06	0.112112		61	281190	13	4.62321e-05	2.31689
	62	272794	82	0.000300593	1.22136		62	153498	60	0.000390885	1.58822		62	248090	2	8.06159e-06	0.404001		62	216858	5	2.30566e-05	1.15546
	63	140800	32	0.000227273	0.923444		63	219366	83	0.000378363	1.53735		63	316851	5	1.57803e-05	0.790818		63	149478	9	6.02095e-05	3.01736
	64	212173	63	0.000296928	1.20646		64	157338	73	0.000463969	1.88518		64	251034	2	7.96705e-06	0.399263		64	177664	3	1.68858e-05	0.84622
	65	319616	95	0.000297232	1.2077		65	364851	116	0.000317938	1.29183		65	320973	8	2.49242e-05	1.24906		65	155674	2	1.28474e-05	0.643836
	66	195635	65	0.000332251	1.34999		66	549248	84	0.000152936	0.621404		66	333696	14	4.19544e-05	2.10251		66	332237	9	2.70891e-05	1.35755
	67	169574	43	0.000253577	1.03032		67	252134	63	0.000249867	1.01525		67	283930	7	2.4654e-05	1.23552		67	249370	4	1.60404e-05	0.803854
	68	179226	40	0.000223182	0.906822		68	197581	39	0.000197387	0.802015		68	304973	5	1.63949e-05	0.821619		68	290790	8	2.75113e-05	1.37871
	69	292173	72	0.000246429	1.00128		69	390093	98	0.000251222	1.02075		69	418253	3	7.17269e-06	0.359454		69	320691	14	4.36557e-05	2.18778
	70	221850	49	0.00022087	0.897429		70	307584	93	0.000302356	1.22852		70	254003	5	1.96848e-05	0.98649		70	262733	15	5.70922e-05	2.86113
	71	625306	56	8.95562e-05	0.36388		71	203110	33	0.000162474	0.660155		71	279245	4	1.43243e-05	0.717854		71	411085	10	2.43259e-05	1.21907
	72	379494	51	0.000134389	0.546045		72	294554	27	9.1664e-05	0.372445		72	288128	3	1.0412e-05	0.521792		72	334950	9	2.68697e-05	1.34656
	73	376013	55	0.000146272	0.594324		73	319411	158	0.00049466	2.00988		73	614272	12	1.95353e-05	0.978999		73	1015450	47	4.62849e-05	2.31954
	74	467277	66	0.000141244	0.573895		74	351488	179	0.000509263	2.06922		74	284749	11	3.86305e-05	1.93594		74	551808	29	5.25545e-05	2.63373
	75	411264	63	0.000153186	0.622419		75	374682	172	0.000459056	1.86521		75	651290	15	2.30312e-05	1.15419		75	833280	29	3.48022e-05	1.74409
	76	471552	58	0.000122998	0.49976		76	328499	96	0.000292238	1.18741		76	378547	7	1.84918e-05	0.926702		76	378189	7	1.85093e-05	0.927579
	77	220186	35	0.000158957	0.645865		77	622234	128	0.00020571	0.835833		77	163661	2	1.22204e-05	0.612416		77	548557	23	4.19282e-05	2.1012
	78	383795	56	0.000145911	0.59286		78	287334	91	0.000316705	1.28682		78	920883	14	1.52028e-05	0.761878		78	279834	10	3.57355e-05	1.79086
	79	423014	53	0.000125291	0.509078		79	390861	115	0.000294222	1.19547		79	281830	6	2.12894e-05	1.0669		79	506726	15	2.96018e-05	1.48347
	80	417690	47	0.000112524	0.457201		80	154496	37	0.000239488	0.973078		80	286054	9	3.14626e-05	1.57673		80	1069978	45	4.20569e-05	2.10765
	81	426957	40	9.36862e-05	0.380662		81	184806	55	0.000297609	1.20923		81	339686	8	2.35512e-05	1.18025		81	190106	43	0.00022619	11.3353
	82	292122	48	0.000164315	0.667637		82	108979	18	0.000165169	0.671109		82	239488	5	2.08779e-05	1.04628		82	172774	44	0.000254668	12.7625
	83	244966	48	0.000195946	0.796157		83	205466	59	0.000287152	1.16674		83	288435	12	4.16038e-05	2.08495		83	145280	28	0.000192731	9.65859
	84	214707	31	0.000144383	0.58665		84	267264	73	0.000273138	1.1098		84	294963	12	4.06831e-05	2.0388		84	312115	23	7.36908e-05	3.69296
	85	302490	38	0.000125624	0.51043		85	249574	64	0.000256437	1.04194		85	228506	6	2.62575e-05	1.31588		85	136678	27	0.000197545	9.89981
	86	330163	30	9.08642e-05	0.369195		86	167117	30	0.000179515	0.729397		86	515917	19	3.68276e-05	1.84559		86	284211	51	0.000179444	8.99272
	87	223514	26	0.000116324	0.472642		87	205030	36	0.000175584	0.713425		87	218778	7	3.19959e-05	1.60345		87	369613	40	0.000108221	5.42343
	88	312883	106	0.000338785	1.37653								88	239821	12	5.00373e-05	2.50759		88	262272	17	6.48182e-05	3.24832
	89	352845	124	0.000351429	1.42791								89	239514	4	1.67005e-05	0.836933		89	392320	12	3.05873e-05	1.53286
	90	169830	66	0.000388624	1.57904								90	187008	4	2.13895e-05	1.07192		90	300800	26	8.64362e-05	4.33169
	91	349619	137	0.000391855	1.59217								91	422733	4	9.46224e-06	0.474193		91	686925	22	3.20268e-05	1.605
	92	169856	61	0.000359128	1.45919								92	308275	1	3.24386e-06	0.162564		92	335821	8	2.38222e-05	1.19383
	93	448358	168	0.000374701	1.52247								93	155930	0	0	0		93	355379	7	1.96973e-05	0.987115
	94	99482	42	0.000422187	1.71541								94	182400	2	1.09649e-05	0.549499		94	264218	8	3.0278e-05	1.51736
	95	253466	87	0.000343241	1.39464								95	203571	0	0	0		95	217190	6	2.76256e-05	1.38444
	96	94438	22	0.000232957	0.94654								96	188902	0	0	0		96	384358	6	1.56104e-05	0.782307
	97	209613	82	0.000391197	1.58949								97	344474	2	5.80595e-06	0.290961		97	306381	7	2.28474e-05	1.14498
	98	283443	100	0.000352805	1.4335								98	344320	5	1.45214e-05	0.727729		98	154573	6	3.88166e-05	1.94527
	99	289254	97	0.000335345	1.36256								99	261171	5	1.91445e-05	0.959415		99	407962	17	4.16705e-05	2.08829
	100	287027	51	0.000177684	0.721956								100	174848	3	1.71578e-05	0.859849		100	238643	8	3.35229e-05	1.67998
	101	137242	46	0.000335174	1.36187								101	120448	0	0	0		101	243942	12	4.9192e-05	2.46522
	102	187469	42	0.000224037	0.910297								102	160358	0	0	0
	103	52531	15	0.000285546	1.16022								103	238054	1	4.20073e-06	0.210517
	104	76160	29	0.000380777	1.54716								104	362214	14	3.86512e-05	1.93698
	105	360986	98	0.000271479	1.10306								105	415770	22	5.29139e-05	2.65174
	106	306458	80	0.000261047	1.06067								106	351258	7	1.99284e-05	0.998696
	107	956339	178	0.000186126	0.75626								107	175462	7	3.98947e-05	1.99929
	108	361626	85	0.000235049	0.955042								108	282138	13	4.60767e-05	2.3091
	109	512026	144	0.000281236	1.1427								109	310093	13	4.19229e-05	2.10094
	110	254874	64	0.000251104	1.02028								110	362061	16	4.41914e-05	2.21462
													111	337613	17	5.03535e-05	2.52343
													112	252723	6	2.37414e-05	1.18978
													113	243226	9	3.70026e-05	1.85436
													114	234522	5	2.132e-05	1.06843
													115	412877	14	3.39084e-05	1.6993
													116	187008	1	5.34736e-06	0.267979
													117	191872	0	0	0
													118	276480	2	7.2338e-06	0.362517
													119	234829	2	8.51684e-06	0.426815
													120	321818	5	1.55367e-05	0.778612
													121	417306	3	7.18897e-06	0.36027
													122	203034	3	1.47759e-05	0.740481
													123	184090	3	1.62964e-05	0.816681
													124	184090	3	1.62964e-05	0.816681
													125	288794	4	1.38507e-05	0.694118
													126	206490	1	4.84285e-06	0.242696
													127	193741	1	5.16153e-06	0.258666
													128	219059	3	1.36949e-05	0.686312
													129	285773	9	3.14935e-05	1.57828
													130	287078	9	3.13504e-05	1.5711
													131	238771	2	8.37623e-06	0.419769
													132	156314	1	6.39738e-06	0.3206
													133	192538	2	1.03876e-05	0.520565
													134	256205	0	0	0
													135	362138	10	2.76138e-05	1.38385
													136	330368	4	1.21077e-05	0.606769
													137	271232	5	1.84344e-05	0.923827
													138	312013	9	2.8845e-05	1.44554
													139	465997	14	3.00431e-05	1.50559
													140	451098	16	3.5469e-05	1.7775
													141	145587	5	3.43437e-05	1.72111
													142	372045	3	8.06354e-06	0.404099
													143	315699	3	9.50272e-06	0.476222
				0.000246114	1						1.29742					1.99544e-05	1						3.65384
Exp. 2	with doxycycline (Panel B)												without doxycycline (Panel D)
	FGF2-GFP WT	surface area	nb particles	particles/area	normalization		FGF2-GFP +GPC1	surface area	nb particles	particles/area	normalization		FGF2-GFP WT	surface area	nb particles	particles/area	normalization		FGF2-GFP +GPC1	surface area	nb particles	particles/area	normalization
	1	482662	136	0.000281771	1.01607		1	225562	116	0.000514271	1.85448		1	217421	5	2.29969e-05	0.869741		1	732058	14	1.91242e-05	0.723276
	2	534195	208	0.000389371	1.40408		2	354074	117	0.000330439	1.19157		2	208742	7	3.35342e-05	1.26826		2	810803	17	2.09669e-05	0.792967
	3	772352	157	0.000203275	0.733016		3	214682	131	0.000610205	2.20042		3	124877	8	6.4063e-05	2.42286		3	246963	7	2.83443e-05	1.07198
	4	835533	157	0.000187904	0.677588		4	211968	132	0.000622736	2.2456		4	152678	11	7.20471e-05	2.72482		4	340429	10	2.93747e-05	1.11095
	5	340762	96	0.000281722	1.0159		5	206925	164	0.000792558	2.85799		5	109210	0	0	0		5	191539	7	3.65461e-05	1.38217
	6	378138	73	0.000193051	0.696149		6	259226	182	0.00070209	2.53176		6	233139	4	1.71571e-05	0.648883		6	312806	13	4.15593e-05	1.57177
	7	349414	109	0.000311951	1.1249		7	183398	117	0.000637957	2.30049		7	193203	0	0	0		7	217293	8	3.68166e-05	1.39241
	8	368794	97	0.000263019	0.948456		8	201344	124	0.000615861	2.22081		8	124262	1	8.04751e-06	0.304357		8	407014	11	2.70261e-05	1.02213
	9	266650	82	0.000307519	1.10892		9	147840	65	0.000439665	1.58544		9	588570	19	3.22816e-05	1.22089		9	107648	2	1.85791e-05	0.70266
	10	249754	86	0.000344339	1.2417		10	113971	13	0.000114064	0.411319		10	352666	8	2.26844e-05	0.857922		10	313830	7	2.23051e-05	0.843577
	11	268749	75	0.000279071	1.00634		11	152781	74	0.000484353	1.74659		11	213709	5	2.33963e-05	0.884848		11	279962	9	3.21472e-05	1.21581
	12	198042	63	0.000318114	1.14713		12	115661	78	0.000674385	2.43185		12	245120	12	4.89556e-05	1.8515		12	297216	14	4.71038e-05	1.78146
	13	262042	23	8.77722e-05	0.316509		13	181914	114	0.00062667	2.25979		13	173440	7	4.03598e-05	1.52641		13	348723	11	3.15437e-05	1.19298
	14	315238	31	9.83384e-05	0.354611		14	172749	94	0.000544142	1.96219		14	201523	8	3.96977e-05	1.50137		14	334029	8	2.395e-05	0.905789
	15	355840	29	8.14973e-05	0.293882		15	316672	232	0.000732619	2.64185		15	178970	8	4.47002e-05	1.69056		15	407091	8	1.96516e-05	0.743224
	16	295603	28	9.47216e-05	0.341569		16	334618	188	0.000561835	2.02599		16	369306	25	6.76945e-05	2.56021		16	213939	2	9.34846e-06	0.353559
	17	315648	28	8.87064e-05	0.319878		17	312883	170	0.000543334	1.95928		17	340147	24	7.05577e-05	2.66849		17	197555	0	0	0
	18	772198	118	0.000152811	0.551039		18	284467	131	0.00046051	1.66061		18	313702	13	4.14406e-05	1.56728		18	185677	6	3.23142e-05	1.22212
	19	346522	68	0.000196236	0.707632		19	253696	148	0.000583375	2.10367		19	314061	11	3.5025e-05	1.32465		19	286720	4	1.39509e-05	0.527623
	20	272947	65	0.000238141	0.858745		20	255718	170	0.000664795	2.39727		20	353254	16	4.52932e-05	1.71299		20	206080	2	9.70497e-06	0.367042
	21	168422	28	0.000166249	0.599499		21	717747	397	0.00055312	1.99457		21	342451	6	1.75208e-05	0.662635		21	713062	4	5.60961e-06	0.212155
	22	366387	71	0.000193784	0.698792		22	320077	163	0.000509252	1.83638		22	346368	15	4.33065e-05	1.63785		22	257690	2	7.76126e-06	0.293531
	23	212634	26	0.000122276	0.44093		23	652979	276	0.000422678	1.52419		23	304102	6	1.97302e-05	0.746197		23	259302	5	1.92825e-05	0.729265
	24	157594	27	0.000171326	0.617808		24	301952	130	0.000430532	1.55251		24	372813	10	2.68231e-05	1.01445		24	213914	2	9.34955e-06	0.3536
	25	112384	17	0.000151267	0.545474		25	251213	156	0.000620987	2.2393		25	356864	6	1.68131e-05	0.635872		25	311578	2	6.41894e-06	0.242764
	26	166451	54	0.00032442	1.16987		26	116506	61	0.000523578	1.88804		26	368230	11	2.98726e-05	1.12978		26	221952	3	1.35164e-05	0.511191
	27	255770	90	0.000351879	1.26889		27	308301	159	0.00051573	1.85974		27	273894	5	1.82552e-05	0.690413		27	165990	3	1.80734e-05	0.683535
	28	212480	105	0.000494164	1.78197		28	341888	229	0.00066981	2.41536		28	284646	18	6.32364e-05	2.3916		28	281830	4	1.4193e-05	0.536777
	29	183885	85	0.000462245	1.66687		29	348237	263	0.000755233	2.72339		29	306509	10	3.26255e-05	1.23389		29	163456	0	0	0
	30	201779	96	0.000475768	1.71563		30	302029	206	0.000682054	2.45951		30	354739	21	5.91985e-05	2.23888		30	277120	1	3.60855e-06	0.136475
	31	165530	67	0.00040476	1.45958		31	159334	82	0.000514642	1.85582		31	272026	7	2.57328e-05	0.973216		31	422938	27	6.38391e-05	2.4144
	32	160256	73	0.000455521	1.64262		32	314547	156	0.000495951	1.78842		32	274662	22	8.00984e-05	3.02932		32	325120	7	2.15305e-05	0.814284
	33	318438	95	0.000298331	1.07579		33	273101	131	0.000479676	1.72973		33	206438	14	6.7817e-05	2.56484		33	364442	23	6.31102e-05	2.38683
	34	355558	132	0.000371247	1.33873		34	280678	152	0.000541546	1.95283		34	274432	11	4.00828e-05	1.51593		34	271590	12	4.41842e-05	1.67105
	35	308070	111	0.000360308	1.29928		35	279450	130	0.000465199	1.67752		35	273178	13	4.7588e-05	1.79978		35	366925	20	5.45071e-05	2.06146
	36	248320	76	0.000306057	1.10365		36	181069	57	0.000314797	1.13517		36	282906	22	7.77643e-05	2.94105		36	377779	5	1.32353e-05	0.500557
	37	516122	122	0.000236378	0.852387		37	231142	98	0.000423982	1.52889		37	392755	9	2.2915e-05	0.866647		37	424883	8	1.88287e-05	0.712102
	38	431846	91	0.000210723	0.759874		38	242432	103	0.000424861	1.53206		38	124083	5	4.02956e-05	1.52398		38	653491	8	1.22419e-05	0.46299
	39	321818	78	0.000242373	0.874004		39	268237	74	0.000275875	0.994815		39	253082	25	9.87822e-05	3.73594		39	713677	7	9.80836e-06	0.370952
	40	330163	36	0.000109037	0.393191		40	259533	102	0.000393014	1.41722		40	307814	8	2.59897e-05	0.982931		40	230426	6	2.60387e-05	0.984784
	41	317978	50	0.000157244	0.567025		41	297242	99	0.000333062	1.20103		41	307814	5	1.62436e-05	0.614332		41	400051	9	2.24971e-05	0.850841
	42	442931	105	0.000237057	0.854836		42	223386	63	0.000282023	1.01698		42	185933	2	1.07566e-05	0.406813		42	410624	10	2.43532e-05	0.921037
	43	422451	66	0.000156231	0.563374		43	164992	39	0.000236375	0.852376		43	149350	10	6.69568e-05	2.53231		43	457702	11	2.40331e-05	0.908932
	44	312294	64	0.000204935	0.739002		44	285926	145	0.000507124	1.82871		44	181402	9	4.96136e-05	1.87638		44	280525	12	4.27769e-05	1.61782
	45	486630	88	0.000180836	0.652098		45	261222	134	0.000512974	1.8498		45	159949	6	3.7512e-05	1.4187		45	332339	7	2.10628e-05	0.796596
	46	350976	51	0.000145309	0.523989		46	273331	162	0.000592688	2.13725		46	176512	1	5.66534e-06	0.214263		46	347981	3	8.62116e-06	0.326052
	47	223206	34	0.000152326	0.549291		47	225690	177	0.000784262	2.82807		47	245402	0	0	0		47	175155	0	0	0
	48	204237	21	0.000102822	0.370778		48	267162	142	0.000531513	1.91665		48	289306	1	3.45655e-06	0.130727		48	311680	0	0	0
	49	214118	36	0.000168132	0.606288		49	178893	127	0.000709922	2.56		49	205619	6	2.91802e-05	1.10359		49	289792	13	4.48598e-05	1.6966
	50	133606	18	0.000134724	0.485821		50	223616	155	0.000693153	2.49953		50	304205	3	9.86177e-06	0.372972		50	279654	7	2.50309e-05	0.94667
	51	243405	40	0.000164335	0.592598		51	286490	176	0.000614332	2.2153		51	307814	3	9.74615e-06	0.368599		51	338406	11	3.25053e-05	1.22935
	52	355968	70	0.000196647	0.709115		52	282906	207	0.000731692	2.6385		52	2708070	30	1.1078e-05	0.41897		52	315827	27	8.54898e-05	3.23322
	53	543821	96	0.000176529	0.636568		53	306176	157	0.000512777	1.84909		53	279142	5	1.7912e-05	0.677433		53	225178	14	6.2173e-05	2.35138
	54	197658	26	0.00013154	0.474338		54	258458	112	0.000433339	1.56263		54	276173	4	1.44837e-05	0.547772		54	323558	27	8.34472e-05	3.15597
	55	159667	29	0.000181628	0.654956		55	236211	121	0.000512254	1.8472		55	190746	0	0	0		55	347827	13	3.73749e-05	1.41352
	56	381542	87	0.000228022	0.822255		56	176896	97	0.000548345	1.97735		56	236339	4	1.69248e-05	0.640097		56	351590	13	3.69749e-05	1.39839
	57	341734	66	0.000193133	0.696442		57	208845	131	0.000627259	2.26192		57	208358	4	1.91977e-05	0.726058		57	341146	45	0.000131908	4.98877
	58	307174	72	0.000234395	0.845235								58	262400	6	2.28659e-05	0.864786		58	167450	28	0.000167214	6.32404
	59	172646	29	0.000167974	0.605719								59	145485	1	6.87356e-06	0.259958		59	197146	18	9.13029e-05	3.45307
	60	130227	22	0.000168936	0.609188								60	154573	3	1.94083e-05	0.734022		60	117555	18	0.00015312	5.79099
	61	95872	14	0.000146028	0.526582								61	138470	1	7.22178e-06	0.273128		61	247040	34	0.00013763	5.20515
	62	203213	33	0.000162391	0.585588								62	318976	8	2.50803e-05	0.948535		62	117504	15	0.000127655	4.82792
	63	267981	34	0.000126875	0.457514								63	415309	16	3.85255e-05	1.45704		63	59418	8	0.000134639	5.09206
	64	274381	74	0.000269698	0.972539								64	180659	9	4.98176e-05	1.8841		64	185011	26	0.000140532	5.31493
	65	438426	111	0.000253178	0.912969								65	152781	8	5.23625e-05	1.98035		65	333978	23	6.88668e-05	2.60454
	66	212352	77	0.000362605	1.30757								66	263168	5	1.89993e-05	0.718552		66	282189	18	6.3787e-05	2.41243
	67	146816	37	0.000252016	0.908778								67	384973	10	2.59758e-05	0.982406		67	229965	9	3.91364e-05	1.48014
	68	368794	104	0.000282	1.0169								68	197069	3	1.52231e-05	0.575737		68	568986	11	1.93326e-05	0.73116
	69	312269	115	0.000368272	1.328								69	220032	4	1.81792e-05	0.687536		69	261402	9	3.44297e-05	1.30213
	70	368000	120	0.000326087	1.17588								70	199270	4	2.00733e-05	0.759171		70	382566	20	5.22786e-05	1.97717
	71	115456	48	0.000415743	1.49918								71	325965	2	6.13563e-06	0.232049		71	265011	17	6.41483e-05	2.42609
	72	115891	34	0.000293379	1.05793								72	384845	9	2.3386e-05	0.88446		72	276045	11	3.98486e-05	1.50707
	73	205619	65	0.000316119	1.13993								73	512538	6	1.17064e-05	0.442738		73	259021	20	7.72138e-05	2.92023
	74	720870	240	0.000332931	1.20056								74	520090	18	3.46094e-05	1.30893		74	258227	21	8.13238e-05	3.07567
	75	422784	113	0.000267276	0.963805								75	317901	8	2.51651e-05	0.951743		75	228045	9	3.94659e-05	1.4926
	76	367027	85	0.000231591	0.835123								76	290074	11	3.79214e-05	1.43419		76	297728	8	2.68702e-05	1.01623
	77	227430	53	0.000233039	0.840345								77	197376	7	3.54653e-05	1.3413		77	424806	15	3.53102e-05	1.33543
	78	130534	23	0.000176199	0.63538								78	156698	0	0	0		78	315648	8	2.53447e-05	0.958536
	79	154778	35	0.00022613	0.815433								79	228480	2	8.7535e-06	0.331057		79	266906	10	3.74664e-05	1.41698
	80	166426	45	0.00027039	0.975036								80	330726	14	4.23311e-05	1.60096		80	197094	15	7.61058e-05	2.87832
	81	139750	33	0.000236136	0.851513								81	276813	9	3.25129e-05	1.22964		81	360371	9	2.49743e-05	0.944526
	82	100250	19	0.000189526	0.683437								82	283776	6	2.11434e-05	0.799645		82	276966	8	2.88844e-05	1.09241
	83	355814	82	0.000230457	0.831037								83	172416	2	1.15999e-05	0.438706		83	280371	13	4.63671e-05	1.7536
	84	386714	133	0.000343923	1.2402								84	134707	2	1.4847e-05	0.561515		84	218496	6	2.74605e-05	1.03855
	85	350182	112	0.000319834	1.15333								85	156544	0	0	0		85	216858	7	3.22792e-05	1.2208
	86	259610	93	0.00035823	1.29179								86	213120	1	4.69219e-06	0.177459		86	913075	40	4.3808e-05	1.65682
	87	260787	88	0.00033744	1.21682								87	194074	5	2.57634e-05	0.97437		87	937958	43	4.58443e-05	1.73383
	88	290842	118	0.000405719	1.46303								88	354944	3	8.45204e-06	0.319656		88	338176	23	6.80119e-05	2.57221
	89	326554	130	0.000398096	1.43555								89	249754	3	1.20118e-05	0.454287		89	157363	11	6.99021e-05	2.6437
	90	245197	96	0.000391522	1.41184								90	282419	3	1.06225e-05	0.401743		90	141440	12	8.48416e-05	3.20871
	91	235546	63	0.000267464	0.964482								91	206157	2	9.70134e-06	0.366905		91	148275	2	1.34885e-05	0.510133
	92	197402	42	0.000212764	0.767233								92	432742	6	1.38651e-05	0.524377		92	328294	26	7.91973e-05	2.99524
	93	321254	128	0.000398439	1.43678								93	440499	4	9.08061e-06	0.343429		93	201421	11	5.4612e-05	2.06542
	94	274227	136	0.000495939	1.78837								94	356762	2	5.60598e-06	0.212018		94	306150	11	3.59301e-05	1.35888
	95	257664	115	0.000446318	1.60944								95	393907	3	7.61601e-06	0.288037		95	267059	13	4.86784e-05	1.84102
	96	273946	105	0.000383287	1.38215								96	265088	4	1.50893e-05	0.570678		96	266624	20	7.5012e-05	2.83695
	97	318157	135	0.000424319	1.53011								97	137984	0	0	0		97	231194	10	4.32537e-05	1.63586
	98	349850	134	0.000383021	1.38119								98	604570	9	1.48866e-05	0.563012		98	164275	9	5.47862e-05	2.07201
	99	179354	47	0.000262052	0.944966								99	319514	8	2.5038e-05	0.946938		99	310144	27	8.70563e-05	3.29247
	100	184806	42	0.000227265	0.819526								100	314445	9	2.86219e-05	1.08248		100	144205	11	7.62803e-05	2.88492
	101	330291	68	0.000205879	0.742406								101	377165	7	1.85595e-05	0.701921		101	132275	7	5.29201e-05	2.00144
	102	393293	113	0.000287318	1.03608								102	854554	11	1.28722e-05	0.486827		102	127360	2	1.57035e-05	0.593907
	103	193306	44	0.000227618	0.820799								103	387558	12	3.09631e-05	1.17102		103	296422	11	3.71093e-05	1.40347
	104	303488	119	0.000392108	1.41395								104	364749	8	2.19329e-05	0.829502		104	300416	8	2.66297e-05	1.00714
	105	332570	156	0.000469074	1.6915								105	112307	3	2.67125e-05	1.01027		105	156058	7	4.48551e-05	1.69642
	106	379981	139	0.000365808	1.31911								106	216320	2	9.24556e-06	0.349667		106	157926	12	7.5985e-05	2.87375
	107	225741	80	0.000354388	1.27794								107	315110	4	1.2694e-05	0.480086		107	191488	10	5.22226e-05	1.97506
	108	174438	79	0.000452883	1.63311								108	379110	6	1.58265e-05	0.59856		108	188595	6	3.18142e-05	1.20321
	109	224819	103	0.000458146	1.65209								109	296499	5	1.68635e-05	0.637776		109	204698	5	2.44262e-05	0.9238
	110	274688	160	0.000582479	2.10044								110	291686	12	4.11401e-05	1.55592		110	190285	7	3.67869e-05	1.39128
	111	335514	164	0.000488802	1.76264								111	296678	2	6.74132e-06	0.254956		111	203699	16	7.85473e-05	2.97066
	112	278426	107	0.000384303	1.38581								112	366234	5	1.36525e-05	0.516336		112	225434	16	7.09742e-05	2.68424
	113	209229	84	0.000401474	1.44773								113	263091	6	2.28058e-05	0.862515		113	218931	10	4.56765e-05	1.72748
	114	354816	164	0.000462211	1.66675								114	328730	8	2.43361e-05	0.92039
	115	284595	155	0.000544634	1.96397								115	142899	2	1.39959e-05	0.529325
													116	128717	0	0	0
													117	320870	5	1.55826e-05	0.589335
													118	287744	17	5.90803e-05	2.23442
													119	776781	26	3.34715e-05	1.26589
													120	214528	17	7.92437e-05	2.997
													121	247142	7	2.83238e-05	1.07121
													122	264806	4	1.51054e-05	0.571286
													123	253312	0	0	0
													124	308557	7	2.26862e-05	0.857994
													125	426368	15	3.51809e-05	1.33054
													126	317133	6	1.89195e-05	0.715536
													127	310426	13	4.18779e-05	1.58382
				0.000277313	1						1.92521					2.6441e-05	1						1.6654
Exp. 3	with doxycycline (Panel B)												without doxycycline (Panel D)
	FGF2-GFP WT	surface area	nb particles	particles/area	normalization		FGF2-GFP +GPC1	surface area	nb particles	particles/area	normalization		FGF2-GFP WT	surface area	nb particles	particles/area	normalization		FGF2-GFP +GPC1	surface area	nb particles	particles/area	normalization
	1	361549	106	0.000293183	1.05629		1	293606	40	0.000136237	0.490841		1	541542	1	1.84658e-06	0.170125		1	216730	2	9.22807e-06	0.85018
	2	189082	95	0.000502428	1.81017		2	275456	37	0.000134323	0.483944		2	462259	8	1.73063e-05	1.59443		2	295706	13	4.39626e-05	4.05026
	3	143514	68	0.000473821	1.70711		3	315162	37	0.0001174	0.422974		3	178637	0	0	0		3	346010	14	4.04613e-05	3.72769
	4	197504	78	0.000394929	1.42287		4	384589	53	0.000137809	0.496506		4	568602	12	2.11044e-05	1.94434		4	370330	11	2.97032e-05	2.73655
	5	373606	124	0.0003319	1.19579		5	344141	23	6.68331e-05	0.240789		5	435200	8	1.83824e-05	1.69356		5	301773	8	2.651e-05	2.44236
	6	309939	89	0.000287153	1.03457		6	279142	53	0.000189868	0.684063		6	597402	4	6.69566e-06	0.616869		6	367539	7	1.90456e-05	1.75467
	7	169139	40	0.000236492	0.852044		7	288256	179	0.000620976	2.23728		7	163200	2	1.22549e-05	1.12904		7	348109	11	3.15993e-05	2.91124
	8	174822	51	0.000291725	1.05104		8	291661	135	0.000462866	1.66764		8	547661	6	1.09557e-05	1.00934		8	289510	8	2.76329e-05	2.54581
	9	278758	110	0.000394608	1.42171		9	169037	90	0.000532428	1.91826		9	1286810	9	6.99404e-06	0.644359		9	339686	5	1.47195e-05	1.3561
	10	346982	154	0.000443827	1.59904		10	459725	221	0.000480722	1.73197		10	418176	4	9.56535e-06	0.881253		10	348570	12	3.44264e-05	3.17169
	11	101683	55	0.000540897	1.94877		11	521907	207	0.000396622	1.42897		11	290304	1	3.44466e-06	0.317356		11	263936	9	3.40992e-05	3.14155
	12	96691	43	0.000444716	1.60224		12	225638	124	0.000549553	1.97995		12	217626	1	4.59504e-06	0.42334		12	381978	9	2.35616e-05	2.17072
	13	150861	64	0.000424232	1.52844		13	257152	177	0.000688309	2.47987		13	500531	8	1.5983e-05	1.47251		13	336538	9	2.67429e-05	2.46382
	14	420198	151	0.000359354	1.2947		14	437453	298	0.000681216	2.45432		14	343808	2	5.8172e-06	0.535937		14	263117	5	1.9003e-05	1.75074
	15	562253	127	0.000225877	0.8138		15	565914	294	0.000519514	1.87173		15	319155	2	6.26655e-06	0.577335		15	460621	14	3.03938e-05	2.80017
	16	447488	84	0.000187715	0.676306		16	392371	206	0.000525013	1.89154		16	352589	7	1.98531e-05	1.82907		16	227584	11	4.83338e-05	4.45298
	17	429261	131	0.000305176	1.0995		17	306048	170	0.000555468	2.00127		17	309939	1	3.22644e-06	0.297251		17	327910	19	5.79427e-05	5.33825
	18	462848	157	0.000339204	1.2221		18	312909	129	0.00041226	1.48531		18	168115	0	0	0		18	471680	18	3.81615e-05	3.51581
	19	357376	54	0.000151101	0.544395		19	215066	104	0.000483572	1.74224		19	138726	4	2.88338e-05	2.65645		19	393830	11	2.79308e-05	2.57326
	20	307840	84	0.000272869	0.983105		20	471885	208	0.000440785	1.58808		20	63744	1	1.56878e-05	1.44531		20	675686	20	2.95995e-05	2.727
	21	258816	45	0.000173869	0.626422		21	555392	278	0.000500547	1.80339		21	341376	5	1.46466e-05	1.34939		21	446234	22	4.93015e-05	4.54213
	22	418458	131	0.000313054	1.12789		22	493875	283	0.000573019	2.0645		22	218803	3	1.3711e-05	1.26319		22	613146	31	5.05589e-05	4.65798
	23	326118	121	0.000371031	1.33677		23	385178	226	0.000586742	2.11394		23	265574	9	3.38889e-05	3.12217		23	677453	112	0.000165325	15.2314
	24	439270	125	0.000284563	1.02524		24	438451	272	0.000620366	2.23508		24	184397	1	5.42308e-06	0.499627		24	305971	14	4.5756e-05	4.21549
	25	488013	222	0.000454906	1.63896		25	284339	151	0.000531056	1.91331		25	213683	7	3.27588e-05	3.01806		25	241946	9	3.71984e-05	3.42708
	26	375398	110	0.000293022	1.05571		26	259149	169	0.000652134	2.34954		26	152499	3	1.96723e-05	1.8124		26	392294	14	3.56875e-05	3.28788
	27	228429	119	0.00052095	1.8769		27	180326	124	0.000687643	2.47747		27	300262	3	9.99127e-06	0.920494		27	361933	24	6.63106e-05	6.10918
	28	498099	126	0.000252962	0.911382		28	562560	389	0.000691482	2.4913		28	394189	2	5.07371e-06	0.467439		28	336435	16	4.75575e-05	4.38146
	29	386765	144	0.000372319	1.34141		29	142490	108	0.000757948	2.73077		29	299238	3	1.00255e-05	0.923644		29	423091	10	2.36356e-05	2.17754
	30	173235	45	0.000259763	0.935885		30	267059	168	0.000629074	2.26646		30	149581	1	6.68534e-06	0.615919		30	234214	7	2.98872e-05	2.7535
	31	206643	66	0.000319391	1.15072		31	475238	245	0.000515531	1.85738		31	221747	2	9.01929e-06	0.830945		31	166810	12	7.19381e-05	6.62764
	32	416205	113	0.000271501	0.978176		32	373274	286	0.000766193	2.76048		32	183347	3	1.63624e-05	1.50747		32	207744	26	0.000125154	11.5304
	33	402432	119	0.000295702	1.06537		33	476928	292	0.000612252	2.20585		33	334413	3	8.97094e-06	0.826491		33	277222	45	0.000162325	14.9549
	34	425907	167	0.000392104	1.41269		34	371277	233	0.000627564	2.26102		34	200499	3	1.49627e-05	1.37851		34	244506	32	0.000130876	12.0576
	35	324608	151	0.000465176	1.67596		35	303744	207	0.000681495	2.45532		35	463616	14	3.01974e-05	2.78208		35	336384	10	2.97279e-05	2.73883
	36	298112	136	0.000456204	1.64363		36	502042	355	0.000707112	2.54762		36	440576	13	2.95068e-05	2.71846		36	193946	34	0.000175307	16.1509
	37	225741	81	0.000358818	1.29277		37	300288	95	0.000316363	1.13981		37	341069	9	2.63876e-05	2.43109		37	534093	25	4.68083e-05	4.31244
	38	286515	130	0.000453728	1.63471		38	360474	205	0.000568696	2.04892		38	268928	3	1.11554e-05	1.02774		38	362112	23	6.35163e-05	5.85174
	39	323277	90	0.000278399	1.00303		39	396134	288	0.000727027	2.61936		39	214477	1	4.6625e-06	0.429555		39	328218	20	6.09351e-05	5.61394
	40	241152	75	0.000311007	1.12051		40	346598	206	0.000594348	2.14135		40	122163	3	2.45574e-05	2.26246		40	569088	28	4.92015e-05	4.53292
	41	316083	80	0.000253098	0.911873		41	407142	239	0.000587019	2.11494		41	142976	3	2.09825e-05	1.93312		41	408090	28	6.86123e-05	6.32124
	42	340019	90	0.000264691	0.953641		42	321715	192	0.000596802	2.15018		42	124365	3	2.41225e-05	2.2224		42	515226	31	6.01678e-05	5.54324
	43	267750	65	0.000242764	0.87464		43	371430	250	0.000673074	2.42498		43	149530	1	6.68762e-06	0.616129		43	566630	41	7.23576e-05	6.66629
	44	258765	66	0.000255058	0.918933		44	319821	194	0.000606589	2.18545		44	272922	3	1.09922e-05	1.0127		44	150502	2	1.32889e-05	1.2243
	45	391194	121	0.000309309	1.11439		45	247373	143	0.000578074	2.08271		45	478592	12	2.50735e-05	2.31002		45	260378	29	0.000111377	10.2611
	46	199629	38	0.000190353	0.685813		46	309990	120	0.000387109	1.39469		46	224333	3	1.3373e-05	1.23205		46	181811	9	4.9502e-05	4.5606
	47	563635	149	0.000264355	0.952432		47	435226	232	0.000533056	1.92052		47	156928	3	1.9117e-05	1.76125		47	396032	17	4.29258e-05	3.95475
	48	569626	96	0.000168532	0.607193		48	450125	266	0.000590947	2.12909		48	189286	3	1.5849e-05	1.46017		48	494771	18	3.63805e-05	3.35172
	49	674048	142	0.000210667	0.759002		49	362061	248	0.000684967	2.46783		49	561229	14	2.49453e-05	2.2982		49	521856	11	2.10786e-05	1.94197
	50	933862	134	0.00014349	0.516973		50	427469	290	0.000678412	2.44421		50	310400	1	3.22165e-06	0.29681		50	388454	32	8.23778e-05	7.58945
	51	703898	104	0.000147749	0.532316		51	271411	155	0.00057109	2.05755		51	796288	19	2.38607e-05	2.19828		51	276378	10	3.61823e-05	3.33347
	52	417357	74	0.000177306	0.638807		52	480640	238	0.000495173	1.78403		52	412467	7	1.69711e-05	1.56354		52	283110	3	1.05966e-05	0.976261
	53	291123	113	0.000388152	1.39845		53	386995	110	0.000284241	1.02408		53	760525	10	1.31488e-05	1.2114		53	245402	3	1.22248e-05	1.12627
	54	350157	126	0.000359839	1.29644		54	507802	230	0.000452932	1.63185		54	334541	7	2.09242e-05	1.92774		54	293299	26	8.86467e-05	8.167
	55	419354	137	0.000326693	1.17702		55	263424	122	0.000463132	1.66859		55	175334	1	5.7034e-06	0.525453		55	250650	25	9.97407e-05	9.18908
	56	329574	118	0.000358038	1.28996		56	408627	293	0.000717035	2.58337		56	237517	1	4.21022e-06	0.387887		56	259840	27	0.00010391	9.57321
	57	245504	71	0.000289201	1.04195		57	442419	335	0.000757201	2.72808		57	178355	3	1.68204e-05	1.54966		57	280858	28	9.96945e-05	9.18483
	58	95872	29	0.000302487	1.08981		58	416333	271	0.000650921	2.34517		58	347187	3	8.64088e-06	0.796082		58	327194	23	7.02947e-05	6.47623
	59	363110	67	0.000184517	0.664787		59	265830	193	0.000726028	2.61577		59	332237	12	3.61188e-05	3.32762		59	321664	26	8.08297e-05	7.44682
	60	424320	75	0.000176753	0.636815		60	281523	190	0.0006749	2.43156		60	165069	2	1.21161e-05	1.11626		60	310349	27	8.69988e-05	8.01518
	61	246067	76	0.000308859	1.11277		61	395085	213	0.000539124	1.94238		61	254054	4	1.57447e-05	1.45055		61	481075	31	6.4439e-05	5.93675
	62	263526	85	0.000322549	1.16209		62	639718	428	0.000669045	2.41047		62	116403	2	1.71817e-05	1.58294		62	164224	22	0.000133963	12.342
	63	168166	40	0.00023786	0.856974		63	497178	202	0.000406293	1.46381		63	281216	8	2.84479e-05	2.6209		63	67379	14	0.00020778	19.1427
	64	197197	53	0.000268767	0.968325		64	571059	375	0.000656675	2.3659		64	382950	9	2.35018e-05	2.16521		64	377651	42	0.000111214	10.2461
	65	220954	83	0.000375644	1.35339		65	400077	238	0.000594885	2.14328		65	333056	4	1.201e-05	1.10648		65	292403	36	0.000123118	11.3428
	66	299955	71	0.000236702	0.852801		66	616422	352	0.000571037	2.05736		66	250726	0	0	0		66	508570	14	2.75282e-05	2.53616
	67	98483	33	0.000335083	1.20725		67	936038	212	0.000226487	0.815996		67	295501	0	0	0		67	306227	12	3.91866e-05	3.61025
	68	307917	97	0.00031502	1.13497		68	344755	165	0.000478601	1.72432		68	191539	0	0	0		68	656333	27	4.11377e-05	3.79
	69	264474	62	0.000234428	0.844606		69	295117	185	0.00062687	2.25852		69	234470	1	4.26494e-06	0.392928		69	538829	110	0.000204146	18.808
	70	408448	88	0.00021545	0.776232		70	221901	92	0.000414599	1.49374		70	343603	3	8.73101e-06	0.804385		70	457984	88	0.000192146	17.7024
	71	413798	129	0.000311746	1.12317		71	751974	192	0.000255328	0.919907		71	218982	1	4.56659e-06	0.420718		71	481075	82	0.000170452	15.7037
	72	230016	69	0.000299979	1.08078		72	311885	89	0.000285362	1.02811		72	383437	1	2.60799e-06	0.240274		72	511488	31	6.06075e-05	5.58375
	73	51635	12	0.000232401	0.837303		73	222106	113	0.000508766	1.83301		73	252134	2	7.93229e-06	0.7308		73	629453	62	9.84982e-05	9.07462
	74	485939	133	0.000273697	0.986088		74	186342	93	0.000499082	1.79812		74	293530	1	3.40681e-06	0.313868		74	358426	12	3.34797e-05	3.08448
	75	291328	58	0.000199088	0.717284		75	244838	133	0.000543216	1.95712		75	238746	2	8.3771e-06	0.771781		75	375219	15	3.99767e-05	3.68304
	76	408371	77	0.000188554	0.679331		76	286541	194	0.000677041	2.43927		76	250138	1	3.99779e-06	0.368316		76	328986	19	5.77532e-05	5.32079
	77	239770	69	0.000287776	1.03681		77	345242	195	0.000564821	2.03496		77	399386	7	1.75269e-05	1.61475		77	319309	37	0.000115875	10.6756
	78	137600	47	0.00034157	1.23062		78	774963	302	0.000389696	1.40401		78	322867	7	2.16808e-05	1.99744		78	244941	10	4.08262e-05	3.7613
	79	488038	127	0.000260226	0.937553		79	69146	37	0.0005351	1.92788		79	267725	3	1.12055e-05	1.03236		79	247475	16	6.4653e-05	5.95646
	80	385946	51	0.000132143	0.47609		80	374144	189	0.000505153	1.81999		80	274637	3	1.09235e-05	1.00638		80	226995	7	3.08377e-05	2.84107
	81	386074	112	0.0002901	1.04518		81	200550	124	0.0006183	2.22764		81	267725	1	3.73518e-06	0.344121		81	269517	20	7.42068e-05	6.83666
	82	375603	116	0.000308837	1.11269		82	177741	94	0.000528859	1.9054		82	274739	2	7.27964e-06	0.670671		82	252621	18	7.1253e-05	6.56452
	83	260685	11	4.21965e-05	0.152028		83	300032	172	0.000573272	2.06541		83	161946	1	6.1749e-06	0.568892		83	263706	15	5.68815e-05	5.24048
	84	377728	26	6.88326e-05	0.247993		84	307968	143	0.000464334	1.67292		84	303846	4	1.31646e-05	1.21285		84	227251	10	4.40042e-05	4.0541
	85	560282	71	0.000126722	0.456559		85	397389	128	0.000322103	1.16049		85	186573	2	1.07197e-05	0.9876		85	313165	27	8.62165e-05	7.94311
	86	338816	20	5.90291e-05	0.212673		86	283418	104	0.000366949	1.32206		86	351923	0	0	0		86	342733	24	7.00254e-05	6.45142
	87	453504	15	3.30758e-05	0.119167		87	392883	140	0.00035634	1.28384		87	331494	2	6.03329e-06	0.555846		87	191360	15	7.83863e-05	7.22171
	88	556979	50	8.977e-05	0.323427		88	562022	117	0.000208177	0.750029		88	245632	6	2.44268e-05	2.25043		88	544410	50	9.18425e-05	8.46143
	89	454784	69	0.00015172	0.546625		89	437709	170	0.000388386	1.39929		89	417229	6	1.43806e-05	1.32488		89	330419	32	9.68467e-05	8.92247
	90	476518	58	0.000121716	0.438525		90	252109	97	0.000384754	1.38621		90	323840	6	1.85277e-05	1.70695		90	492390	8	1.62473e-05	1.49686
	91	286234	51	0.000178176	0.64194		91	535603	237	0.000442492	1.59423		91	383846	3	7.81563e-06	0.720052		91	480384	41	8.53484e-05	7.86313
	92	551552	152	0.000275586	0.992894		92	514739	224	0.000435172	1.56786		92	357965	4	1.11743e-05	1.02948		92	386074	13	3.36723e-05	3.10222
	93	723251	186	0.000257172	0.926551		93	463002	82	0.000177105	0.638082		93	144077	1	6.94073e-06	0.639448		93	169728	8	4.71342e-05	4.34247
	94	692582	147	0.000212249	0.764701		94	186291	65	0.000348916	1.25709		94	349107	2	5.7289e-06	0.527802		94	498304	18	3.61225e-05	3.32796
	95	171853	50	0.000290946	1.04823		95	186726	53	0.000283838	1.02263		95	392013	2	5.10187e-06	0.470034		95	382336	15	3.92325e-05	3.61448
	96	87731	29	0.000330556	1.19094		96	105114	27	0.000256864	0.925441		96	242509	6	2.47413e-05	2.27941		96	317952	9	2.83062e-05	2.60784
	97	59878	18	0.000300611	1.08306		97	299392	72	0.000240487	0.866439		97	381082	8	2.09929e-05	1.93407		97	323507	13	4.01846e-05	3.7022
	98	222899	52	0.00023329	0.840506		98	392934	155	0.000394468	1.42121		98	365491	8	2.18884e-05	2.01657		98	541978	23	4.24371e-05	3.90972
	99	256256	48	0.000187313	0.674859		99	318003	91	0.000286161	1.03099		99	269619	1	3.70894e-06	0.341703		99	418637	9	2.14983e-05	1.98064
	100	188672	36	0.000190807	0.687449		100	277274	75	0.000270491	0.974536		100	199782	0	0	0		100	429722	9	2.09438e-05	1.92954
	101	419507	90	0.000214538	0.772946		101	279194	156	0.000558751	2.01309		101	135142	0	0	0		101	479386	12	2.5032e-05	2.30619
	102	507699	122	0.0002403	0.865763		102	384614	163	0.000423802	1.52689		102	497101	4	8.04665e-06	0.741336		102	217523	6	2.75833e-05	2.54124
	103	408166	110	0.000269498	0.97096		103	217190	56	0.000257839	0.928953		103	214400	1	4.66418e-06	0.42971		103	280192	14	4.99657e-05	4.60333
	104	238310	71	0.000297931	1.0734		104	183219	39	0.00021286	0.766902		104	372096	1	2.68748e-06	0.247597		104	224870	4	1.77881e-05	1.63881
	105	461312	124	0.000268799	0.96844		105	144486	66	0.000456792	1.64575		105	332288	0	0	0		105	426086	18	4.2245e-05	3.89202
	106	146483	28	0.000191148	0.688678		106	163891	62	0.0003783	1.36296		106	275072	2	7.27082e-06	0.669859		106	254208	7	2.75365e-05	2.53693
							107	789811	298	0.000377305	1.35937		107	238720	2	8.37802e-06	0.771865		107	425318	9	2.11606e-05	1.94952
							108	298240	71	0.000238063	0.857705		108	376371	6	1.59417e-05	1.46871		108	108570	7	6.44745e-05	5.94002
							109	263552	105	0.000398403	1.43539		109	305894	0	0	0
							110	342733	145	0.00042307	1.52426		110	287053	3	1.0451e-05	0.962851
							111	394778	162	0.000410357	1.47845		111	256026	4	1.56234e-05	1.43938
							112	223718	93	0.000415702	1.49771		112	293786	1	3.40384e-06	0.313595
							113	167347	53	0.000316707	1.14105		113	336614	2	5.94152e-06	0.547391
													114	301414	3	9.95309e-06	0.916976
													115	343731	1	2.90925e-06	0.268029
													116	291661	1	3.42864e-06	0.31588
													117	486605	2	4.11011e-06	0.378663
													118	204493	5	2.44507e-05	2.25264
													119	240461	0	0	0
													120	318643	1	3.13831e-06	0.289132
													121	276634	2	7.22977e-06	0.666077
													122	93491	0	0	0
													123	309197	3	9.70255e-06	0.893894
													124	228710	2	8.7447e-06	0.805647
													125	264602	0	0	0
													126	251341	0	0	0
													127	440038	2	4.54506e-06	0.418735
													128	282522	2	7.07909e-06	0.652195
													129	340122	2	5.88024e-06	0.541745
													130	289638	1	3.45259e-06	0.318086
													131	580634	2	3.44451e-06	0.317342
													132	166272	0	0	0
													133	135731	0	0	0
													134	173824	0	0	0
				0.000277558	1						1.73286					1.08543e-05	1						5.5802
Exp. 4	with doxycycline (Panel B)												without doxycycline (Panel D)
	FGF2-GFP WT	surface area	nb particles	particles/area	normalization		FGF2-GFP +GPC1	surface area	nb particles	particles/area	normalization		FGF2-GFP WT	surface area	nb particles	particles/area	normalization		FGF2-GFP +GPC1	surface area	nb particles	particles/area	normalization
	1	678605	223	0.000328615	1.2678		1	350131	184	0.000525518	2.02745		1	383334	3	7.82607e-06	0.828855		1	209203	36	0.000172082	18.2251
	2	381056	215	0.000564222	2.17677		2	330214	204	0.000617781	2.38341		2	285773	3	1.04978e-05	1.11182		2	210714	23	0.000109153	11.5603
	3	345754	200	0.000578446	2.23165		3	370893	212	0.000571593	2.20521		3	332262	3	9.02902e-06	0.956258		3	180506	27	0.00014958	15.8419
	4	1082547	533	0.000492357	1.89952		4	304717	204	0.000669474	2.58284		4	375834	0	0	0		4	211661	23	0.000108664	11.5086
	5	427392	288	0.000673854	2.59974		5	196198	102	0.000519883	2.00571		5	200346	2	9.98273e-06	1.05726		5	214630	26	0.000121139	12.8297
	6	504141	307	0.000608957	2.34936		6	93261	35	0.000375291	1.44788		6	153523	1	6.51368e-06	0.68986		6	261914	19	7.25429e-05	7.68297
	7	386918	181	0.000467799	1.80478		7	384282	127	0.000330486	1.27502		7	137830	0	0	0		7	236723	27	0.000114057	12.0797
	8	495642	137	0.000276409	1.06639		8	228531	94	0.000411323	1.58689		8	146534	0	0	0		8	146355	25	0.000170818	18.0912
	9	299418	139	0.000464234	1.79102		9	321459	121	0.000376409	1.45219		9	179456	0	0	0		9	271872	63	0.000231727	24.542
	10	329651	113	0.000342787	1.32248		10	282854	149	0.000526774	2.0323		10	130739	2	1.52977e-05	1.62017		10	523674	12	2.2915e-05	2.42692
	11	200986	74	0.000368185	1.42046		11	522522	179	0.000342569	1.32164		11	254490	2	7.85885e-06	0.832326		11	491315	7	1.42475e-05	1.50894
	12	436736	77	0.000176308	0.680198		12	423142	113	0.00026705	1.03028		12	159770	1	6.259e-06	0.662887		12	221184	5	2.26056e-05	2.39415
	13	619443	9	1.45292e-05	0.0560537		13	360320	110	0.000305284	1.17779		13	261069	2	7.66081e-06	0.811352		13	359194	4	1.1136e-05	1.17941
	14	297574	133	0.000446948	1.72433		14	1171149	363	0.000309952	1.1958		14	123034	1	8.12783e-06	0.860814		14	281651	2	7.10099e-06	0.752061
	15	239411	107	0.00044693	1.72426		15	1480269	234	0.000158079	0.609872		15	190566	0	0	0		15	330470	2	6.05199e-06	0.640962
	16	271770	135	0.000496744	1.91644		16	383309	118	0.000307846	1.18767		16	316979	11	3.47026e-05	3.67533		16	402867	14	3.47509e-05	3.68045
	17	182170	79	0.000433661	1.67307		17	144410	80	0.000553978	2.13725		17	258637	12	4.63971e-05	4.91389		17	432256	28	6.47764e-05	6.86043
	18	298394	186	0.000623337	2.40484		18	418227	238	0.000569069	2.19547		18	432589	18	4.16099e-05	4.40688		18	317594	8	2.51894e-05	2.66779
	19	365798	161	0.000440134	1.69804		19	476544	240	0.000503626	1.943		19	391245	8	2.04475e-05	2.16559		19	369459	21	5.68399e-05	6.01987
	20	185165	69	0.000372641	1.43765		20	252646	160	0.000633297	2.44327		20	156109	7	4.48405e-05	4.74903		20	270310	15	5.54918e-05	5.87711
	21	354893	195	0.000549461	2.11983		21	295296	173	0.000585853	2.26023		21	227840	3	1.31671e-05	1.39452		21	214963	9	4.18677e-05	4.43418
	22	314573	158	0.000502268	1.93776		22	509542	198	0.000388584	1.49916		22	391834	6	1.53126e-05	1.62175		22	380006	15	3.94731e-05	4.18057
	23	337075	136	0.000403471	1.5566		23	283725	45	0.000158604	0.611897		23	366976	7	1.90748e-05	2.0202		23	4690125	148	3.15557e-05	3.34204
	24	354560	114	0.000321525	1.24045		24	730342	246	0.000336828	1.29949		24	357914	4	1.11759e-05	1.18363		24	347469	14	4.02914e-05	4.26723
	25	397107	125	0.000314777	1.21441		25	137728	45	0.000326731	1.26053		25	282624	1	3.53827e-06	0.374736		25	461517	32	6.93366e-05	7.34339
	26	573107	82	0.00014308	0.552003		26	319181	184	0.000576475	2.22405		26	266752	2	7.4976e-06	0.794066		26	656384	56	8.53159e-05	9.03576
	27	803814	282	0.000350827	1.3535		27	287283	121	0.000421187	1.62495		27	112077	0	0	0		27	617139	54	8.75005e-05	9.26713
	28	382234	108	0.000282549	1.09008		28	269952	59	0.000218557	0.843197		28	162381	1	6.15836e-06	0.652228		28	602854	48	7.96213e-05	8.43264
	29	860800	89	0.000103392	0.398888		29	444160	93	0.000209384	0.807806		29	86042	0	0	0		29	226560	71	0.000313383	33.1902
	30	1670554	273	0.000163419	0.630472		30	469504	80	0.000170393	0.657377		30	288717	5	1.7318e-05	1.83414		30	397798	88	0.000221218	23.429
	31	632038	70	0.000110753	0.427286		31	596582	171	0.000286633	1.10583		31	259379	1	3.85536e-06	0.408319		31	527949	65	0.000123118	13.0393
	32	403942	52	0.000128731	0.496647		32	173466	80	0.000461185	1.77926		32	304486	3	9.85267e-06	1.04349		32	295629	46	0.0001556	16.4795
	33	302054	72	0.000238368	0.919626		33	206182	100	0.000485008	1.87117		33	225229	2	8.87985e-06	0.94046		33	281216	46	0.000163575	17.3242
	34	525645	149	0.000283461	1.0936		34	143821	78	0.000542341	2.09236		34	323558	4	1.23625e-05	1.30931		34	146918	38	0.000258648	27.3932
	35	452762	102	0.000225284	0.869148		35	552269	187	0.000338603	1.30633		35	445235	5	1.123e-05	1.18936		35	100173	13	0.000129775	13.7444
	36	410342	85	0.000207144	0.799165		36	500608	116	0.000231718	0.893972		36	421402	12	2.84764e-05	3.01591		36	212941	12	5.63536e-05	5.96838
	37	416538	111	0.000266482	1.02809		37	1070310	181	0.00016911	0.652428		37	499507	18	3.60355e-05	3.8165		37	270771	11	4.06247e-05	4.30254
	38	348518	94	0.000269713	1.04056		38	495821	99	0.000199669	0.770325		38	222080	2	9.00576e-06	0.953795		38	428211	40	9.34119e-05	9.8932
	39	210253	78	0.000370982	1.43125		39	614221	182	0.00029631	1.14317		39	424730	13	3.06077e-05	3.24164		39	406374	22	5.41373e-05	5.73365
	40	399232	177	0.000443351	1.71045		40	321459	90	0.000279973	1.08014		40	502067	21	4.18271e-05	4.42988		40	360986	16	4.4323e-05	4.69423
	41	312320	112	0.000358607	1.38351		41	293376	122	0.000415849	1.60435		41	313190	2	6.3859e-06	0.676327		41	221747	1	4.50964e-06	0.477614
	42	316544	105	0.000331707	1.27973		42	265472	111	0.000418123	1.61312		42	253235	1	3.9489e-06	0.418226		42	335437	10	2.98119e-05	3.15736
	43	223155	70	0.000313683	1.21019		43	175539	45	0.000256353	0.989014		43	366771	3	8.17949e-06	0.866285		43	250650	21	8.37822e-05	8.87332
	44	248422	62	0.000249575	0.962864		44	259994	29	0.000111541	0.430327		44	344166	1	2.90557e-06	0.307728		44	282189	15	5.31559e-05	5.6297
	45	295936	61	0.000206126	0.795235		45	345293	167	0.000483647	1.86592		45	217446	1	4.59884e-06	0.487061		45	330214	31	9.38785e-05	9.94262
	46	175642	41	0.000233429	0.900573		46	233062	105	0.000450524	1.73813		46	120038	3	2.49921e-05	2.6469		46	273741	27	9.86334e-05	10.4462
	47	201882	58	0.000287297	1.10839		47	272563	81	0.000297179	1.14652		47	302746	5	1.65155e-05	1.74915		47	318822	11	3.4502e-05	3.65409
	48	162176	67	0.000413131	1.59387		48	339840	114	0.000335452	1.29418		48	353638	4	1.1311e-05	1.19794		48	258765	11	4.25096e-05	4.50217
	49	193357	116	0.000599927	2.31452		49	333747	95	0.000284647	1.09817		49	162150	0	0	0		49	246656	14	5.67592e-05	6.01133
	50	258176	131	0.000507406	1.95758		50	416435	52	0.000124869	0.481748		50	124083	0	0	0		50	387200	13	3.35744e-05	3.55584
	51	300288	119	0.000396286	1.52888		51	447181	146	0.00032649	1.2596		51	218880	1	4.56871e-06	0.48387		51	323738	19	5.86894e-05	6.21576
	52	329216	120	0.000364502	1.40625		52	298189	104	0.000348772	1.34557		52	175386	0	0	0		52	334438	16	4.78415e-05	5.06686
	53	245043	74	0.000301988	1.16507		53	572621	85	0.00014844	0.572684		53	392960	6	1.52687e-05	1.6171		53	257766	7	2.71564e-05	2.87612
	54	271898	84	0.000308939	1.19189		54	404582	27	6.67355e-05	0.257466		54	300160	2	6.66311e-06	0.705686		54	260045	4	1.5382e-05	1.62909
	55	270259	56	0.000207209	0.799413		55	162765	21	0.00012902	0.497762		55	273178	3	1.09819e-05	1.16308		55	177613	5	2.81511e-05	2.98146
	56	253773	95	0.00037435	1.44425		56	198886	26	0.000130728	0.504351		56	307149	3	9.76725e-06	1.03444		56	388787	16	4.11536e-05	4.35856
	57	169114	60	0.00035479	1.36878		57	228301	80	0.000350415	1.3519		57	272256	5	1.83651e-05	1.94503		57	299699	13	4.33769e-05	4.59402
	58	251213	57	0.000226899	0.875379		58	163814	43	0.000262493	1.0127		58	192205	2	1.04056e-05	1.10205		58	578970	18	3.10897e-05	3.29269
	59	217958	10	4.58804e-05	0.177007		59	224486	74	0.000329642	1.27176		59	272614	5	1.8341e-05	1.94248		59	346931	15	4.32363e-05	4.57913
	60	249318	21	8.42298e-05	0.324959		60	206080	102	0.000494953	1.90954		60	302592	8	2.64382e-05	2.80006		60	411853	33	8.01257e-05	8.48606
	61	197325	45	0.00022805	0.87982		61	245862	119	0.000484011	1.86732		61	258509	5	1.93417e-05	2.04847		61	259994	39	0.000150003	15.8868
	62	223846	52	0.000232303	0.896226		62	345523	89	0.000257581	0.993749		62	283008	2	7.06694e-06	0.748455		62	389555	29	7.44439e-05	7.88431
	63	227968	69	0.000302674	1.16772		63	305075	65	0.000213062	0.821997		63	391552	5	1.27697e-05	1.35243		63	178714	16	8.95285e-05	9.48191
	64	436301	82	0.000187944	0.725089		64	332570	39	0.000117269	0.452423		64	275763	3	1.08789e-05	1.15218		64	414464	15	3.61913e-05	3.833
	65	277274	64	0.000230819	0.890501		65	448461	100	0.000222985	0.860278		65	265754	3	1.12886e-05	1.19557		65	289562	11	3.79884e-05	4.02333
	66	278758	61	0.000218828	0.84424		66	238618	56	0.000234685	0.905416		66	292096	8	2.73883e-05	2.90067		66	380698	9	2.36408e-05	2.50378
	67	292096	68	0.0002328	0.898146		67	307994	32	0.000103898	0.40084		67	279373	1	3.57944e-06	0.379097		67	274509	11	4.00715e-05	4.24395
	68	404429	48	0.000118686	0.457891		68	389222	56	0.000143877	0.555078		68	164122	0	0	0		68	428646	33	7.69866e-05	8.1536
	69	146150	27	0.000184742	0.712736		69	356634	76	0.000213104	0.822156		69	289792	1	3.45075e-06	0.365467		69	442778	15	3.3877e-05	3.58789
	70	192026	50	0.000260381	1.00455		70	393651	47	0.000119395	0.460628		70	321178	1	3.11354e-06	0.329753		70	630093	5	7.93534e-06	0.840427
	71	140646	30	0.000213301	0.82292		71	190797	37	0.000193923	0.748159		71	197581	1	5.06122e-06	0.53603		71	189824	4	2.10722e-05	2.23174
	72	123085	28	0.000227485	0.87764		72	299213	34	0.000113631	0.438391		72	386867	3	7.7546e-06	0.821285		72	238080	4	1.68011e-05	1.77939
	73	281728	31	0.000110035	0.424517		73	337510	13	3.85174e-05	0.1486		73	257587	1	3.88218e-06	0.41116		73	300339	8	2.66366e-05	2.82106
	74	123674	10	8.08577e-05	0.31195		74	266598	7	2.62568e-05	0.101299		74	232320	0	0	0		74	408243	5	1.22476e-05	1.29714
	75	130867	5	3.82067e-05	0.147402		75	263501	42	0.000159392	0.614937		75	268595	0	0	0		75	277683	7	2.52086e-05	2.66983
	76	273843	44	0.000160676	0.61989		76	613274	114	0.000185888	0.717156		76	345088	1	2.89781e-06	0.306905		76	194176	9	4.63497e-05	4.90887
	77	279834	57	0.000203692	0.785847		77	634931	49	7.71737e-05	0.297737		77	383462	7	1.82547e-05	1.93335		77	164173	4	2.43645e-05	2.58043
	78	315853	94	0.000297607	1.14817		78	400998	28	6.98258e-05	0.269389		78	351616	2	5.68802e-06	0.602415		78	243328	7	2.87678e-05	3.04677
	79	283878	68	0.00023954	0.924146		79	196070	39	0.000198909	0.767391		79	256230	2	7.80549e-06	0.826674		79	263936	12	4.54656e-05	4.81523
	80	246400	62	0.000251623	0.970766		80	276250	80	0.000289593	1.11725		80	241126	1	4.14721e-06	0.439228		80	384512	1	2.6007e-06	0.275438
	81	204544	37	0.00018089	0.697876		81	184448	45	0.000243971	0.941244		81	217907	2	9.17823e-06	0.97206		81	451661	8	1.77124e-05	1.87591
	82	231936	34	0.000146592	0.565554		82	85555	16	0.000187014	0.721503		82	393472	2	5.08295e-06	0.538332		82	477952	5	1.04613e-05	1.10795
	83	234214	28	0.000119549	0.461221		83	183654	40	0.000217801	0.840278		83	215987	1	4.62991e-06	0.490351		83	229350	2	8.7203e-06	0.923561
	84	362394	26	7.17451e-05	0.276793		84	135526	26	0.000191845	0.740141		84	256794	0	0	0		84	245632	3	1.22134e-05	1.29351
	85	291277	41	0.000140759	0.543052		85	220518	38	0.000172322	0.664818		85	389990	1	2.56417e-06	0.271569		85	322330	6	1.86145e-05	1.97145
	86	226918	36	0.000158648	0.612064		86	123494	23	0.000186244	0.718531		86	195149	0	0	0		86	233165	4	1.71552e-05	1.8169
	87	178534	75	0.000420088	1.6207		87	440141	101	0.000229472	0.885305		87	200038	1	4.99905e-06	0.529446		87	357018	7	1.96069e-05	2.07655
	88	393754	138	0.000350473	1.35213		88	261888	48	0.000183284	0.707114		88	179405	3	1.67219e-05	1.77101		88	395341	4	1.01178e-05	1.07157
	89	346240	71	0.00020506	0.791124								89	172442	4	2.31962e-05	2.4567		89	277965	2	7.19515e-06	0.762034
	90	721562	28	3.88047e-05	0.149709								90	335770	0	0	0		90	356890	6	1.68119e-05	1.78054
	91	461901	34	7.36088e-05	0.283984								91	203955	2	9.80608e-06	1.03856		91	263859	9	3.41091e-05	3.61248
	92	388736	14	3.60142e-05	0.138943								92	156979	2	1.27406e-05	1.34934		92	346061	9	2.6007e-05	2.75438
	93	156774	27	0.000172222	0.664436								93	167219	5	2.99009e-05	3.16679
	94	178125	14	7.85965e-05	0.303226								94	380134	2	5.2613e-06	0.557221
	95	433331	46	0.000106154	0.409545								95	330931	3	9.06533e-06	0.960104
	96	182605	56	0.000306673	1.18315								96	229709	3	1.306e-05	1.38318
	97	223590	74	0.000330963	1.27686								97	168627	0	0	0
	98	161536	44	0.000272385	1.05086								98	337254	0	0	0
	99	308941	82	0.000265423	1.024								99	291072	0	0	0
	100	311501	102	0.000327447	1.26329								100	357965	3	8.38071e-06	0.887596
	101	331315	115	0.000347102	1.33912								101	270080	3	1.11078e-05	1.17642
	102	389990	47	0.000120516	0.464952								102	255693	0	0	0
	103	278144	61	0.000219311	0.846104								103	244122	1	4.09631e-06	0.433838
	104	426906	138	0.000323256	1.24713								104	349210	1	2.86361e-06	0.303283
	105	251853	74	0.000293822	1.13357								105	283008	3	1.06004e-05	1.12268
	106	244787	115	0.000469796	1.81248								106	255155	5	1.95959e-05	2.07539
	107	228966	102	0.000445481	1.71867								107	218906	3	1.37045e-05	1.45144
	108	228454	62	0.000271389	1.04702								108	224589	3	1.33577e-05	1.41471
	109	323840	104	0.000321146	1.23899								109	240000	3	1.25e-05	1.32387
	110	394778	87	0.000220377	0.850217								110	348262	0	0	0
	111	292480	74	0.000253009	0.976111								111	313472	2	6.38016e-06	0.675718
	112	99354	38	0.000382471	1.47558								112	323456	1	3.09161e-06	0.327431
	113	23040	12	0.000520833	2.00938								113	346957	0	0	0
	114	489190	127	0.000259613	1.00159								114	205158	1	4.87429e-06	0.516233
	115	347443	38	0.00010937	0.421952								115	243046	1	4.11445e-06	0.435759
	116	546304	77	0.000140947	0.543776								116	262400	0	0	0
	117	666112	129	0.000193661	0.747147								117	235622	0	0	0
	118	450406	101	0.000224242	0.865129								118	244480	0	0	0
	119	291456	25	8.57762e-05	0.330926								119	368333	1	2.71493e-06	0.287537
	120	411930	26	6.31175e-05	0.243508								120	403200	1	2.48016e-06	0.262672
	121	318310	38	0.00011938	0.460571								121	475059	3	6.31501e-06	0.668818
	122	169779	32	0.00018848	0.727159								122	384589	1	2.60018e-06	0.275383
	123	464870	90	0.000193603	0.746921								123	293171	0	0	0
	124	431974	96	0.000222236	0.857387								124	312371	0	0	0
	125	291277	41	0.000140759	0.543052								125	364826	0	0	0
	126	183373	22	0.000119974	0.462861								126	259021	2	7.72138e-06	0.817767
	127	322944	19	5.88337e-05	0.226981								127	160256	0	0	0
	128	215245	32	0.000148668	0.573562
	129	181530	24	0.00013221	0.510066
	130	444774	59	0.000132652	0.511772
	131	425370	45	0.00010579	0.40814
	132	502758	97	0.000192936	0.744348
	133	235494	26	0.000110406	0.425948
	134	159002	8	5.03138e-05	0.194111
	135	339149	36	0.000106148	0.40952
	136	388557	49	0.000126108	0.486525
	137	378701	76	0.000200686	0.774249
	138	172621	30	0.000173791	0.670488
	139	151270	20	0.000132214	0.510083
	140	324301	27	8.3256e-05	0.321203
				0.000259201	1						1.15737					9.44203e-06	1						6.52289
