# Supplementary material for: Glypican-1 drives unconventional secretion of fibroblast growth factor 2
Source: eLife. 2022 Mar 29;11:e75545. doi: 10.7554/eLife.75545 (PMC8986318; doi:10.7554/eLife.75545)
Supplement: Figure 7—source data 1. [file elife-75545-fig7-data1.xlsx]

## Sheet: Sheet1
GPC1
	Exp. I		Exp. II		Exp. III		Exp. IV					Average			SD
Standard	Peak Area	% Area	Peak Area	% Area	Peak Area	% Area	Peak Area	% Area				GPC1	GPC5	SDC4	GPC1	GPC5	SDC4
1	39449	1.01					65430	1.03				1.02	1.915	1.3075	0.0141421	0.778567	0.266004
2	2376518	60.97	4833134	61.17	4068702	64.06	3861816	60.73				61.7325	66.6775	63.5325	1.56206	1.2265	0.251446
3
4			92833	1.17								1.17
5	576135	14.78	1212813	15.35	939757	14.8	1015123	15.96				15.2225	13.555	12.89	0.558114	1.13186	0.0469042
6	111280	2.86	211316	2.68	176985	2.79	170345	2.68				2.7525	3.2325	3.3225	0.088459	0.197716	0.198725
7	56490	1.45	111547	1.41	82108	1.29	88605	1.39				1.385	1.4125	0.8825	0.0680686	0.104682	0.138414
8
9	97114	2.49	186311	2.36	145854	2.3	149251	2.35				2.375	2.085	2.8775	0.081035	0.168622	0.205487
10	245258	6.29	480098	6.08	364298	5.74	384277	6.04				6.0375	4.7575	5.6375	0.226624	0.313728	0.0670199
11
12	395025	10.13	773056	9.79	573423	9.03	624146	9.82				9.6925	6.24	9.5525	0.467645	0.155563	0.156498
GPC5
	Exp. I		Exp. II		Exp. III		Exp. IV
Standard	Peak Area	% Area	Peak Area	% Area	Peak Area	% Area	Peak Area	% Area
1	37144	1.7	180477	3.06	41412	1.33	47217	1.57
2	1424526	65.07	3927382	66.5	2088472	67.18	2048135	67.96
3
4
5	330208	15.09	788955	13.36	416885	13.41	372486	12.36
6	75608	3.45	175587	2.97	101030	3.25	98207	3.26
7	31347	1.43	74552	1.26	45721	1.47	44802	1.49
8
9	48430	2.21	108766	1.84	65443	2.11	65671	2.18
10	109518	5	253754	4.3	149848	4.82	147975	4.91
11
12	132609	6.06	365812	6.19	199903	6.43	189117	6.28
SDC4
	Exp. I		Exp. II		Exp. III		Exp. IV
Standard	Peak Area	% Area	Peak Area	% Area	Peak Area	% Area	Peak Area	% Area
1	61916	1.08	100716	1.68	68914	1.16	75163	1.31
2	3657427	63.83	3813684	63.65	3768904	63.3	3625004	63.35
3
4
5	734777	12.82	773290	12.91	768725	12.91	739424	12.92
6	183754	3.21	192977	3.22	215597	3.62	185353	3.24
7	46183	0.81	48877	0.82	65002	1.09	46161	0.81
8
9	181898	3.17	162713	2.72	163704	2.75	164297	2.87
10	321745	5.62	333851	5.57	335485	5.63	328022	5.73
11
12	541978	9.46	565619	9.44	567454	9.53	559419	9.78
