# Supplementary material for: Glypican-1 drives unconventional secretion of fibroblast growth factor 2
Source: eLife. 2022 Mar 29;11:e75545. doi: 10.7554/eLife.75545 (PMC8986318; doi:10.7554/eLife.75545)
Supplement: Figure 8—source data 1. [file elife-75545-fig8-data1.xlsx]

## Sheet: Sheet1
	Exp. I								+Heparinase
	GPC1 KO		Wt		GPC1 KO +GPC1		WT +GPC1		GPC1 KO		Wt		GPC1 KO +GPC1		WT +GPC1
ng FGF2	10	1	10	1	10	1	10	1	10	1	10	1	10	1	10	1
pERK1/2	4590	4200	4060	2820	4820	3960	4570	4790	3360	919	1200	91.9	4120	1430	2580	636
ERK1/2	11300	11300	8350	6320	12300	10400	11800	12000	11600	11700	9780	7410	13300	12100	9240	11100
	0.406195	0.371681	0.486228	0.446203	0.39187	0.380769	0.387288	0.399167	0.289655	0.078547	0.122699	0.0124022	0.309774	0.118182	0.279221	0.0572973
Norm to WT	0.8354	0.832988	1	1	0.805939	0.853355	0.796516	0.894586	0.595719	0.176034	0.25235	0.0277949	0.637098	0.264861	0.574259	0.128411
	Exp. II
ng FGF2	10	1	10	1	10	1	10	1	10	1	10	1	10	1	10	1
pERK1/2	6810	7050	6260	5500	4120	3740	3900	3510	3750	845	1740	379	2730	1420	3620	1580
ERK1/2	12400	14200	9540	10200	6570	6690	5570	6140	12700	12600	11000	11900	7070	8410	6360	7340
	0.549194	0.496479	0.656184	0.539216	0.627093	0.559043	0.70018	0.571661	0.295276	0.0670635	0.158182	0.0318487	0.386139	0.168847	0.569182	0.215259
Norm to WT	0.83695	0.920743	1	1	0.955665	1.03677	1.06705	1.06017	0.449989	0.124372	0.241063	0.0590649	0.58846	0.313134	0.867412	0.399207
	Exp. III
ng FGF2	10	1	10	1	10	1	10	1	10	1	10	1	10	1	10	1
pERK1/2	24800	20800	19900	13800	20700	14700	29000	22200	14600	4830	5820	1740	23300	10100	16000	4580
ERK1/2	33300	31300	22500	17900	20900	21700	38100	34500	28000	29200	22400	18200	36200	35900	34300	35400
	0.744745	0.664537	0.884444	0.77095	0.990431	0.677419	0.761155	0.643478	0.521429	0.165411	0.259821	0.0956044	0.643646	0.281337	0.466472	0.129379
Norm to WT	0.842048	0.861972	1	1	1.11983	0.878682	0.860602	0.834657	0.589555	0.214555	0.293768	0.124009	0.727741	0.364923	0.527418	0.167817
	Exp. IV
ng FGF2	10	1	10	1	10	1	10	1	10	1	10	1	10	1	10	1
pERK1/2	58600	65800	63800	52100	43100	34900	39200	46500	37600	15600	15200	2520	24300	5670	21500	11600
ERK1/2	173000	191000	174000	173000	93900	115000	103000	116000	170000	164000	110000	108000	103000	80100	90500	95700
	0.338728	0.344503	0.366667	0.301156	0.458999	0.303478	0.380583	0.400862	0.221176	0.095122	0.138182	0.0233333	0.235922	0.0707865	0.237569	0.121212
Norm to WT	0.923805	1.14393	1	1	1.25182	1.00771	1.03795	1.33108	0.603209	0.315856	0.37686	0.0774792	0.643425	0.235049	0.647916	0.402489
Average	0.859551	0.939909	1	1	1.03331	0.94413	0.940529	1.03012	0.559618	0.207704	0.29101	0.0720869	0.649181	0.294492	0.654251	0.274481
SD	0.0429299	0.140831	0	0	0.194042	0.0915578	0.132446	0.222151	0.0732991	0.0810163	0.061555	0.0402339	0.057844	0.0569193	0.150514	0.146807
