# Supplementary material for: Glypican-1 drives unconventional secretion of fibroblast growth factor 2
Source: eLife journal article supplement (doi:10.7554/elife.75545), 2022-03-29
Supplement: supp [file elife-75545-supp-v1.zip]

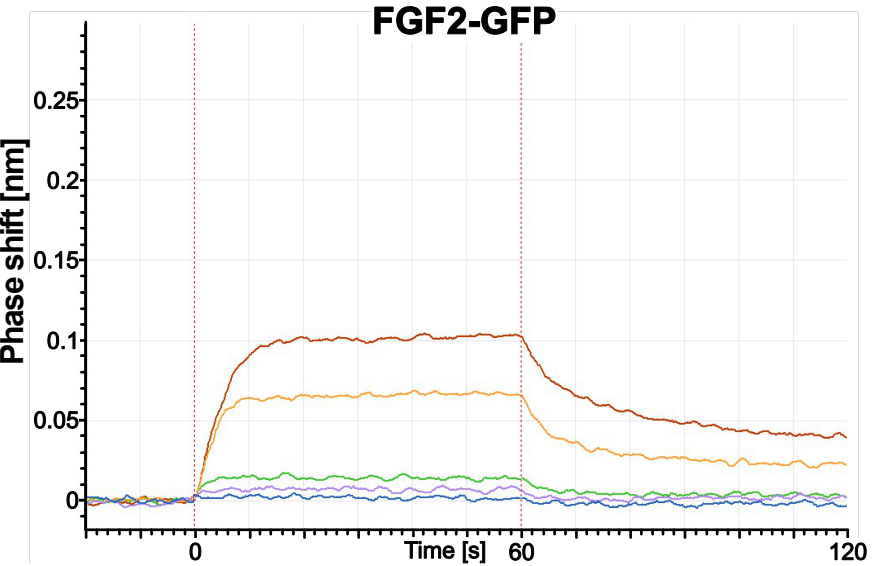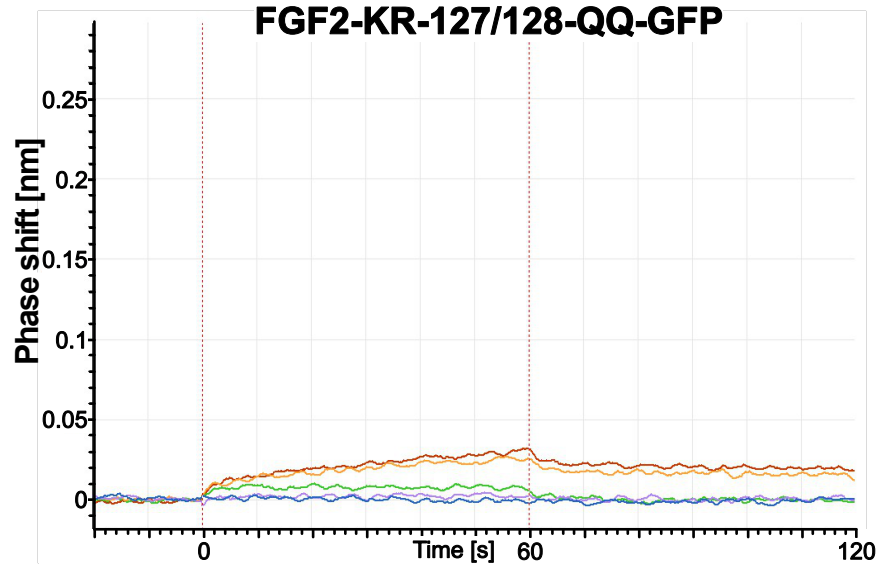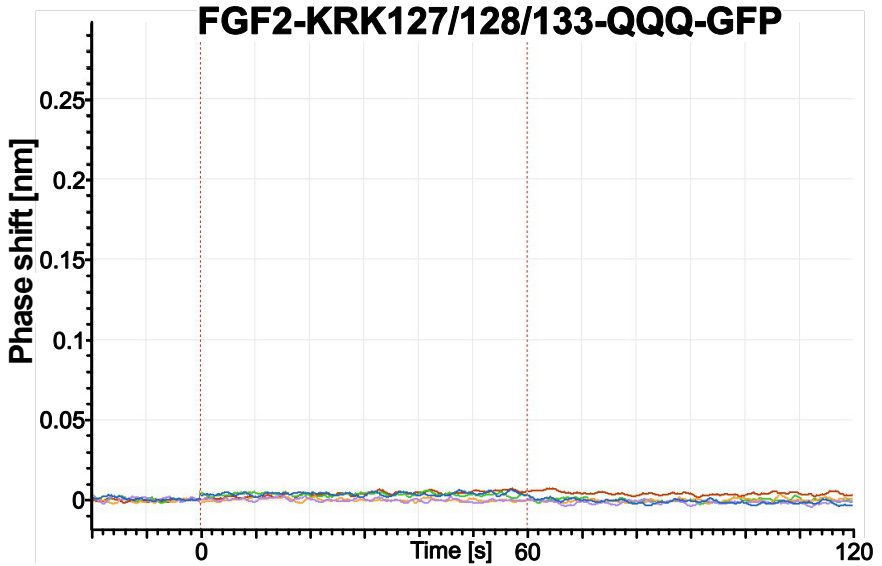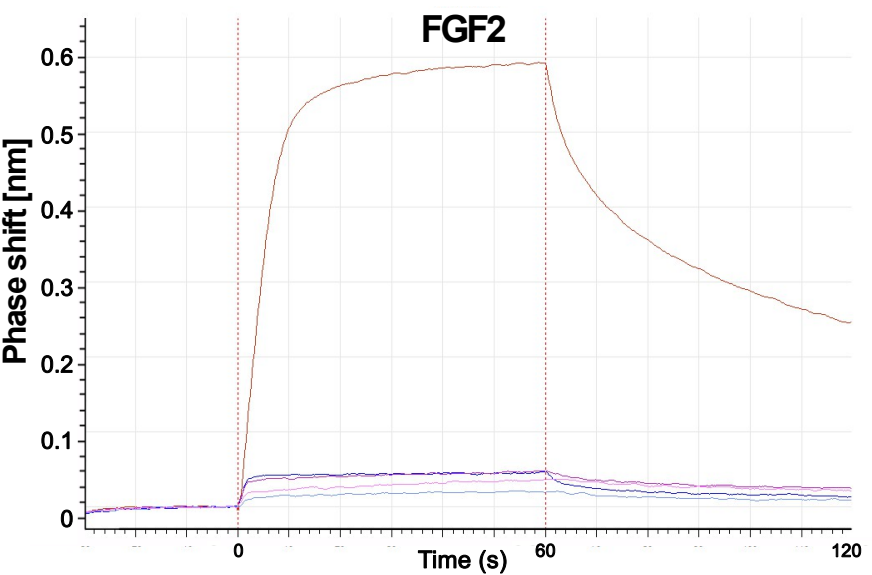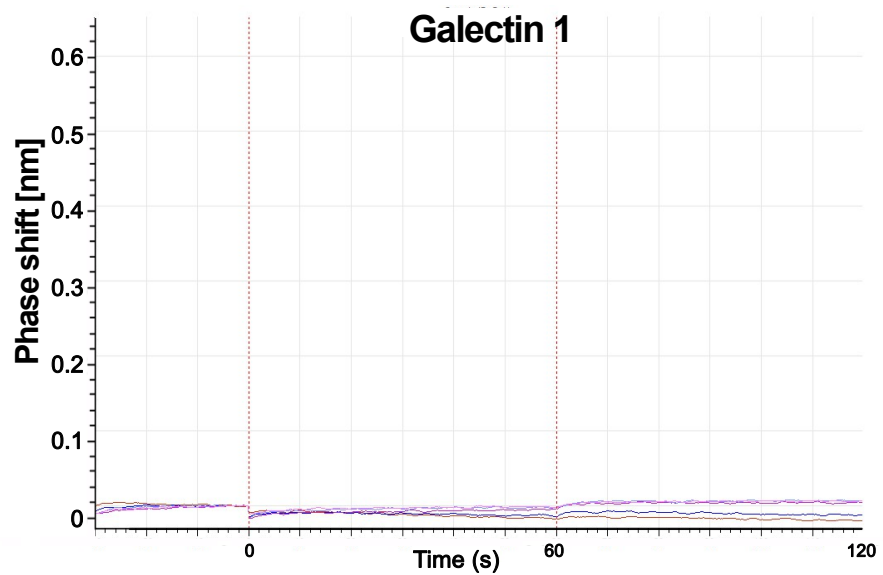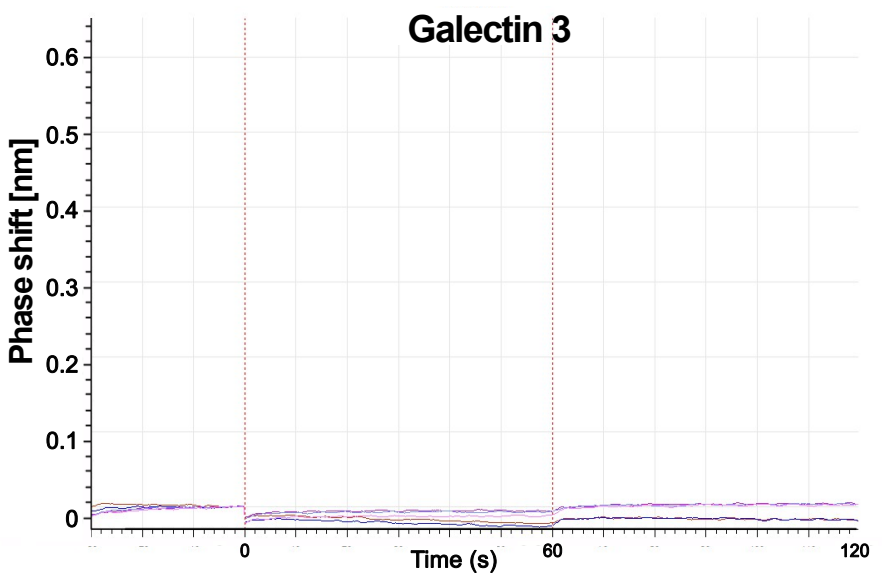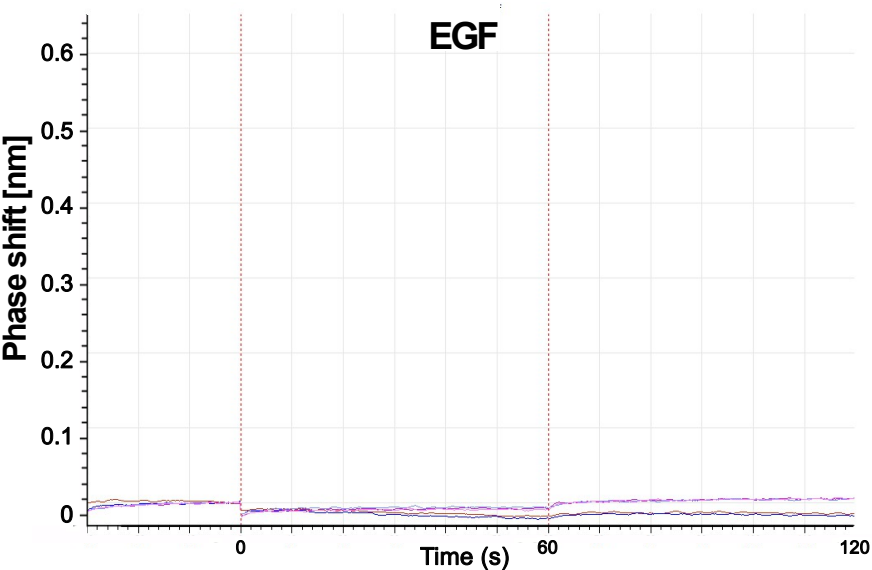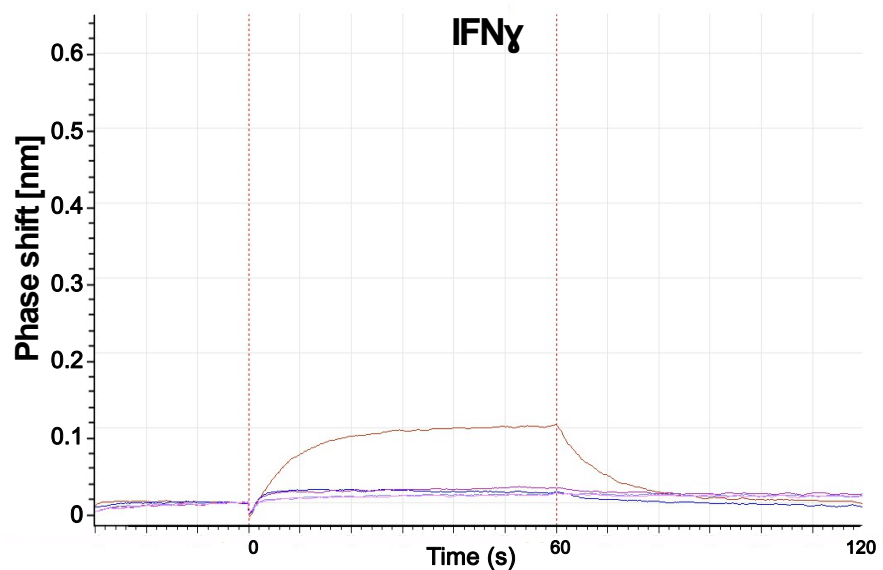

**GPC1**  
**GPC1  $\Delta$ HS**  
GPC1 (Heparinase III-treated)  
**GPC5**  
**GPC6**  
**SDC4**  
**SDC4 Chondroitinase ABC-treated**  
SDC4 Heparinase III-treated
