# Supplementary figures and images for: Glypican-1 drives unconventional secretion of fibroblast growth factor 2
Source: eLife journal article supplement (doi:10.7554/elife.75545), 2022-03-29

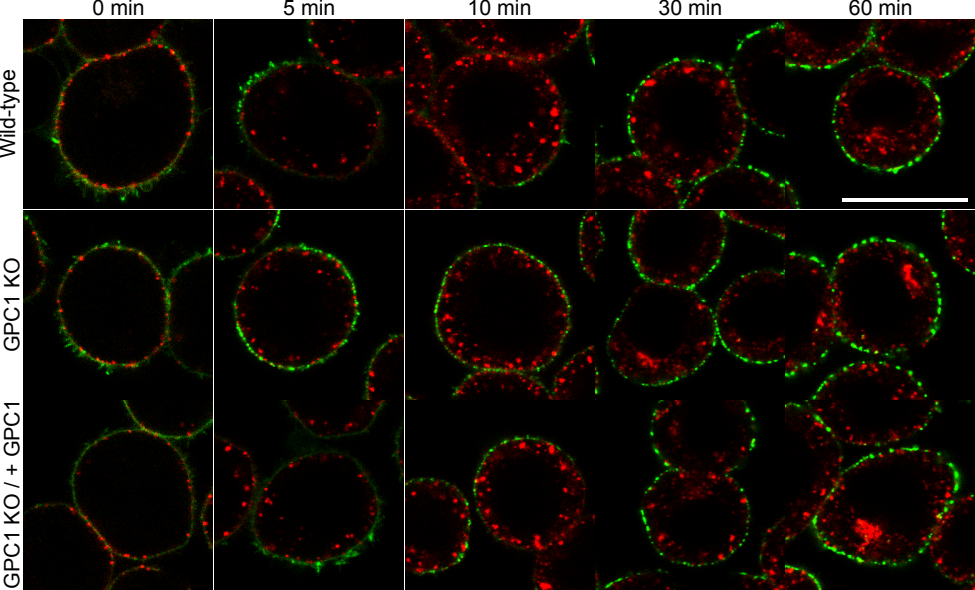

Supplement: supp [file elife-75545-supp-v1.zip]

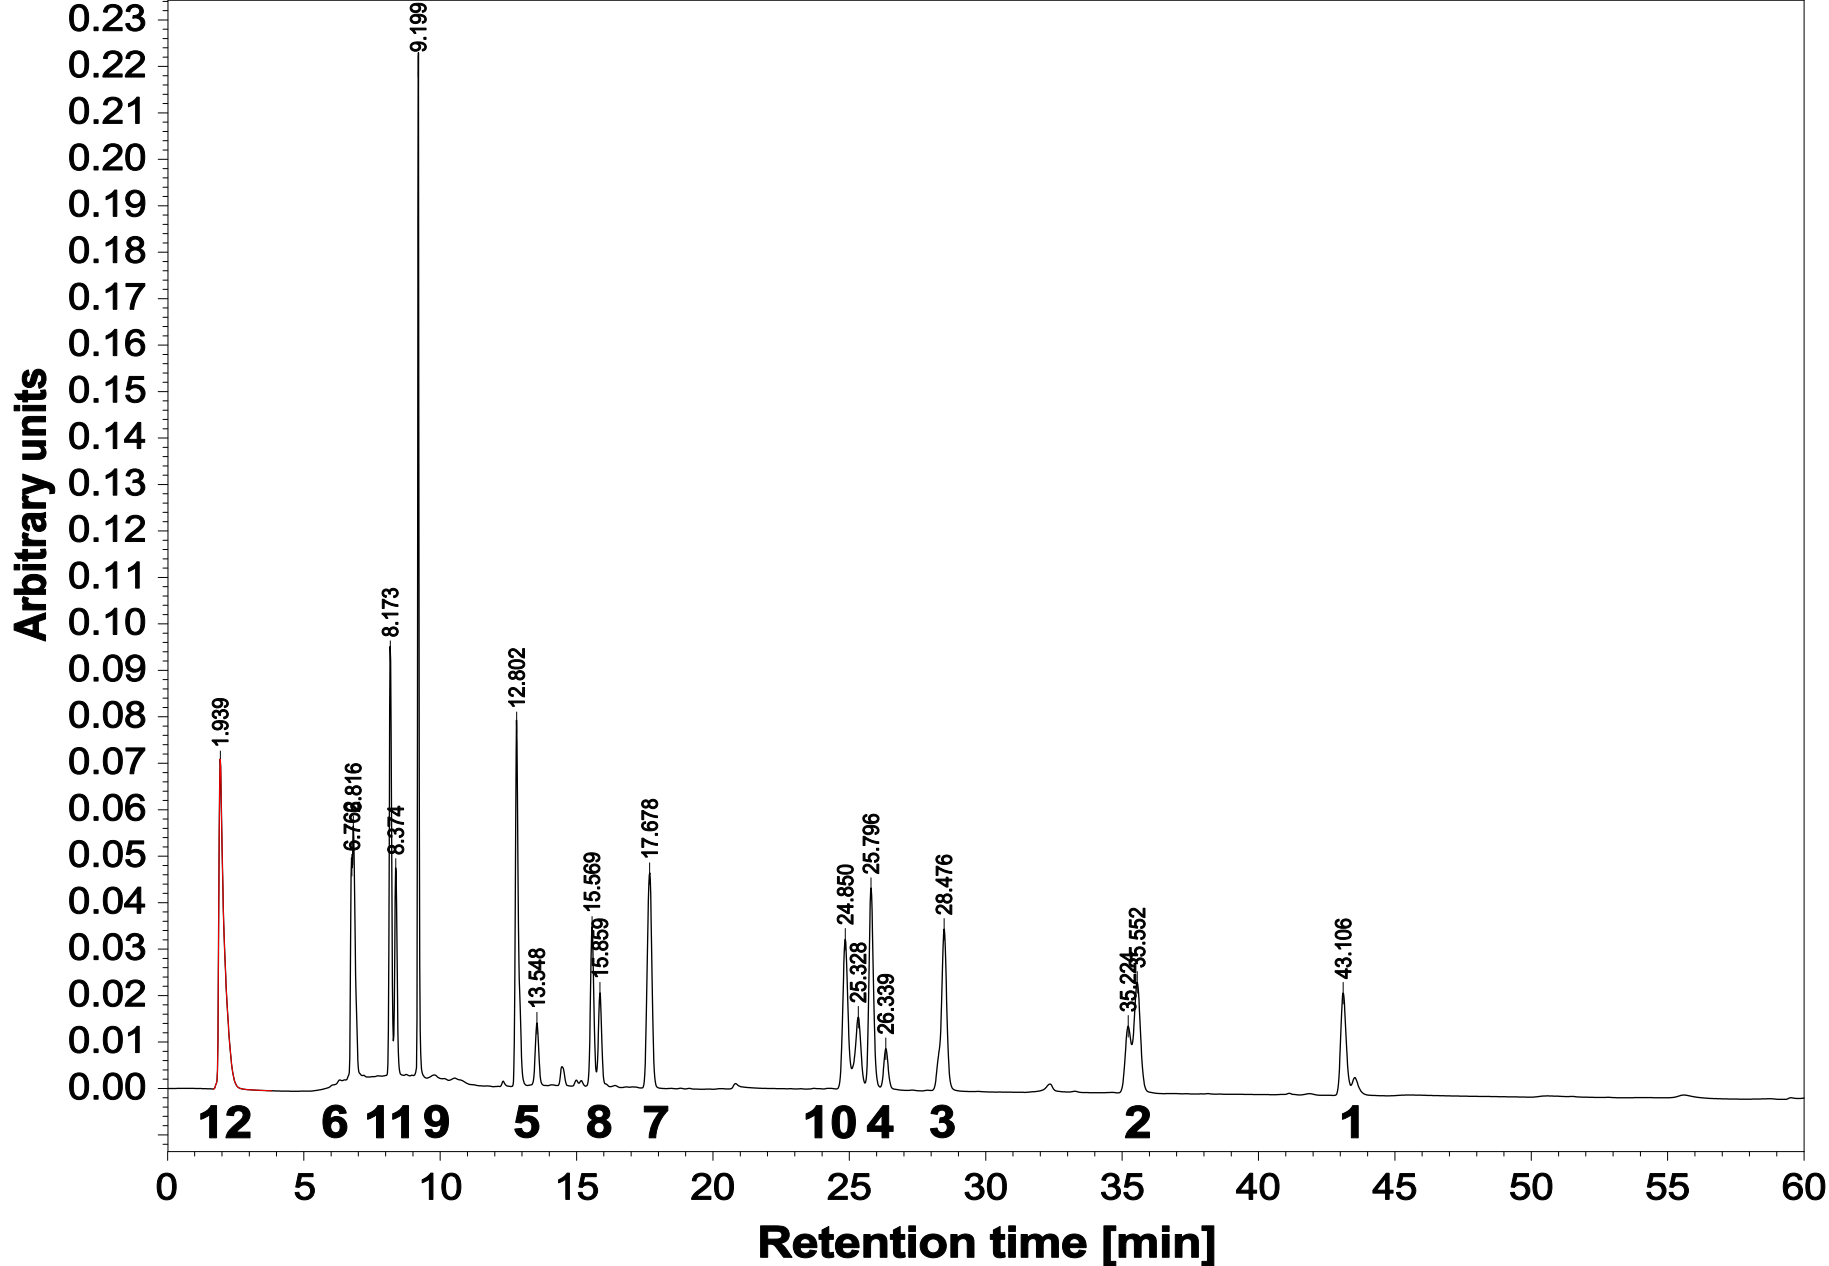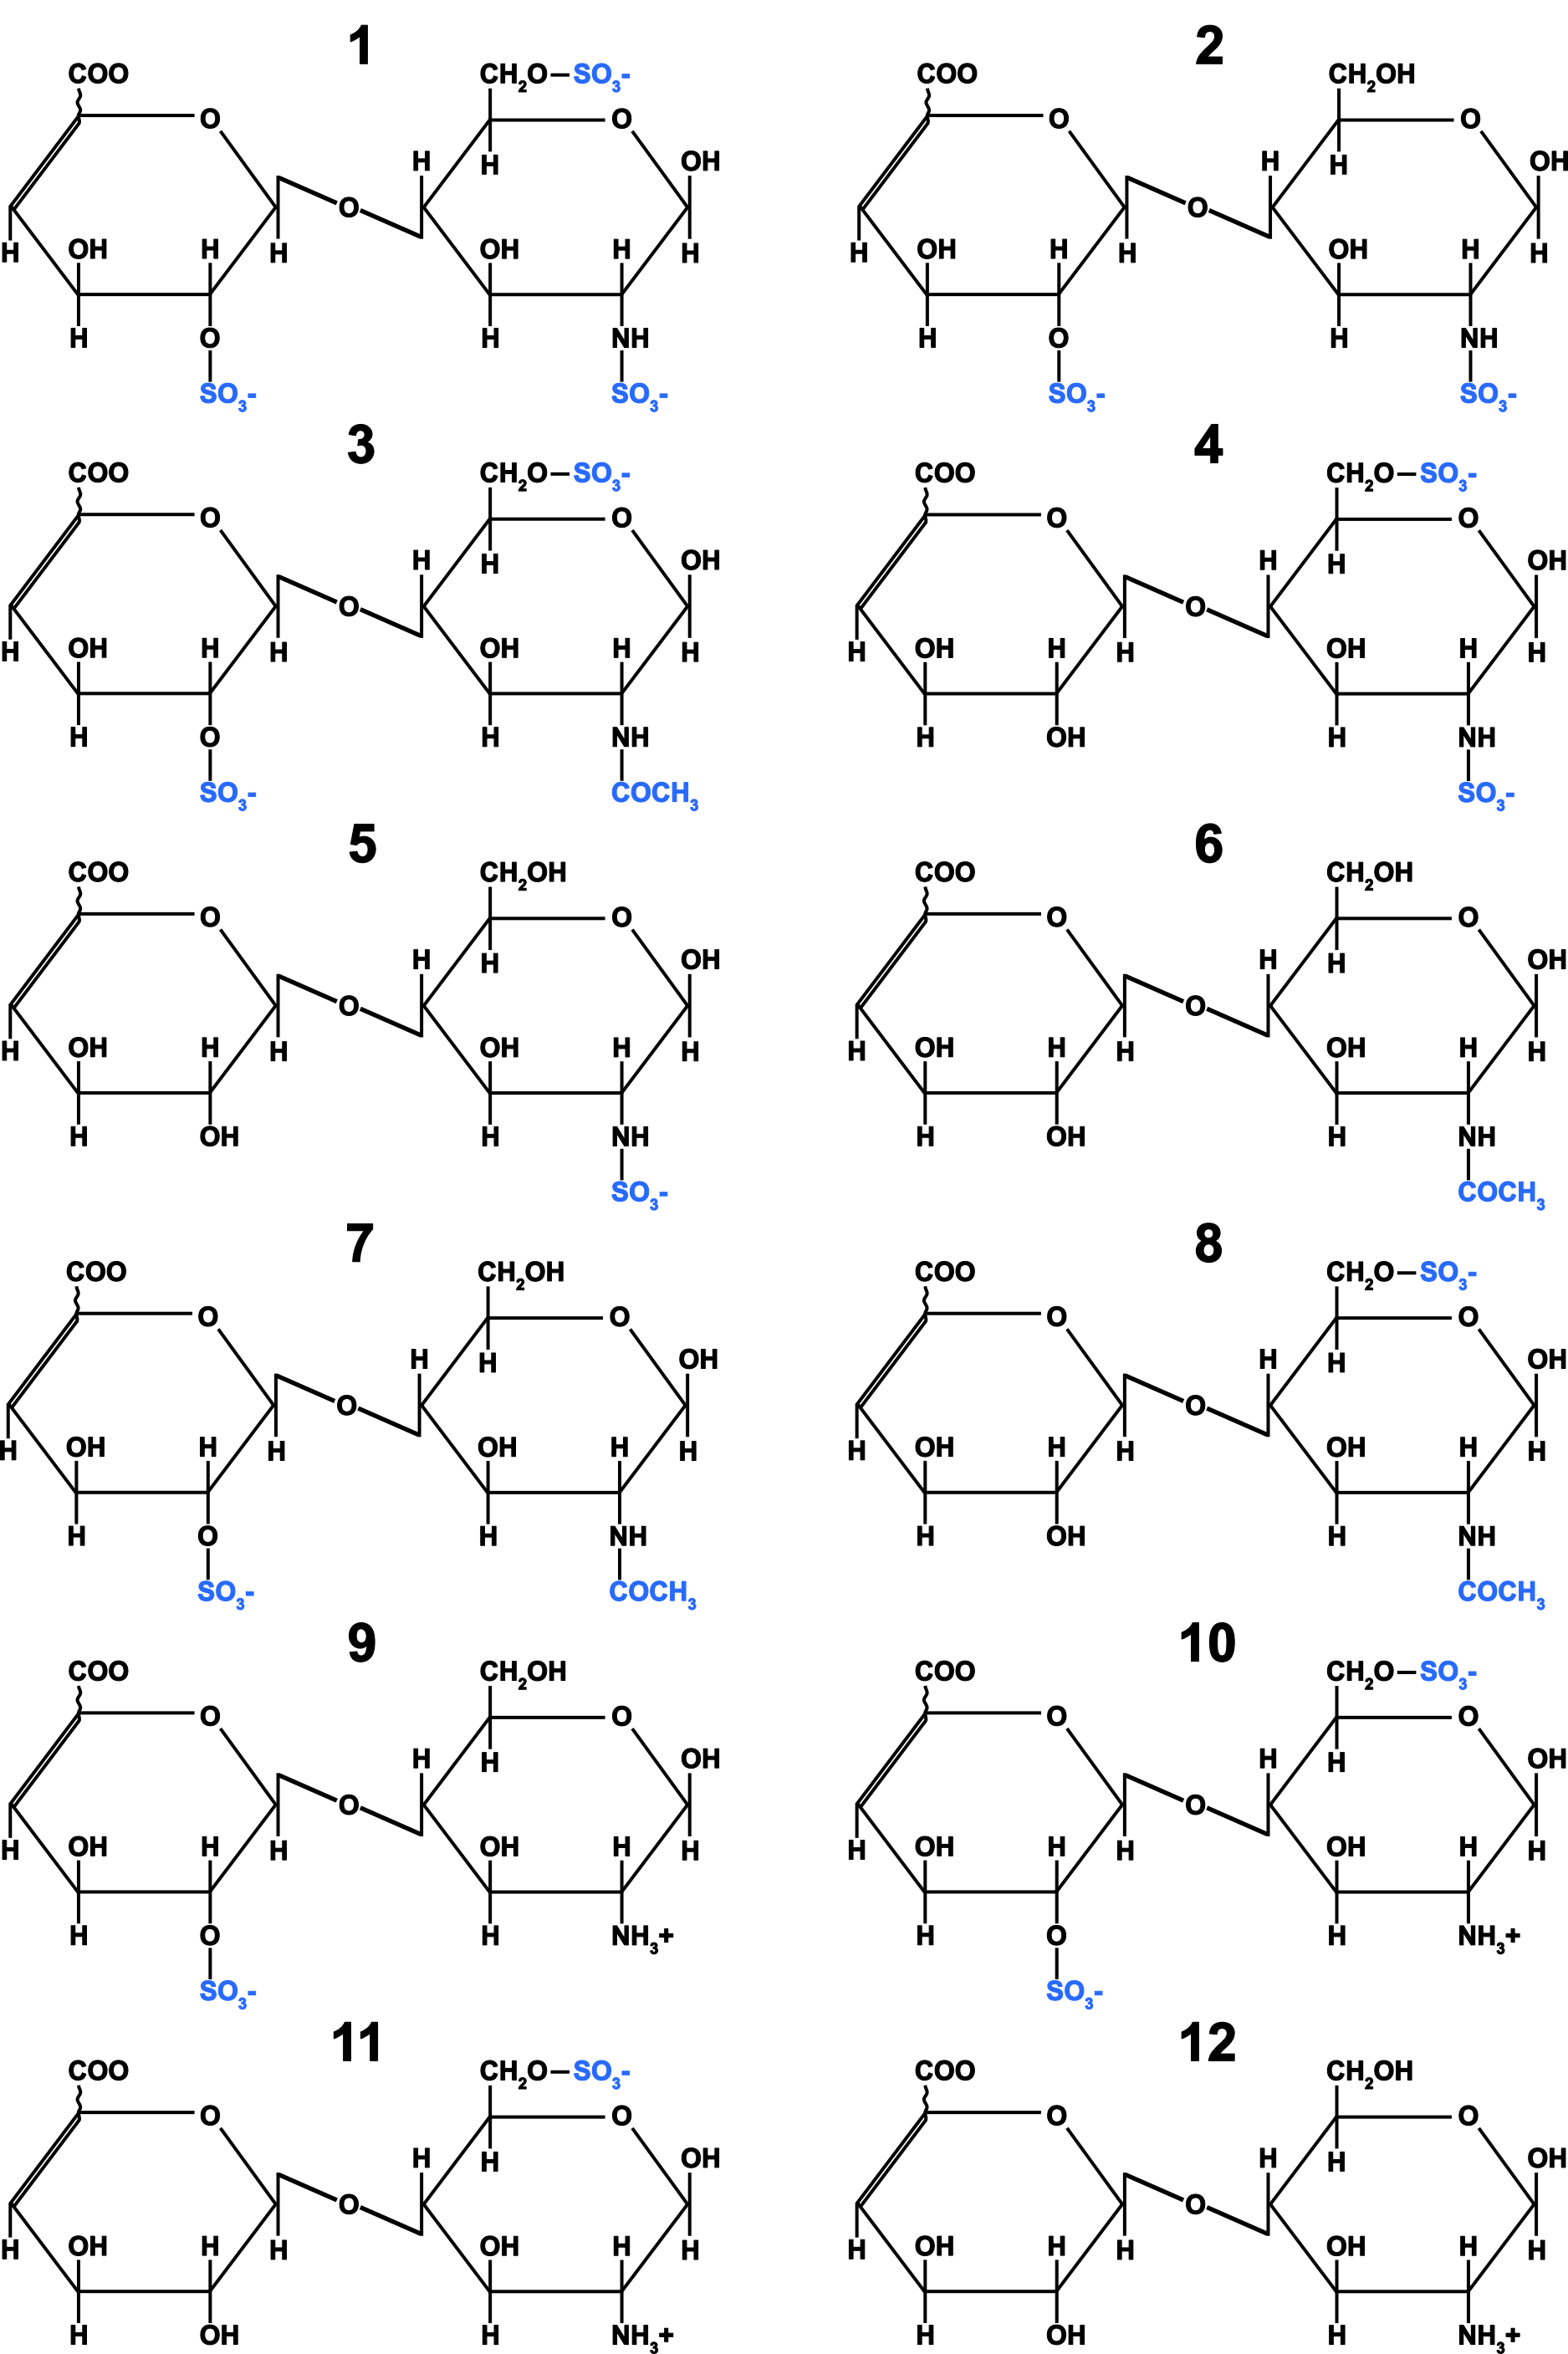

Supplement: supp [file elife-75545-supp-v1.zip]
